# Supplementary material for: Burden of Peripheral Artery Disease and Its Attributable Risk Factors in 204 Countries and Territories From 1990 to 2019
Source: PubMed Central journal article supplement (PMC9039520; doi:10.3389/fcvm.2022.868370), 2022-04-12
Supplement: Table_1.pdf [file Table_1.pdf]

**Table S1. Number of peripheral artery disease prevalent cases, incident cases, deaths, YLDs, and YLLs in 2019, and their percentage changes from 1990 to 2019, by SDI quintile, and GBD region**

|                        | Prevalence                        |                                   | Incidence                      |                                   | Deaths                  |                                   | YLDs                      |                                   | YLLs                        |                                   |
|------------------------|-----------------------------------|-----------------------------------|--------------------------------|-----------------------------------|-------------------------|-----------------------------------|---------------------------|-----------------------------------|-----------------------------|-----------------------------------|
|                        | Number cases                      | Percentage change in number cases | Number cases                   | Percentage change in number cases | Number cases            | Percentage change in number cases | Number cases              | Percentage change in number cases | Number cases                | Percentage change in number cases |
| <b>Global</b>          | 113443017<br>(99158208-128415296) | 72.5%<br>(70.2%-74.7%)            | 10504092<br>(9162529-11999888) | 71.5%<br>(69.6%-73.3%)            | 74063<br>(41183-128164) | 145.5%<br>(96.5%-176.2%)          | 500893<br>(234625-898104) | 65.4%<br>(62.0%-69.4%)            | 1035487<br>(604347-1778564) | 119.1%<br>(78.3%-150.4%)          |
| <b>SDI quintiles</b>   |                                   |                                   |                                |                                   |                         |                                   |                           |                                   |                             |                                   |
| <b>Low SDI</b>         | 4354605<br>(3744362-5006216)      | 126.3%<br>(123.5%-129.3%)         | 470118<br>(404625-538077)      | 114.9%<br>(112.0%-118.1%)         | 2684<br>(1500-3641)     | 186.5%<br>(116.2%-283.5%)         | 21879<br>(10260-39153)    | 109.9%<br>(103.3%-118.0%)         | 51064<br>(29678-69282)      | 164.1%<br>(98.2%-250.9%)          |
| <b>Low-middle SDI</b>  | 13410114<br>(11591984-15328969)   | 139.1%<br>(134.9%-143.5%)         | 1398309<br>(1206028-1602467)   | 128.6%<br>(124.6%-132.9%)         | 3721<br>(2773-4762)     | 328.4%<br>(228.5%-408.7%)         | 66031<br>(30925-118081)   | 123.0%<br>(114.6%-133.2%)         | 62647<br>(48113-78309)      | 283.6%<br>(194.3%-357.1%)         |
| <b>Middle SDI</b>      | 30576763<br>(26400708-35052196)   | 160.8%<br>(157.7%-164.1%)         | 2915099<br>(2520526-3342399)   | 141.7%<br>(138.7%-144.6%)         | 6643<br>(5028-9304)     | 273.5%<br>(204.2%-334.1%)         | 141511<br>(65058-254571)  | 130.3%<br>(120.9%-142.1%)         | 109239<br>(84336-147880)    | 235.6%<br>(174.2%-291.1%)         |
| <b>High-middle SDI</b> | 30755470<br>(26773011-34985543)   | 70.8%<br>(68.8%-72.9%)            | 2745997<br>(2383531-3147380)   | 64.3%<br>(62.5%-66.3%)            | 26243<br>(13528-47034)  | 117.7%<br>(69.3%-160.4%)          | 135870<br>(63778-244664)  | 58.7%<br>(54.0%-64.6%)            | 384804<br>(201007-702372)   | 90.3%<br>(43.2%-126.5%)           |
| <b>High SDI</b>        | 34291798                          | 20.4%                             | 2855740                        | 18.2%<br>(14.7%-21.8%)            | 34713                   | 139.2%                            | 135353                    | 17.1%<br>(12.4%-22.1%)            | 426939                      | 111.4%<br>(64.2%-137.7%)          |

|                                  |                                 |                        |                              |                        |                       |                           |                        |                        |                           |                           |
|----------------------------------|---------------------------------|------------------------|------------------------------|------------------------|-----------------------|---------------------------|------------------------|------------------------|---------------------------|---------------------------|
|                                  | (30198669-38329603)             | (16.7%-24.3%)          | (2518228-3241195)            |                        | (16832-63581)         | (82.9%-172.7%)            | (63670-244469)         |                        | (208630-793277)           |                           |
| <b>GBD region</b>                |                                 |                        |                              |                        |                       |                           |                        |                        |                           |                           |
| <b>Central Asia</b>              | 809162<br>(698260-926301)       | 53.6%<br>(49.3%-57.9%) | 85439<br>(73678-98428)       | 59.6%<br>(54.7%-64.5%) | 101<br>(52-181)       | 123.8%<br>(63.4%-175.9%)  | 3421<br>(1601-6199)    | 32.4%<br>(25.9%-39.2%) | 1897<br>(971-3534)        | 138.1%<br>(70.6%-190.8%)  |
| <b>Central Europe</b>            | 2849874<br>(2451339-3276016)    | 35.4%<br>(32.4%-38.8%) | 262490<br>(225127-303309)    | 27.9%<br>(24.4%-31.6%) | 4004<br>(1934-7372)   | 116.3%<br>(47.9%-194.7%)  | 12853<br>(6176-23498)  | 28.8%<br>(23.9%-35.0%) | 60156<br>(29168-113573)   | 85.8%<br>(30.9%-148.6%)   |
| <b>Eastern Europe</b>            | 5908656<br>(5117977-6767587)    | 26.7%<br>(24.5%-29.1%) | 530342<br>(458792-609014)    | 21.5%<br>(19.3%-24.0%) | 12331<br>(5956-23564) | 90.2%<br>(32.1%-130.5%)   | 26864<br>(12865-49225) | 21.3%<br>(16.3%-27.1%) | 198594<br>(92879-386142)  | 74.7%<br>(16.8%-115.6%)   |
| <b>Australasia</b>               | 625086<br>(539710-712347)       | 35.0%<br>(29.6%-40.3%) | 54525<br>(46977-62630)       | 31.1%<br>(26.2%-36.3%) | 1455<br>(697-2744)    | 220.3%<br>(68.2%-321.1%)  | 2355<br>(1114-4265)    | 31.0%<br>(22.2%-40.6%) | 15820<br>(7596-30166)     | 168.7%<br>(33.3%-255.2%)  |
| <b>High-income Asia Pacific</b>  | 6036002<br>(5210182-6898991)    | 37.4%<br>(31.6%-43.8%) | 489495<br>(426049-565312)    | 26.1%<br>(20.0%-33.1%) | 1282<br>(651-2114)    | 240.4%<br>(132.3%-443.2%) | 24680<br>(11717-44731) | 42.4%<br>(32.4%-54.9%) | 14139<br>(7621-24364)     | 141.9%<br>(68.2%-258.8%)  |
| <b>High-income North America</b> | 13961440<br>(12552572-15445785) | 25.6%<br>(17.7%-35.6%) | 1191366<br>(1063013-1335557) | 26.2%<br>(18.1%-35.6%) | 15958<br>(7777-29844) | 154.7%<br>(104.4%-193.0%) | 50935<br>(23761-90890) | 25.8%<br>(16.1%-36.3%) | 209196<br>(101860-395722) | 130.6%<br>(88.2%-163.7%)  |
| <b>Southern Latin America</b>    | 1316077<br>(1125201-1494772)    | 38.7%<br>(33.8%-44.4%) | 120461<br>(104212-138563)    | 32.5%<br>(27.8%-37.9%) | 553<br>(263-1038)     | 238.3%<br>(147.7%-309.2%) | 5636<br>(2646-10152)   | 28.7%<br>(21.6%-37.8%) | 7536<br>(3622-14329)      | 196.1%<br>(115.8%-259.0%) |
| <b>Western Europe</b>            | 17338264                        | 3.3%<br>(1.4%-5.3%)    | 1393111                      | 0.2%<br>(-1.8%-2.4%)   | 21922                 | 120.3%                    | 71984                  | -3.2%<br>(-6.9%-0.8%)  | 251178                    | 87.7%<br>(34.8%-120.7%)   |

|                                     |                                 |                           |                              |                           |                     |                           |                          |                           |                        |                           |
|-------------------------------------|---------------------------------|---------------------------|------------------------------|---------------------------|---------------------|---------------------------|--------------------------|---------------------------|------------------------|---------------------------|
|                                     | (14957430-19677419)             |                           | (1215264-1597268)            |                           | (10276-40349)       | (62.1%-163.4%)            | (33793-130193)           |                           | (119208-479586)        |                           |
| <b>Andean Latin America</b>         | 454206<br>(392058-520945)       | 176.2%<br>(167.2%-184.6%) | 46920<br>(40588-53969)       | 167.0%<br>(158.3%-174.8%) | 71<br>(52-89)       | 294.3%<br>(200.1%-416.8%) | 2185<br>(1020-3973)      | 144.1%<br>(130.6%-158.9%) | 953<br>(716-1194)      | 259.0%<br>(174.7%-370.6%) |
| <b>Caribbean</b>                    | 511218<br>(440162-585168)       | 93.7%<br>(89.4%-98.0%)    | 51482<br>(44448-59163)       | 88.3%<br>(84.1%-93.0%)    | 1024<br>(537-1803)  | 183.9%<br>(95.1%-250.9%)  | 2446<br>(1166-4399)      | 80.3%<br>(72.6%-89.1%)    | 14588<br>(7719-25844)  | 153.1%<br>(74.8%-212.9%)  |
| <b>Central Latin America</b>        | 2392336<br>(2073987-2739949)    | 153.5%<br>(149.2%-158.2%) | 245047<br>(211434-281535)    | 146.7%<br>(142.1%-151.3%) | 1298<br>(632-2562)  | 276.8%<br>(122.4%-422.0%) | 11222<br>(5257-20137)    | 135.8%<br>(127.1%-146.9%) | 17737<br>(8566-35692)  | 234.2%<br>(95.4%-366.7%)  |
| <b>Tropical Latin America</b>       | 2233807<br>(1944381-2556679)    | 126.4%<br>(121.8%-131.8%) | 229885<br>(198050-263869)    | 117.7%<br>(113.1%-122.8%) | 2794<br>(1281-5177) | 282.5%<br>(174.9%-422.7%) | 10643<br>(5013-19411)    | 115.4%<br>(105.1%-128.1%) | 44094<br>(20308-83166) | 221.3%<br>(133.4%-331.8%) |
| <b>North Africa and Middle East</b> | 4483708<br>(3873089-5120535)    | 157.0%<br>(153.1%-161.0%) | 470128<br>(407448-537521)    | 152.8%<br>(148.4%-157.2%) | 1339<br>(1093-1831) | 239.2%<br>(154.5%-335.1%) | 18907<br>(8866-34351)    | 118.9%<br>(111.8%-128.6%) | 22229<br>(18309-28035) | 195.8%<br>(113.5%-283.3%) |
| <b>South Asia</b>                   | 12004464<br>(10387163-13752790) | 165.9%<br>(159.7%-172.3%) | 1286587<br>(1106373-1476216) | 153.8%<br>(148.0%-160.1%) | 2964<br>(2160-3795) | 439.0%<br>(248.3%-585.1%) | 58013<br>(27257-103644)  | 157.0%<br>(145.7%-172.1%) | 49750<br>(37108-63767) | 374.2%<br>(203.9%-512.2%) |
| <b>East Asia</b>                    | 29589160<br>(25557455-33841453) | 172.9%<br>(168.8%-177.3%) | 2711137<br>(2334791-3113092) | 153.0%<br>(148.9%-157.0%) | 2279<br>(1874-2830) | 262.7%<br>(157.0%-358.9%) | 135332<br>(61923-243445) | 133.7%<br>(120.5%-150.0%) | 36737<br>(30206-44656) | 202.6%<br>(112.4%-288.0%) |
| <b>Oceania</b>                      | 92183<br>(78753-105437)         | 163.2%<br>(155.4%-171.6%) | 9894<br>(8500-11350)         | 161.5%<br>(152.8%-171.1%) | 9<br>(7-13)         | 276.0%<br>(191.3%-394.0%) | 451<br>(208-807)         | 145.2%<br>(130.5%-160.3%) | 188<br>(139-275)       | 265.3%<br>(179.7%-393.5%) |

|                                    |                               |                           |                            |                           |                    |                           |                        |                           |                        |                           |
|------------------------------------|-------------------------------|---------------------------|----------------------------|---------------------------|--------------------|---------------------------|------------------------|---------------------------|------------------------|---------------------------|
| <b>Southeast Asia</b>              | 8805691<br>(7584637-10038684) | 158.4%<br>(154.4%-162.1%) | 876385<br>(758564-1002747) | 149.8%<br>(146.2%-153.2%) | 913<br>(717-1128)  | 303.4%<br>(224.6%-378.6%) | 42887<br>(20031-76413) | 134.6%<br>(126.6%-143.8%) | 16561<br>(12891-20407) | 284.0%<br>(204.8%-363.3%) |
| <b>Central Sub-Saharan Africa</b>  | 489866<br>(419830-560169)     | 135.4%<br>(126.5%-144.0%) | 56336<br>(48531-64854)     | 133.3%<br>(124.2%-142.9%) | 800<br>(408-1271)  | 130.4%<br>(57.6%-294.4%)  | 2456<br>(1129-4402)    | 116.9%<br>(101.9%-132.0%) | 16614<br>(8574-26885)  | 122.3%<br>(52.3%-279.1%)  |
| <b>Eastern Sub-Saharan Africa</b>  | 1349014<br>(1160033-1547847)  | 126.3%<br>(123.2%-129.5%) | 153080<br>(132225-175448)  | 124.1%<br>(120.6%-128.0%) | 1604<br>(852-2134) | 213.5%<br>(133.2%-302.3%) | 6805<br>(3186-12174)   | 106.3%<br>(99.7%-114.3%)  | 30214<br>(17081-39880) | 192.1%<br>(116.0%-279.9%) |
| <b>Southern Sub-Saharan Africa</b> | 676050<br>(584849-774097)     | 78.2%<br>(75.2%-81.4%)    | 69933<br>(60300-80477)     | 82.5%<br>(79.3%-86.0%)    | 913<br>(722-1030)  | 201.5%<br>(155.0%-246.5%) | 3334<br>(1568-6000)    | 65.7%<br>(60.8%-71.4%)    | 18702<br>(14785-21249) | 191.9%<br>(143.9%-239.5%) |
| <b>Western Sub-Saharan Africa</b>  | 1516753<br>(1304684-1737206)  | 123.5%<br>(120.5%-126.8%) | 170050<br>(146947-195012)  | 125.0%<br>(120.4%-130.0%) | 452<br>(247-603)   | 183.6%<br>(81.8%-302.8%)  | 7484<br>(3475-13479)   | 99.7%<br>(94.1%-105.7%)   | 8604<br>(4520-11702)   | 172.2%<br>(74.6%-290.9%)  |

**Data in parentheses are 95% uncertainty intervals.**

**SDI, socio-demographic index; YLDs, years lived with disability; YLLs, years of life lost.**
