# Supplementary material for: Burden of Peripheral Artery Disease and Its Attributable Risk Factors in 204 Countries and Territories From 1990 to 2019
Source: PubMed Central journal article supplement (PMC9039520; doi:10.3389/fcvm.2022.868370), 2022-04-12
Supplement: Table_2.pdf [file Table_2.pdf]

**Table S2. Number of peripheral artery disease prevalent cases, incident cases, deaths, YLDs, and YLLs in 2019, by sex, SDI quintile, and location**

|                             | Prevalence                          |                                     | Incidence                        |                                  | Deaths                     |                            | YLDs                          |                              | YLLs                          |                                |
|-----------------------------|-------------------------------------|-------------------------------------|----------------------------------|----------------------------------|----------------------------|----------------------------|-------------------------------|------------------------------|-------------------------------|--------------------------------|
|                             | Females                             | Males                               | Females                          | Males                            | Females                    | Males                      | Females                       | Males                        | Females                       | Males                          |
| <b>Global</b>               | 76093176<br>(66587165-<br>86171494) | 37349840<br>(32514726-<br>42646806) | 6779114<br>(5913971-<br>7748629) | 3724977<br>(3237508-<br>4255580) | 36353<br>(15769-<br>74771) | 37710<br>(17621-<br>79468) | 337049<br>(158788-<br>607776) | 163844<br>(76301-<br>293204) | 433066<br>(199652-<br>874595) | 602422<br>(294021-<br>1237247) |
| <b>Low SDI</b>              | 2594558<br>(2233371-<br>2986790)    | 1760047<br>(1510827-<br>2027349)    | 289189<br>(248609-<br>330269)    | 180929<br>(156022-<br>207001)    | 966<br>(283-<br>1758)      | 1718<br>(1011-<br>2363)    | 12895<br>(6045-<br>23021)     | 8984<br>(4171-<br>15943)     | 16479<br>(4787-<br>30403)     | 34585<br>(19652-<br>48360)     |
| <b>Low-<br/>middle SDI</b>  | 8625565<br>(7478559-<br>9858042)    | 4784549<br>(4123015-<br>5477045)    | 886656<br>(767360-<br>1015041)   | 511653<br>(439339-<br>587034)    | 1670<br>(999-<br>2383)     | 2051<br>(1577-<br>2738)    | 42535<br>(19929-<br>76994)    | 23496<br>(11055-<br>41687)   | 25570<br>(15006-<br>35400)    | 37077<br>(29115-<br>48166)     |
| <b>Middle SDI</b>           | 21142080<br>(18226337-<br>24193557) | 9434683<br>(8099524-<br>10822104)   | 2016503<br>(1746597-<br>2313794) | 898597<br>(774488-<br>1030187)   | 3079<br>(2000-<br>5036)    | 3565<br>(2655-<br>5299)    | 99812<br>(45772-<br>180607)   | 41699<br>(19452-<br>75202)   | 44316<br>(29318-<br>71634)    | 64924<br>(49513-<br>93003)     |
| <b>High-<br/>middle SDI</b> | 22230932<br>(19382721-<br>25300155) | 8524538<br>(7375432-<br>9814253)    | 1909340<br>(1656985-<br>2183880) | 836656<br>(719297-<br>961717)    | 12368<br>(4756-<br>25883)  | 13876<br>(5618-<br>31204)  | 99736<br>(47085-<br>179657)   | 36135<br>(16728-<br>64491)   | 147610<br>(58681-<br>308662)  | 237194<br>(95730-<br>530631)   |
| <b>High SDI</b>             | 21466185<br>(18966882-<br>24046883) | 12825614<br>(11257997-<br>14481213) | 1674295<br>(1484428-<br>1897718) | 1181446<br>(1035584-<br>1343117) | 18242<br>(6590-<br>39883)  | 16472<br>(5825-<br>38101)  | 81917<br>(38412-<br>148749)   | 53437<br>(24838-<br>96948)   | 198738<br>(72596-<br>438182)  | 228201<br>(80080-<br>530753)   |
| <b>Central<br/>Asia</b>     | 527948<br>(456898-603461)           | 281213                              | 54240<br>(46786-62487)           | 31199                            | 46<br>(19-94)              | 55<br>(21-125)             | 2253                          | 1168                         | 696                           | 1201                           |

|                     |                           |                        |                        |                     |              |              |                   |                  |                 |                 |
|---------------------|---------------------------|------------------------|------------------------|---------------------|--------------|--------------|-------------------|------------------|-----------------|-----------------|
|                     |                           | (241907-321698)        |                        | (26691-35862)       |              |              | (1060-4095)       | (534-2126)       | (298-1422)      | (452-2769)      |
| <b>Armenia</b>      | 38088<br>(32534-43766)    | 19447<br>(16906-22299) | 3565<br>(3072-4152)    | 2007<br>(1716-2311) | 7<br>(2-14)  | 5<br>(2-12)  | 172<br>(82-314)   | 90<br>(42-160)   | 86<br>(30-180)  | 98<br>(32-241)  |
| <b>Azerbaijan</b>   | 67544<br>(58217-78422)    | 38764<br>(33247-44534) | 7007<br>(6006-8193)    | 4273<br>(3628-4973) | 3<br>(1-4)   | 2<br>(2-3)   | 282<br>(134-512)  | 162<br>(75-297)  | 38<br>(23-54)   | 40<br>(30-54)   |
| <b>Georgia</b>      | 58163<br>(49990-67168)    | 26271<br>(22569-30192) | 5158<br>(4424-5982)    | 2678<br>(2279-3097) | 6<br>(2-11)  | 6<br>(2-16)  | 287<br>(136-516)  | 128<br>(59-230)  | 67<br>(20-134)  | 115<br>(35-284) |
| <b>Kazakhstan</b>   | 136466<br>(117873-157275) | 63875<br>(54710-73193) | 13372<br>(11515-15525) | 6922<br>(5941-8043) | 11<br>(4-23) | 12<br>(4-28) | 590<br>(278-1064) | 262<br>(118-476) | 159<br>(60-337) | 267<br>(90-638) |
| <b>Kyrgyzstan</b>   | 29963<br>(25756-34405)    | 15942<br>(13724-18280) | 3155<br>(2713-3664)    | 1795<br>(1539-2079) | 7<br>(3-17)  | 12<br>(4-28) | 131<br>(62-243)   | 67<br>(32-121)   | 101<br>(37-231) | 245<br>(81-584) |
| <b>Mongolia</b>     | 15403<br>(13256-17732)    | 8595<br>(7375-9865)    | 1658<br>(1431-1908)    | 972<br>(841-1127)   | 1<br>(0-1)   | 1<br>(0-1)   | 65<br>(30-120)    | 35<br>(16-63)    | 10<br>(7-20)    | 10<br>(8-13)    |
| <b>Tajikistan</b>   | 29498<br>(25086-34148)    | 19653<br>(16648-22744) | 3338<br>(2823-3882)    | 2283<br>(1928-2671) | 1<br>(1-2)   | 1<br>(1-2)   | 121<br>(56-220)   | 83<br>(37-151)   | 18<br>(11-24)   | 25<br>(19-32)   |
| <b>Turkmenistan</b> | 27250<br>(23416-31135)    | 14984<br>(12876-17213) | 2738<br>(2339-3161)    | 1630<br>(1405-1884) | 3<br>(1-7)   | 4<br>(1-10)  | 120<br>(57-217)   | 63<br>(29-114)   | 53<br>(17-103)  | 102<br>(33-246) |

|                               |                              |                            |                           |                         |                    |                    |                      |                     |                       |                        |
|-------------------------------|------------------------------|----------------------------|---------------------------|-------------------------|--------------------|--------------------|----------------------|---------------------|-----------------------|------------------------|
| <b>Uzbekistan</b>             | 125572<br>(105604-146800)    | 73682<br>(62378-85550)     | 14248<br>(11909-16623)    | 8639<br>(7214-10125)    | 8<br>(3-19)        | 12<br>(4-28)       | 484<br>(223-890)     | 279<br>(128-502)    | 164<br>(68-379)       | 300<br>(102-733)       |
| <b>Central Europe</b>         | 1880121<br>(1616169-2158014) | 969753<br>(836519-1112751) | 165091<br>(142335-192222) | 97398<br>(83512-111869) | 1859<br>(670-3726) | 2145<br>(826-4985) | 8538<br>(4045-15628) | 4315<br>(2033-7836) | 22727<br>(8320-45317) | 37430<br>(14247-86839) |
| <b>Albania</b>                | 31099<br>(26685-35718)       | 21797<br>(18618-25213)     | 2871<br>(2462-3316)       | 2185<br>(1847-2536)     | 3<br>(1-4)         | 5<br>(4-8)         | 137<br>(64-252)      | 99<br>(46-180)      | 37<br>(19-56)         | 90<br>(62-130)         |
| <b>Bosnia and Herzegovina</b> | 55485<br>(47495-63930)       | 33901<br>(28871-39063)     | 5143<br>(4418-5955)       | 3459<br>(2934-4012)     | 11<br>(6-15)       | 15<br>(11-20)      | 249<br>(120-463)     | 152<br>(72-274)     | 139<br>(78-193)       | 252<br>(183-330)       |
| <b>Bulgaria</b>               | 123167<br>(104564-142284)    | 69492<br>(59214-80257)     | 11021<br>(9412-12890)     | 6953<br>(5943-8044)     | 40<br>(14-89)      | 50<br>(17-123)     | 587<br>(273-1095)    | 328<br>(154-597)    | 524<br>(188-1144)     | 893<br>(296-2212)      |
| <b>Croatia</b>                | 71472<br>(60906-82289)       | 40327<br>(34390-46618)     | 6150<br>(5311-7200)       | 3969<br>(3393-4582)     | 99<br>(29-192)     | 120<br>(39-293)    | 306<br>(145-569)     | 171<br>(81-313)     | 1159<br>(350-2306)    | 1989<br>(654-4774)     |
| <b>Czechia</b>                | 179431<br>(152937-208225)    | 106343<br>(90297-123242)   | 15348<br>(13073-18044)    | 10356<br>(8900-11981)   | 218<br>(81-505)    | 238<br>(83-578)    | 775<br>(369-1425)    | 455<br>(217-833)    | 2654<br>(987-6194)    | 4153<br>(1418-10069)   |
| <b>Hungary</b>                | 185163<br>(157353-214886)    | 94008<br>(80801-108372)    | 15928<br>(13626-18639)    | 9329<br>(7990-10740)    | 436<br>(156-1108)  | 575<br>(191-1446)  | 833<br>(390-1527)    | 411<br>(196-745)    | 5475<br>(2018-13953)  | 10104<br>(3431-25053)  |
| <b>Montenegro</b>             | 9290<br>(7956-10769)         | 5800<br>(4942-6716)        | 850<br>(726-982)          | 586<br>(499-683)        | 1<br>(1-2)         | 2<br>(1-2)         | 40<br>(19-74)        | 25<br>(12-45)       | 15<br>(10-22)         | 29<br>(22-38)          |

|                        |                              |                            |                           |                          |                      |                      |                        |                     |                         |                          |
|------------------------|------------------------------|----------------------------|---------------------------|--------------------------|----------------------|----------------------|------------------------|---------------------|-------------------------|--------------------------|
| <b>North Macedonia</b> | 24896<br>(21306-28668)       | 17601<br>(15033-20288)     | 2440<br>(2106-2850)       | 1851<br>(1573-2145)      | 3<br>(1-4)           | 4<br>(3-6)           | 107<br>(51-199)        | 77<br>(36-139)      | 38<br>(19-53)           | 84<br>(60-115)           |
| <b>Poland</b>          | 667965<br>(574732-765153)    | 270095<br>(232998-311372)  | 57616<br>(49818-66889)    | 27541<br>(23492-31909)   | 663<br>(158-1582)    | 478<br>(137-1271)    | 3084<br>(1480-5607)    | 1202<br>(565-2162)  | 7731<br>(1876-18006)    | 8462<br>(2432-22398)     |
| <b>Romania</b>         | 293726<br>(249941-338410)    | 165734<br>(142666-190652)  | 26108<br>(22293-30323)    | 16550<br>(14141-19093)   | 264<br>(97-579)      | 511<br>(170-1201)    | 1371<br>(641-2516)     | 757<br>(358-1365)   | 3401<br>(1225-7225)     | 8774<br>(2896-20351)     |
| <b>Serbia</b>          | 133772<br>(114418-155746)    | 86024<br>(74241-99363)     | 12448<br>(10539-14518)    | 8717<br>(7481-10139)     | 61<br>(24-86)        | 77<br>(59-99)        | 597<br>(280-1118)      | 392<br>(185-718)    | 829<br>(320-1174)       | 1309<br>(1008-1693)      |
| <b>Slovakia</b>        | 70389<br>(60018-80398)       | 38770<br>(33228-44486)     | 6343<br>(5420-7286)       | 3974<br>(3368-4627)      | 44<br>(12-65)        | 49<br>(36-64)        | 306<br>(144-558)       | 164<br>(78-303)     | 553<br>(153-800)        | 954<br>(691-1299)        |
| <b>Slovenia</b>        | 34266<br>(29706-39425)       | 19862<br>(17127-22706)     | 2823<br>(2438-3283)       | 1929<br>(1659-2232)      | 16<br>(2-43)         | 20<br>(2-51)         | 145<br>(69-266)        | 83<br>(39-149)      | 172<br>(25-487)         | 337<br>(22-858)          |
| <b>Eastern Europe</b>  | 4918240<br>(4253830-5648795) | 990416<br>(856058-1134815) | 425386<br>(368217-488296) | 104956<br>(90137-121039) | 5743<br>(2041-12886) | 6588<br>(2169-16007) | 22565<br>(10844-41580) | 4299<br>(2021-7636) | 72861<br>(26068-163620) | 125733<br>(41024-304182) |
| <b>Belarus</b>         | 177277<br>(151927-203920)    | 58026<br>(49982-66670)     | 15793<br>(13596-18280)    | 6171<br>(5294-7185)      | 94<br>(24-215)       | 81<br>(24-219)       | 783<br>(369-1431)      | 243<br>(116-439)    | 1153<br>(301-2646)      | 1527<br>(439-4018)       |
| <b>Estonia</b>         | 30381<br>(26015-35193)       | 10130                      | 2425<br>(2106-2820)       | 999                      | 4<br>(1-10)          | 3<br>(1-6)           | 138<br>(64-257)        | 44<br>(20-81)       | 49<br>(13-103)          | 44<br>(13-101)           |

|                            |                              |                           |                           |                        |                     |                      |                       |                     |                         |                         |
|----------------------------|------------------------------|---------------------------|---------------------------|------------------------|---------------------|----------------------|-----------------------|---------------------|-------------------------|-------------------------|
|                            |                              | (8679-11646)              |                           | (858-1155)             |                     |                      |                       |                     |                         |                         |
| <b>Latvia</b>              | 45581<br>(38867-52587)       | 14437<br>(12367-16550)    | 3719<br>(3198-4328)       | 1441<br>(1235-1667)    | 19<br>(3-62)        | 10<br>(3-41)         | 214<br>(100-389)      | 65<br>(30-118)      | 223<br>(39-723)         | 177<br>(45-702)         |
| <b>Lithuania</b>           | 63170<br>(53607-73327)       | 20638<br>(17802-23586)    | 5134<br>(4418-5978)       | 2036<br>(1751-2341)    | 42<br>(13-83)       | 46<br>(14-106)       | 297<br>(141-551)      | 94<br>(43-168)      | 483<br>(154-957)        | 781<br>(242-1805)       |
| <b>Republic of Moldova</b> | 57860<br>(49680-67176)       | 22647<br>(19542-26058)    | 5551<br>(4740-6444)       | 2422<br>(2079-2806)    | 15<br>(4-29)        | 19<br>(5-52)         | 269<br>(129-498)      | 104<br>(48-187)     | 197<br>(54-408)         | 346<br>(99-1068)        |
| <b>Russian Federation</b>  | 3440493<br>(2979217-3933665) | 651677<br>(562833-744850) | 295511<br>(255007-341855) | 69221<br>(58982-79895) | 4154<br>(1473-9618) | 4898<br>(1650-12002) | 15668<br>(7452-28727) | 2801<br>(1310-4932) | 52749<br>(18444-121093) | 94398<br>(31127-231470) |
| <b>Ukraine</b>             | 1103479<br>(943326-1271690)  | 212862<br>(183319-244074) | 97253<br>(84139-111491)   | 22666<br>(19577-26159) | 1414<br>(476-2969)  | 1531<br>(514-3553)   | 5195<br>(2508-9526)   | 949<br>(444-1705)   | 18008<br>(6213-38617)   | 28460<br>(9557-65604)   |
| <b>Australasia</b>         | 414624<br>(358679-471568)    | 210463<br>(178554-242228) | 34339<br>(29660-39299)    | 20186<br>(17170-23326) | 771<br>(286-1754)   | 684<br>(228-1632)    | 1508<br>(716-2735)    | 847<br>(403-1535)   | 7407<br>(2797-17143)    | 8413<br>(2818-20040)    |
| <b>Australia</b>           | 349538<br>(302350-398107)    | 178490<br>(151228-206002) | 28769<br>(24743-32980)    | 17066<br>(14490-19716) | 674<br>(254-1538)   | 584<br>(195-1398)    | 1265<br>(605-2279)    | 716<br>(341-1284)   | 6463<br>(2472-14988)    | 7216<br>(2431-17173)    |
| <b>New Zealand</b>         | 65085<br>(56337-74243)       | 31973<br>(27326-37171)    | 5570<br>(4814-6409)       | 3119<br>(2661-3646)    | 97<br>(34-217)      | 99<br>(34-240)       | 243<br>(116-439)      | 131<br>(61-241)     | 943<br>(332-2187)       | 1198<br>(405-2904)      |

|                                  |                              |                              |                           |                           |                      |                      |                        |                        |                          |                          |
|----------------------------------|------------------------------|------------------------------|---------------------------|---------------------------|----------------------|----------------------|------------------------|------------------------|--------------------------|--------------------------|
| <b>High-income Asia Pacific</b>  | 4537563<br>(3913246-5176480) | 1498439<br>(1289946-1720926) | 345309<br>(301449-397954) | 144187<br>(123675-166525) | 652<br>(242-1190)    | 629<br>(289-1321)    | 18273<br>(8738-33145)  | 6407<br>(3000-11633)   | 5811<br>(2292-10862)     | 8328<br>(3969-17256)     |
| <b>Brunei Darussalam</b>         | 2677<br>(2308-3068)          | 1297<br>(1096-1513)          | 250<br>(214-288)          | 150<br>(127-175)          | 1<br>(1-1)           | 1<br>(1-1)           | 9<br>(4-16)            | 5<br>(2-9)             | 13<br>(9-18)             | 15<br>(11-19)            |
| <b>Japan</b>                     | 3725981<br>(3211057-4264898) | 1139521<br>(975176-1312567)  | 275836<br>(239862-320321) | 106316<br>(91043-123647)  | 552<br>(156-1076)    | 492<br>(159-1171)    | 15355<br>(7346-28034)  | 5030<br>(2374-9087)    | 4756<br>(1436-9560)      | 6318<br>(2066-14960)     |
| <b>Republic of Korea</b>         | 753125<br>(651569-861288)    | 329428<br>(281449-378356)    | 64375<br>(55912-74662)    | 34803<br>(29584-40423)    | 81<br>(47-110)       | 124<br>(99-153)      | 2711<br>(1259-4964)    | 1264<br>(596-2322)     | 828<br>(528-1128)        | 1807<br>(1442-2228)      |
| <b>Singapore</b>                 | 55780<br>(48381-63199)       | 28193<br>(24043-32322)       | 4847<br>(4163-5623)       | 2918<br>(2472-3386)       | 19<br>(4-45)         | 12<br>(3-31)         | 198<br>(92-366)        | 108<br>(50-197)        | 215<br>(47-499)          | 188<br>(54-501)          |
| <b>High-income North America</b> | 7912242<br>(7148780-8722982) | 6049198<br>(5397542-6774730) | 633448<br>(566758-708615) | 557919<br>(495058-624266) | 8510<br>(3082-18643) | 7448<br>(2493-17707) | 26548<br>(12437-47563) | 24387<br>(11325-43983) | 101705<br>(37157-225251) | 107491<br>(35390-257094) |
| <b>Canada</b>                    | 852833<br>(735709-975892)    | 645543<br>(552067-748941)    | 67925<br>(58486-78508)    | 58615<br>(49868-67725)    | 745<br>(266-1631)    | 684<br>(223-1671)    | 2914<br>(1352-5316)    | 2593<br>(1216-4821)    | 8638<br>(3195-19274)     | 9925<br>(3256-24224)     |
| <b>Greenland</b>                 | 730<br>(634-827)             | 738<br>(636-857)             | 62<br>(54-72)             | 77<br>(65-90)             | 1<br>(0-1)           | 1<br>(0-1)           | 3<br>(1-5)             | 3<br>(2-6)             | 10<br>(7-17)             | 11<br>(8-14)             |

|                                 |                                |                              |                           |                           |                       |                       |                        |                        |                          |                          |
|---------------------------------|--------------------------------|------------------------------|---------------------------|---------------------------|-----------------------|-----------------------|------------------------|------------------------|--------------------------|--------------------------|
| <b>United States of America</b> | 7058554<br>(6384040-7755052)   | 5402821<br>(4838541-6025629) | 565451<br>(506864-630808) | 499218<br>(442670-556636) | 7765<br>(2818-17048)  | 6763<br>(2270-16107)  | 23631<br>(11150-42819) | 21791<br>(10165-39284) | 93055<br>(33953-205625)  | 97554<br>(32225-232283)  |
| <b>Southern Latin America</b>   | 867397<br>(742992-986326)      | 448680<br>(383823-519771)    | 74738<br>(64665-85702)    | 45722<br>(38936-52862)    | 248<br>(86-546)       | 305<br>(104-732)      | 3595<br>(1675-6587)    | 2041<br>(953-3656)     | 2915<br>(1030-6488)      | 4621<br>(1561-11094)     |
| <b>Argentina</b>                | 562224<br>(479695-645883)      | 286314<br>(244613-331945)    | 48714<br>(41916-56318)    | 29418<br>(24987-34248)    | 119<br>(43-268)       | 138<br>(47-329)       | 2384<br>(1118-4374)    | 1331<br>(614-2437)     | 1392<br>(508-3110)       | 2140<br>(727-5136)       |
| <b>Chile</b>                    | 240563<br>(206237-274127)      | 131629<br>(112511-153616)    | 20798<br>(17871-23886)    | 13307<br>(11386-15431)    | 124<br>(42-262)       | 164<br>(55-395)       | 933<br>(441-1721)      | 567<br>(261-1006)      | 1475<br>(509-3196)       | 2437<br>(820-5962)       |
| <b>Uruguay</b>                  | 64566<br>(55136-73413)         | 30714<br>(26244-35559)       | 5223<br>(4521-5981)       | 2996<br>(2549-3471)       | 4<br>(2-10)           | 3<br>(1-7)            | 278<br>(131-511)       | 143<br>(68-259)        | 48<br>(18-110)           | 43<br>(15-104)           |
| <b>Western Europe</b>           | 11051342<br>(9538410-12513819) | 6286922<br>(5412205-7202215) | 828069<br>(721431-952886) | 565042<br>(487621-648742) | 11219<br>(3809-24170) | 10703<br>(3647-25385) | 44876<br>(21361-80698) | 27108<br>(12833-48797) | 110592<br>(38388-241341) | 140586<br>(47690-330002) |
| <b>Andorra</b>                  | 1561<br>(1352-1768)            | 1112<br>(949-1278)           | 117<br>(102-134)          | 102<br>(87-118)           | 1<br>(1-2)            | 1<br>(1-2)            | 6<br>(3-10)            | 4<br>(2-8)             | 14<br>(7-23)             | 19<br>(12-27)            |
| <b>Austria</b>                  | 220315<br>(189210-253306)      | 127880<br>(109314-147545)    | 16428<br>(14280-19007)    | 11538<br>(10016-13304)    | 343<br>(122-776)      | 389<br>(133-933)      | 878<br>(420-1603)      | 538<br>(247-993)       | 3311<br>(1169-7545)      | 5176<br>(1787-12381)     |
| <b>Belgium</b>                  | 305058<br>(262700-348829)      | 182082<br>(156301-210007)    | 22342<br>(19375-25826)    | 16237<br>(14048-18805)    | 174<br>(62-403)       | 155<br>(52-376)       | 1223<br>(572-2225)     | 779<br>(367-1443)      | 1688<br>(595-3924)       | 2052<br>(697-4916)       |

|                |                              |                              |                           |                           |                     |                     |                      |                      |                        |                         |
|----------------|------------------------------|------------------------------|---------------------------|---------------------------|---------------------|---------------------|----------------------|----------------------|------------------------|-------------------------|
| <b>Cyprus</b>  | 25475<br>(21932-29348)       | 16999<br>(14416-19605)       | 2074<br>(1785-2400)       | 1609<br>(1365-1856)       | 11<br>(4-16)        | 8<br>(6-10)         | 95<br>(44-177)       | 72<br>(33-131)       | 119<br>(45-162)        | 122<br>(97-151)         |
| <b>Denmark</b> | 185031<br>(159587-212466)    | 124248<br>(105304-144713)    | 13654<br>(11678-15824)    | 10789<br>(9165-12667)     | 195<br>(73-456)     | 150<br>(52-361)     | 741<br>(351-1370)    | 545<br>(254-979)     | 2005<br>(758-4613)     | 2017<br>(689-4848)      |
| <b>Finland</b> | 143321<br>(123488-164014)    | 84369<br>(71516-97893)       | 10992<br>(9415-12757)     | 7712<br>(6554-9005)       | 117<br>(32-238)     | 90<br>(29-210)      | 588<br>(276-1069)    | 367<br>(171-666)     | 1102<br>(309-2149)     | 1163<br>(384-2729)      |
| <b>France</b>  | 1607187<br>(1383467-1830059) | 905657<br>(774005-1039488)   | 119144<br>(102956-138641) | 81373<br>(69424-94082)    | 663<br>(222-1500)   | 586<br>(189-1402)   | 6573<br>(3128-11974) | 3955<br>(1844-7106)  | 6084<br>(2095-14034)   | 7450<br>(2370-17812)    |
| <b>Germany</b> | 2248565<br>(1947921-2566126) | 1383290<br>(1182226-1594539) | 166765<br>(144449-191741) | 122268<br>(105388-140905) | 3845<br>(1395-8506) | 3905<br>(1342-9076) | 9106<br>(4321-16514) | 5977<br>(2785-10906) | 39163<br>(14033-85473) | 52180<br>(17506-120687) |
| <b>Greece</b>  | 305742<br>(262077-350467)    | 186880<br>(159857-217799)    | 22572<br>(19536-25955)    | 16038<br>(13831-18598)    | 70<br>(23-146)      | 48<br>(16-116)      | 1257<br>(594-2330)   | 837<br>(395-1538)    | 707<br>(231-1465)      | 605<br>(202-1419)       |
| <b>Iceland</b> | 6294<br>(5449-7134)          | 4191<br>(3578-4807)          | 484<br>(420-560)          | 382<br>(326-442)          | 3<br>(1-6)          | 1<br>(0-3)          | 24<br>(11-44)        | 17<br>(8-32)         | 25<br>(9-58)           | 18<br>(6-44)            |
| <b>Ireland</b> | 95240<br>(82350-108233)      | 63114<br>(54210-73206)       | 7405<br>(6366-8450)       | 5769<br>(4956-6725)       | 125<br>(46-295)     | 121<br>(42-296)     | 357<br>(164-640)     | 260<br>(121-471)     | 1311<br>(468-3203)     | 1685<br>(579-4136)      |
| <b>Israel</b>  | 146055<br>(126547-167078)    | 91187<br>(78172-104550)      | 11661<br>(10063-13607)    | 8427<br>(7232-9723)       | 170<br>(63-380)     | 162<br>(56-378)     | 583<br>(273-1035)    | 400<br>(185-736)     | 1747<br>(656-3880)     | 2205<br>(749-5177)      |

|                    |                              |                            |                           |                        |                    |                    |                      |                     |                       |                       |
|--------------------|------------------------------|----------------------------|---------------------------|------------------------|--------------------|--------------------|----------------------|---------------------|-----------------------|-----------------------|
| <b>Italy</b>       | 1908498<br>(1654816-2160051) | 901808<br>(771754-1033434) | 139721<br>(122190-159810) | 81151<br>(70139-92667) | 1755<br>(603-4052) | 1860<br>(633-4560) | 7818<br>(3711-14312) | 3925<br>(1863-7100) | 16649<br>(5825-39064) | 23827<br>(8068-58508) |
| <b>Luxembourg</b>  | 13332<br>(11583-15122)       | 8335<br>(7157-9597)        | 972<br>(846-1119)         | 757<br>(654-877)       | 6<br>(2-14)        | 7<br>(2-16)        | 50<br>(24-91)        | 34<br>(16-61)       | 59<br>(20-142)        | 91<br>(30-224)        |
| <b>Malta</b>       | 12635<br>(10793-14505)       | 8040<br>(6781-9365)        | 977<br>(841-1139)         | 730<br>(612-850)       | 13<br>(4-28)       | 10<br>(3-24)       | 52<br>(24-96)        | 36<br>(16-66)       | 129<br>(43-290)       | 142<br>(48-337)       |
| <b>Monaco</b>      | 1173<br>(1010-1340)          | 748<br>(638-860)           | 82<br>(70-95)             | 60<br>(52-70)          | 0<br>(0-1)         | 0<br>(0-1)         | 5<br>(2-9)           | 3<br>(2-6)          | 5<br>(3-7)            | 6<br>(4-7)            |
| <b>Netherlands</b> | 395583<br>(342508-449101)    | 258896<br>(221178-304667)  | 30527<br>(26353-35109)    | 23562<br>(20181-27659) | 633<br>(228-1386)  | 572<br>(202-1346)  | 1543<br>(709-2865)   | 1090<br>(509-1965)  | 6482<br>(2391-14470)  | 7893<br>(2827-18645)  |
| <b>Norway</b>      | 125523<br>(109015-142320)    | 70907<br>(61141-81513)     | 9443<br>(8176-10821)      | 6427<br>(5545-7426)    | 69<br>(24-150)     | 89<br>(30-214)     | 501<br>(236-913)     | 300<br>(142-551)    | 658<br>(226-1443)     | 1174<br>(394-2852)    |
| <b>Portugal</b>    | 300985<br>(258940-345812)    | 166777<br>(141258-191681)  | 22880<br>(19875-26421)    | 15067<br>(12942-17344) | 408<br>(138-881)   | 369<br>(124-874)   | 1240<br>(582-2283)   | 742<br>(349-1356)   | 3995<br>(1353-8824)   | 4814<br>(1636-11325)  |
| <b>San Marino</b>  | 790<br>(683-897)             | 501<br>(426-575)           | 57<br>(50-66)             | 43<br>(37-50)          | 1<br>(0-1)         | 0<br>(0-0)         | 3<br>(1-6)           | 2<br>(1-4)          | 8<br>(5-12)           | 1<br>(0-1)            |
| <b>Spain</b>       | 1154742<br>(1001024-1322722) | 610463<br>(523383-702329)  | 85291<br>(74154-98529)    | 55469<br>(48097-63601) | 901<br>(292-1947)  | 989<br>(339-2286)  | 4699<br>(2254-8519)  | 2342<br>(1068-4259) | 8352<br>(2678-18300)  | 12656<br>(4335-29368) |
| <b>Sweden</b>      | 263015<br>(226649-300833)    | 154830<br>(131373-179021)  | 19749<br>(17166-22856)    | 13615<br>(11600-15910) | 182<br>(61-383)    | 114<br>(37-273)    | 1078<br>(512-1927)   | 794<br>(369-1446)   | 1724<br>(595-3719)    | 1398<br>(455-3385)    |

|                                         |                              |                           |                          |                        |                    |                   |                      |                     |                       |                       |
|-----------------------------------------|------------------------------|---------------------------|--------------------------|------------------------|--------------------|-------------------|----------------------|---------------------|-----------------------|-----------------------|
| <b>Switzerland</b>                      | 212091<br>(184412-242086)    | 130370<br>(112031-149634) | 15464<br>(13325-17929)   | 11466<br>(9871-13257)  | 153<br>(56-341)    | 156<br>(54-373)   | 831<br>(392-1513)    | 550<br>(259-998)    | 1418<br>(512-3201)    | 1995<br>(687-4732)    |
| <b>United Kingdom</b>                   | 1363496<br>(1179031-1547915) | 798756<br>(685984-917219) | 108547<br>(94284-124329) | 73958<br>(63712-84806) | 1368<br>(406-2605) | 912<br>(297-2108) | 5586<br>(2657-10194) | 3516<br>(1682-6428) | 13742<br>(4108-25939) | 11775<br>(3832-27513) |
| <b>Andean Latin America</b>             | 270740<br>(232825-311170)    | 183466<br>(157315-210099) | 27469<br>(23718-31480)   | 19451<br>(16771-22361) | 36<br>(20-48)      | 34<br>(27-43)     | 1279<br>(597-2323)   | 906<br>(425-1639)   | 457<br>(248-599)      | 496<br>(387-622)      |
| <b>Bolivia (Plurinational State of)</b> | 42833<br>(36445-49216)       | 28801<br>(24826-33281)    | 4641<br>(3951-5394)      | 3221<br>(2770-3705)    | 7<br>(3-11)        | 6<br>(4-9)        | 213<br>(101-389)     | 148<br>(68-267)     | 99<br>(43-160)        | 95<br>(62-142)        |
| <b>Ecuador</b>                          | 76108<br>(64810-88072)       | 50854<br>(43430-59133)    | 7748<br>(6671-8947)      | 5447<br>(4650-6255)    | 9<br>(5-13)        | 10<br>(7-13)      | 357<br>(165-642)     | 249<br>(116-448)    | 128<br>(73-176)       | 146<br>(108-192)      |
| <b>Peru</b>                             | 151800<br>(130400-173857)    | 103811<br>(89156-118242)  | 15080<br>(12997-17287)   | 10783<br>(9317-12434)  | 21<br>(10-30)      | 19<br>(13-26)     | 709<br>(334-1320)    | 509<br>(236-913)    | 230<br>(122-337)      | 255<br>(177-355)      |
| <b>Caribbean</b>                        | 316144<br>(272269-362078)    | 195074<br>(168049-223713) | 30973<br>(26780-35448)   | 20509<br>(17751-23602) | 531<br>(227-1092)  | 493<br>(195-1074) | 1491<br>(707-2680)   | 955<br>(451-1717)   | 6826<br>(2986-13774)  | 7762<br>(3105-17203)  |
| <b>Antigua and Barbuda</b>              | 583<br>(500-667)             | 364<br>(311-419)          | 58<br>(50-67)            | 39<br>(33-45)          | 1<br>(0-2)         | 1<br>(0-2)        | 3<br>(1-5)           | 2<br>(1-3)          | 14<br>(5-30)          | 17<br>(6-41)          |

|                           |                           |                        |                       |                     |                  |                 |                  |                  |                     |                      |
|---------------------------|---------------------------|------------------------|-----------------------|---------------------|------------------|-----------------|------------------|------------------|---------------------|----------------------|
| <b>Bahamas</b>            | 2218<br>(1912-2518)       | 1268<br>(1089-1458)    | 223<br>(193-257)      | 137<br>(118-160)    | 5<br>(2-11)      | 4<br>(1-9)      | 10<br>(5-19)     | 6<br>(3-11)      | 72<br>(26-155)      | 70<br>(23-161)       |
| <b>Barbados</b>           | 3085<br>(2652-3534)       | 1773<br>(1506-2049)    | 297<br>(255-345)      | 184<br>(157-213)    | 23<br>(9-49)     | 11<br>(4-27)    | 15<br>(7-27)     | 9<br>(4-16)      | 308<br>(116-650)    | 176<br>(60-418)      |
| <b>Belize</b>             | 1428<br>(1234-1639)       | 1050<br>(897-1209)     | 150<br>(130-173)      | 115<br>(99-133)     | 1<br>(0-1)       | 1<br>(0-2)      | 7<br>(3-12)      | 5<br>(2-9)       | 9<br>(3-20)         | 12<br>(4-29)         |
| <b>Bermuda</b>            | 814<br>(699-936)          | 439<br>(376-504)       | 71<br>(61-82)         | 43<br>(37-50)       | 3<br>(1-7)       | 2<br>(1-5)      | 4<br>(2-7)       | 2<br>(1-4)       | 36<br>(13-77)       | 30<br>(10-68)        |
| <b>Cuba</b>               | 118952<br>(101462-137650) | 73611<br>(63235-84112) | 11469<br>(9846-13267) | 7625<br>(6578-8794) | 295<br>(103-654) | 282<br>(92-648) | 534<br>(253-979) | 344<br>(165-631) | 3785<br>(1322-8165) | 4438<br>(1420-10301) |
| <b>Dominica</b>           | 513<br>(439-590)          | 336<br>(289-389)       | 50<br>(43-57)         | 36<br>(31-42)       | 1<br>(1-1)       | 1<br>(1-1)      | 3<br>(1-5)       | 2<br>(1-3)       | 11<br>(7-15)        | 13<br>(10-17)        |
| <b>Dominican Republic</b> | 54838<br>(47185-62743)    | 35490<br>(30382-40992) | 5450<br>(4694-6248)   | 3767<br>(3248-4387) | 14<br>(5-21)     | 14<br>(10-19)   | 268<br>(125-487) | 179<br>(84-321)  | 185<br>(73-276)     | 219<br>(159-297)     |
| <b>Grenada</b>            | 667<br>(573-769)          | 406<br>(344-472)       | 67<br>(57-78)         | 46<br>(39-53)       | 2<br>(1-4)       | 1<br>(0-2)      | 3<br>(2-6)       | 2<br>(1-3)       | 25<br>(9-51)        | 19<br>(6-46)         |
| <b>Guyana</b>             | 3451<br>(2953-4011)       | 2131<br>(1825-2455)    | 378<br>(323-441)      | 246<br>(210-287)    | 2<br>(1-5)       | 3<br>(1-7)      | 17<br>(8-30)     | 10<br>(5-19)     | 37<br>(12-78)       | 52<br>(17-131)       |
| <b>Haiti</b>              | 33080<br>(28102-38310)    | 21436<br>(18374-24878) | 3850<br>(3272-4448)   | 2522<br>(2167-2926) | 30<br>(15-68)    | 28<br>(17-49)   | 170<br>(78-300)  | 116<br>(55-209)  | 547<br>(269-1295)   | 541<br>(304-949)     |
| <b>Jamaica</b>            | 19739<br>(17098-22594)    | 12520<br>(10774-14297) | 1890<br>(1643-2168)   | 1311<br>(1120-1527) | 30<br>(9-56)     | 44<br>(15-106)  | 97<br>(46-176)   | 63<br>(30-112)   | 323<br>(103-656)    | 696<br>(236-1704)    |

|                                         |                              |                           |                           |                         |                   |                   |                      |                     |                      |                      |
|-----------------------------------------|------------------------------|---------------------------|---------------------------|-------------------------|-------------------|-------------------|----------------------|---------------------|----------------------|----------------------|
| <b>Puerto Rico</b>                      | 46488<br>(39624-53721)       | 25469<br>(21817-29458)    | 4053<br>(3484-4730)       | 2448<br>(2102-2852)     | 90<br>(33-205)    | 70<br>(24-167)    | 216<br>(102-391)     | 123<br>(58-220)     | 1018<br>(371-2299)   | 967<br>(328-2308)    |
| <b>Saint Kitts and Nevis</b>            | 359<br>(306-410)             | 232<br>(197-270)          | 37<br>(32-43)             | 26<br>(22-31)           | 2<br>(1-3)        | 1<br>(0-2)        | 2<br>(1-3)           | 1<br>(0-2)          | 23<br>(9-51)         | 15<br>(5-36)         |
| <b>Saint Lucia</b>                      | 1316<br>(1140-1498)          | 810<br>(694-934)          | 130<br>(112-150)          | 87<br>(75-101)          | 5<br>(2-10)       | 3<br>(1-7)        | 6<br>(3-11)          | 4<br>(2-7)          | 61<br>(22-132)       | 49<br>(17-116)       |
| <b>Saint Vincent and the Grenadines</b> | 765<br>(655-874)             | 567<br>(483-653)          | 77<br>(66-88)             | 61<br>(52-71)           | 1<br>(0-3)        | 1<br>(0-2)        | 4<br>(2-7)           | 3<br>(1-5)          | 17<br>(6-37)         | 15<br>(5-35)         |
| <b>Suriname</b>                         | 3878<br>(3319-4438)          | 2274<br>(1947-2602)       | 389<br>(335-446)          | 247<br>(212-285)        | 0<br>(0-1)        | 1<br>(1-1)        | 19<br>(9-35)         | 11<br>(5-21)        | 6<br>(4-8)           | 14<br>(11-18)        |
| <b>Trinidad and Tobago</b>              | 12133<br>(10421-14044)       | 7666<br>(6563-8885)       | 1177<br>(999-1379)        | 808<br>(691-937)        | 5<br>(1-11)       | 7<br>(2-17)       | 60<br>(28-108)       | 39<br>(18-70)       | 67<br>(20-132)       | 117<br>(36-295)      |
| <b>United States Virgin Islands</b>     | 1127<br>(958-1297)           | 624<br>(528-727)          | 107<br>(91-125)           | 64<br>(54-75)           | 4<br>(3-5)        | 2<br>(2-3)        | 6<br>(3-10)          | 3<br>(1-6)          | 53<br>(37-78)        | 38<br>(30-48)        |
| <b>Central Latin America</b>            | 1575609<br>(1365752-1804923) | 816727<br>(704566-937610) | 157683<br>(136897-181031) | 87364<br>(75199-100515) | 748<br>(287-1760) | 550<br>(193-1325) | 7285<br>(3424-13055) | 3936<br>(1854-7076) | 9746<br>(3818-23003) | 7992<br>(2801-19405) |
| <b>Colombia</b>                         | 303654<br>(262455-346625)    | 213382<br>(181533-244999) | 29667<br>(25746-34198)    | 21954<br>(18928-25224)  | 164<br>(59-403)   | 143<br>(47-347)   | 1396<br>(651-2503)   | 1028<br>(474-1867)  | 1967<br>(696-4871)   | 1949<br>(650-4725)   |

|                                                       |                           |                           |                        |                        |                   |                 |                     |                    |                      |                      |
|-------------------------------------------------------|---------------------------|---------------------------|------------------------|------------------------|-------------------|-----------------|---------------------|--------------------|----------------------|----------------------|
| <b>Costa Rica</b>                                     | 31843<br>(27289-36587)    | 19075<br>(16285-22034)    | 3094<br>(2663-3586)    | 1991<br>(1707-2314)    | 9<br>(3-18)       | 12<br>(4-28)    | 141<br>(67-250)     | 88<br>(41-157)     | 99<br>(34-211)       | 159<br>(53-397)      |
| <b>El Salvador</b>                                    | 38514<br>(33090-44191)    | 20008<br>(17203-23203)    | 3789<br>(3266-4372)    | 2097<br>(1790-2438)    | 5<br>(2-6)        | 2<br>(2-3)      | 186<br>(86-336)     | 102<br>(48-186)    | 50<br>(24-70)        | 31<br>(22-41)        |
| <b>Guatemala</b>                                      | 65409<br>(56018-75397)    | 38099<br>(32492-43836)    | 6894<br>(5945-7939)    | 4194<br>(3606-4867)    | 5<br>(2-10)       | 4<br>(1-10)     | 324<br>(150-605)    | 199<br>(91-357)    | 66<br>(25-140)       | 65<br>(23-155)       |
| <b>Honduras</b>                                       | 35333<br>(30281-40729)    | 22633<br>(19301-26075)    | 3868<br>(3330-4472)    | 2543<br>(2193-2928)    | 11<br>(4-16)      | 9<br>(6-14)     | 171<br>(78-312)     | 116<br>(55-209)    | 150<br>(57-229)      | 147<br>(101-216)     |
| <b>Mexico</b>                                         | 868024<br>(751393-994458) | 363071<br>(313283-415962) | 86838<br>(75114-99864) | 39234<br>(34015-45146) | 455<br>(169-1132) | 303<br>(95-758) | 3997<br>(1891-7205) | 1741<br>(814-3113) | 6159<br>(2378-15336) | 4512<br>(1392-11124) |
| <b>Nicaragua</b>                                      | 26960<br>(23286-31014)    | 15235<br>(12938-17567)    | 2856<br>(2475-3272)    | 1719<br>(1472-1988)    | 3<br>(2-4)        | 3<br>(2-3)      | 120<br>(56-224)     | 70<br>(32-128)     | 38<br>(24-52)        | 44<br>(34-56)        |
| <b>Panama</b>                                         | 24256<br>(20813-27747)    | 15916<br>(13703-18348)    | 2296<br>(1975-2665)    | 1627<br>(1397-1877)    | 20<br>(7-43)      | 27<br>(9-68)    | 112<br>(52-202)     | 76<br>(36-139)     | 223<br>(76-497)      | 370<br>(122-917)     |
| <b>Venezuela<br/>(Bolivarian<br/>Republic<br/>of)</b> | 181617<br>(155848-209178) | 109309<br>(93173-126114)  | 18381<br>(15672-21277) | 12007<br>(10176-13919) | 77<br>(28-185)    | 46<br>(15-112)  | 838<br>(392-1528)   | 516<br>(246-932)   | 993<br>(354-2399)    | 715<br>(239-1718)    |

|                                     |                              |                              |                           |                           |                    |                    |                       |                      |                       |                        |
|-------------------------------------|------------------------------|------------------------------|---------------------------|---------------------------|--------------------|--------------------|-----------------------|----------------------|-----------------------|------------------------|
| <b>Tropical Latin America</b>       | 1432993<br>(1245305-1644931) | 800813<br>(692091-925839)    | 143332<br>(123911-164284) | 86552<br>(74302-99945)    | 1493<br>(499-3218) | 1301<br>(423-3109) | 6795<br>(3223-12397)  | 3848<br>(1799-6971)  | 21468<br>(7069-46589) | 22626<br>(7353-52878)  |
| <b>Brazil</b>                       | 1399158<br>(1216103-1604671) | 777642<br>(671664-898706)    | 139956<br>(120983-160423) | 84053<br>(72224-97022)    | 1482<br>(488-3213) | 1289<br>(410-3092) | 6635<br>(3146-12122)  | 3736<br>(1746-6775)  | 21320<br>(6998-46479) | 22412<br>(7134-52651)  |
| <b>Paraguay</b>                     | 33835<br>(29134-38877)       | 23172<br>(19826-26885)       | 3377<br>(2903-3883)       | 2500<br>(2147-2895)       | 12<br>(4-17)       | 12<br>(9-16)       | 160<br>(74-290)       | 112<br>(53-205)      | 148<br>(55-210)       | 214<br>(152-285)       |
| <b>North Africa and Middle East</b> | 2546991<br>(2199616-2901552) | 1936717<br>(1676130-2219123) | 261640<br>(227058-299098) | 208489<br>(180329-239432) | 553<br>(412-960)   | 786<br>(647-934)   | 10534<br>(4934-19393) | 8373<br>(3926-15034) | 7828<br>(5833-12064)  | 14401<br>(11799-17298) |
| <b>Afghanistan</b>                  | 67737<br>(58115-77938)       | 48822<br>(42042-56096)       | 7735<br>(6622-8835)       | 5642<br>(4833-6508)       | 4<br>(2-8)         | 6<br>(3-9)         | 304<br>(141-544)      | 221<br>(103-390)     | 73<br>(39-140)        | 110<br>(59-175)        |
| <b>Algeria</b>                      | 197436<br>(168565-227549)    | 156867<br>(133675-181190)    | 20298<br>(17387-23463)    | 16515<br>(14219-18929)    | 24<br>(12-39)      | 52<br>(27-86)      | 817<br>(386-1485)     | 701<br>(337-1267)    | 351<br>(182-559)      | 835<br>(434-1398)      |
| <b>Bahrain</b>                      | 4753<br>(4059-5462)          | 6197<br>(5195-7182)          | 510<br>(435-592)          | 712<br>(601-836)          | 1<br>(1-2)         | 6<br>(4-8)         | 15<br>(7-28)          | 19<br>(9-35)         | 17<br>(9-23)          | 127<br>(90-174)        |
| <b>Egypt</b>                        | 327690<br>(278473-378555)    | 306410<br>(262390-357046)    | 36207<br>(30776-42164)    | 33673<br>(28866-39317)    | 28<br>(11-56)      | 47<br>(26-71)      | 1343<br>(621-2489)    | 1409<br>(662-2514)   | 485<br>(193-968)      | 835<br>(455-1285)      |
| <b>Iran (Islamic</b>                | 481141<br>(416188-548528)    | 307410                       | 48106<br>(41737-55084)    | 32149                     | 73<br>(28-90)      | 99<br>(86-111)     | 1951                  | 1317                 | 1036                  | 1629                   |

|                     |                           |                           |                        |                        |               |               |                   |                   |                  |                  |
|---------------------|---------------------------|---------------------------|------------------------|------------------------|---------------|---------------|-------------------|-------------------|------------------|------------------|
| <b>Republic of)</b> |                           | (267192-349453)           |                        | (28026-36800)          |               |               | (919-3540)        | (623-2351)        | (388-1280)       | (1454-1829)      |
| <b>Iraq</b>         | 149696<br>(128615-172212) | 107866<br>(91768-124825)  | 15652<br>(13483-17999) | 11909<br>(10200-13807) | 9<br>(6-19)   | 11<br>(8-14)  | 613<br>(287-1128) | 452<br>(210-823)  | 169<br>(115-269) | 252<br>(182-331) |
| <b>Jordan</b>       | 38933<br>(33346-44990)    | 33015<br>(28352-38167)    | 4125<br>(3528-4748)    | 3615<br>(3106-4197)    | 2<br>(1-2)    | 3<br>(2-4)    | 148<br>(69-270)   | 129<br>(59-234)   | 24<br>(17-38)    | 47<br>(35-64)    |
| <b>Kuwait</b>       | 13010<br>(11106-14871)    | 14434<br>(12440-16434)    | 1346<br>(1143-1546)    | 1503<br>(1288-1719)    | 1<br>(0-2)    | 1<br>(0-3)    | 40<br>(18-72)     | 49<br>(23-88)     | 10<br>(5-21)     | 21<br>(8-48)     |
| <b>Lebanon</b>      | 43680<br>(37419-50397)    | 26975<br>(23336-31172)    | 4084<br>(3512-4725)    | 2665<br>(2312-3053)    | 5<br>(3-7)    | 8<br>(5-11)   | 179<br>(84-334)   | 117<br>(56-213)   | 60<br>(32-88)    | 115<br>(71-161)  |
| <b>Libya</b>        | 29738<br>(25722-33958)    | 23559<br>(20307-27079)    | 3053<br>(2652-3506)    | 2506<br>(2168-2866)    | 3<br>(1-4)    | 4<br>(2-6)    | 120<br>(56-221)   | 100<br>(47-178)   | 35<br>(19-54)    | 65<br>(35-98)    |
| <b>Morocco</b>      | 181411<br>(155991-208353) | 134650<br>(114910-155045) | 19095<br>(16470-21943) | 14676<br>(12506-16999) | 19<br>(10-29) | 33<br>(20-46) | 803<br>(377-1485) | 631<br>(293-1154) | 271<br>(140-415) | 528<br>(330-722) |
| <b>Oman</b>         | 8547<br>(7338-9825)       | 9424<br>(7995-10968)      | 918<br>(784-1058)      | 1090<br>(927-1264)     | 1<br>(0-2)    | 2<br>(1-4)    | 30<br>(14-55)     | 28<br>(13-51)     | 16<br>(8-29)     | 50<br>(24-75)    |
| <b>Palestine</b>    | 13764<br>(11810-15752)    | 9586<br>(8173-11029)      | 1467<br>(1269-1691)    | 1089<br>(932-1251)     | 1<br>(0-1)    | 1<br>(1-1)    | 56<br>(26-99)     | 38<br>(18-69)     | 11<br>(7-14)     | 12<br>(10-15)    |

|                             |                              |                              |                           |                           |                    |                     |                        |                        |                        |                        |
|-----------------------------|------------------------------|------------------------------|---------------------------|---------------------------|--------------------|---------------------|------------------------|------------------------|------------------------|------------------------|
| <b>Qatar</b>                | 2784<br>(2318-3253)          | 7078<br>(5917-8348)          | 322<br>(270-377)          | 823<br>(687-969)          | 0<br>(0-0)         | 1<br>(1-1)          | 7<br>(3-12)            | 18<br>(8-32)           | 7<br>(2-10)            | 16<br>(11-23)          |
| <b>Saudi Arabia</b>         | 70476<br>(60544-81489)       | 82902<br>(70018-95796)       | 7755<br>(6579-9000)       | 9408<br>(7945-10862)      | 3<br>(2-5)         | 5<br>(4-6)          | 216<br>(99-394)        | 262<br>(119-475)       | 58<br>(35-83)          | 94<br>(70-123)         |
| <b>Sudan</b>                | 82174<br>(70404-94381)       | 75004<br>(64127-85757)       | 9041<br>(7752-10387)      | 8355<br>(7186-9598)       | 7<br>(4-11)        | 18<br>(9-28)        | 360<br>(167-662)       | 363<br>(168-658)       | 110<br>(59-165)        | 297<br>(143-479)       |
| <b>Syrian Arab Republic</b> | 67161<br>(57228-76924)       | 54610<br>(46475-63025)       | 7354<br>(6310-8458)       | 6050<br>(5126-7033)       | 3<br>(2-4)         | 3<br>(2-5)          | 266<br>(121-489)       | 236<br>(108-431)       | 41<br>(27-59)          | 59<br>(42-81)          |
| <b>Tunisia</b>              | 83450<br>(71660-95975)       | 58886<br>(50821-67257)       | 8180<br>(7074-9466)       | 6151<br>(5299-7097)       | 10<br>(5-14)       | 13<br>(8-19)        | 350<br>(162-639)       | 257<br>(121-465)       | 128<br>(68-190)        | 214<br>(130-322)       |
| <b>Turkey</b>               | 600347<br>(518274-689285)    | 391461<br>(337035-449572)    | 57022<br>(49224-65407)    | 40327<br>(34547-46470)    | 355<br>(230-764)   | 461<br>(354-585)    | 2561<br>(1207-4693)    | 1705<br>(809-3088)     | 4830<br>(3269-9282)    | 8783<br>(6703-11391)   |
| <b>United Arab Emirates</b> | 10685<br>(8961-12504)        | 27525<br>(22691-32592)       | 1277<br>(1065-1490)       | 3442<br>(2833-4124)       | 1<br>(0-1)         | 5<br>(2-9)          | 27<br>(12-50)          | 60<br>(27-110)         | 13<br>(6-26)           | 138<br>(59-277)        |
| <b>Yemen</b>                | 69790<br>(59705-79786)       | 52067<br>(44249-60442)       | 7825<br>(6679-9001)       | 5976<br>(5109-6899)       | 5<br>(2-8)         | 9<br>(5-14)         | 318<br>(148-570)       | 252<br>(119-448)       | 75<br>(43-125)         | 158<br>(85-259)        |
| <b>South Asia</b>           | 7410946<br>(6413513-8481254) | 4593518<br>(3959443-5270766) | 782190<br>(673528-896177) | 504398<br>(432483-578542) | 1205<br>(793-1736) | 1760<br>(1262-2567) | 35289<br>(16486-63675) | 22724<br>(10694-40380) | 18428<br>(11967-26820) | 31322<br>(22776-45111) |

|                                              |                                 |                              |                              |                           |                   |                     |                          |                        |                       |                        |
|----------------------------------------------|---------------------------------|------------------------------|------------------------------|---------------------------|-------------------|---------------------|--------------------------|------------------------|-----------------------|------------------------|
| <b>Bangladesh</b>                            | 558882<br>(477539-642459)       | 463822<br>(396638-536034)    | 59834<br>(51467-68744)       | 50116<br>(42778-57673)    | 118<br>(62-184)   | 219<br>(107-357)    | 2629<br>(1207-4682)      | 2410<br>(1135-4313)    | 1751<br>(933-2716)    | 3505<br>(1705-5743)    |
| <b>Bhutan</b>                                | 2507<br>(2143-2875)             | 2008<br>(1728-2297)          | 260<br>(222-299)             | 213<br>(183-245)          | 1<br>(0-1)        | 1<br>(1-2)          | 12<br>(5-21)             | 10<br>(5-18)           | 10<br>(5-17)          | 19<br>(9-32)           |
| <b>India</b>                                 | 6115005<br>(5296125-7010649)    | 3660716<br>(3155334-4199165) | 641622<br>(552055-735744)    | 401717<br>(346377-461649) | 969<br>(622-1435) | 1345<br>(974-1996)  | 29212<br>(13675-52680)   | 17998<br>(8390-32018)  | 14811<br>(9304-21897) | 24140<br>(17462-35274) |
| <b>Nepal</b>                                 | 110599<br>(94395-128140)        | 76524<br>(65267-88857)       | 12070<br>(10358-13904)       | 8476<br>(7233-9837)       | 17<br>(10-28)     | 31<br>(17-48)       | 537<br>(253-974)         | 395<br>(184-708)       | 267<br>(153-435)      | 542<br>(292-839)       |
| <b>Pakistan</b>                              | 623954<br>(535385-716232)       | 390449<br>(332403-451090)    | 68404<br>(58987-78213)       | 43876<br>(37480-50619)    | 99<br>(59-154)    | 162<br>(100-248)    | 2900<br>(1374-5226)      | 1911<br>(884-3422)     | 1589<br>(947-2565)    | 3117<br>(1882-4819)    |
| <b>East Asia</b>                             | 22054532<br>(19000634-25252302) | 7534628<br>(6442902-8658233) | 1966972<br>(1699324-2261593) | 744165<br>(638978-857112) | 949<br>(649-1405) | 1329<br>(1075-1591) | 104388<br>(47666-188892) | 30943<br>(14332-56358) | 13557<br>(9130-19926) | 23180<br>(18353-28257) |
| <b>China</b>                                 | 21315433<br>(18333833-24451721) | 7174204<br>(6129082-8248961) | 1904608<br>(1643535-2191217) | 711273<br>(609570-819828) | 917<br>(617-1363) | 1293<br>(1040-1551) | 100657<br>(45931-182052) | 29403<br>(13615-53417) | 13119<br>(8622-19352) | 22550<br>(17884-27561) |
| <b>Democratic People's Republic of Korea</b> | 321762<br>(276121-369847)       | 123126<br>(105075-142828)    | 30204<br>(26080-34581)       | 13012<br>(11045-15080)    | 14<br>(7-20)      | 15<br>(11-20)       | 1818<br>(838-3349)       | 550<br>(251-976)       | 215<br>(114-320)      | 311<br>(226-434)       |

|                                                 |                           |                               |                        |                            |              |              |                        |                       |                 |                  |
|-------------------------------------------------|---------------------------|-------------------------------|------------------------|----------------------------|--------------|--------------|------------------------|-----------------------|-----------------|------------------|
| <b>Taiwan<br/>(Province<br/>of China)</b>       | 417338<br>(370296-466077) | 237298<br>(203711-<br>271622) | 32161<br>(28394-36190) | 19880<br>(17331-<br>22506) | 19<br>(6-45) | 22<br>(7-52) | 1914<br>(909-<br>3444) | 991<br>(452-<br>1817) | 222<br>(75-539) | 320<br>(110-767) |
| <b>Oceania</b>                                  | 51682<br>(44384-58846)    | 40501<br>(34408-<br>46403)    | 5512<br>(4736-6298)    | 4382<br>(3729-<br>5082)    | 3<br>(2-5)   | 6<br>(4-9)   | 257<br>(119-462)       | 195<br>(90-349)       | 52<br>(32-85)   | 136<br>(96-220)  |
| <b>American<br/>Samoa</b>                       | 466<br>(398-533)          | 315<br>(269-362)              | 44<br>(38-51)          | 31<br>(26-36)              | 0<br>(0-0)   | 0<br>(0-0)   | 2<br>(1-4)             | 1<br>(1-3)            | 0<br>(0-0)      | 2<br>(2-3)       |
| <b>Cook<br/>Islands</b>                         | 233<br>(200-269)          | 162<br>(138-185)              | 20<br>(18-23)          | 15<br>(13-17)              | 0<br>(0-0)   | 0<br>(0-0)   | 1<br>(1-2)             | 1<br>(0-1)            | 0<br>(0-1)      | 1<br>(1-2)       |
| <b>Fiji</b>                                     | 7436<br>(6372-8574)       | 4865<br>(4125-5633)           | 747<br>(641-865)       | 510<br>(436-594)           | 1<br>(0-1)   | 0<br>(0-0)   | 38<br>(18-69)          | 23<br>(11-41)         | 11<br>(6-16)    | 8<br>(6-11)      |
| <b>Guam</b>                                     | 1629<br>(1407-1864)       | 1083<br>(921-1245)            | 139<br>(120-159)       | 99<br>(84-114)             | 0<br>(0-0)   | 0<br>(0-0)   | 9<br>(4-15)            | 5<br>(2-9)            | 2<br>(1-3)      | 6<br>(4-7)       |
| <b>Kiribati</b>                                 | 785<br>(665-901)          | 434<br>(365-504)              | 84<br>(72-97)          | 48<br>(41-56)              | 0<br>(0-0)   | 0<br>(0-0)   | 4<br>(2-8)             | 2<br>(1-4)            | 1<br>(1-2)      | 1<br>(0-1)       |
| <b>Marshall<br/>Islands</b>                     | 252<br>(214-290)          | 200<br>(171-232)              | 28<br>(24-33)          | 22<br>(19-25)              | 0<br>(0-0)   | 0<br>(0-0)   | 1<br>(1-2)             | 1<br>(0-2)            | 0<br>(0-1)      | 1<br>(1-2)       |
| <b>Micronesia<br/>(Federated<br/>States of)</b> | 572<br>(489-662)          | 379<br>(321-442)              | 61<br>(52-72)          | 42<br>(35-49)              | 0<br>(0-0)   | 0<br>(0-0)   | 3<br>(1-5)             | 2<br>(1-3)            | 1<br>(1-2)      | 3<br>(1-4)       |
| <b>Nauru</b>                                    | 34<br>(28-39)             | 21<br>(18-25)                 | 4<br>(3-4)             | 2<br>(2-3)                 | 0<br>(0-0)   | 0<br>(0-0)   | 0<br>(0-0)             | 0<br>(0-0)            | 0<br>(0-0)      | 0<br>(0-0)       |
| <b>Niue</b>                                     | 22<br>(19-25)             | 13<br>(11-15)                 | 2<br>(2-2)             | 1<br>(1-1)                 | 0<br>(0-0)   | 0<br>(0-0)   | 0<br>(0-0)             | 0<br>(0-0)            | 0<br>(0-0)      | 0<br>(0-0)       |

|                                 |                              |                              |                           |                           |                  |                  |                        |                       |                     |                       |
|---------------------------------|------------------------------|------------------------------|---------------------------|---------------------------|------------------|------------------|------------------------|-----------------------|---------------------|-----------------------|
| <b>Northern Mariana Islands</b> | 398<br>(338-459)             | 309<br>(262-360)             | 40<br>(34-47)             | 31<br>(26-37)             | 0<br>(0-0)       | 0<br>(0-0)       | 2<br>(1-3)             | 1<br>(1-2)            | 1<br>(1-2)          | 2<br>(1-2)            |
| <b>Palau</b>                    | 182<br>(155-209)             | 133<br>(113-153)             | 18<br>(16-21)             | 14<br>(12-16)             | 0<br>(0-0)       | 0<br>(0-0)       | 1<br>(0-1)             | 1<br>(0-1)            | 0<br>(0-0)          | 0<br>(0-0)            |
| <b>Papua New Guinea</b>         | 31251<br>(26781-35768)       | 26239<br>(22208-30288)       | 3440<br>(2915-3951)       | 2888<br>(2441-3347)       | 1<br>(1-3)       | 4<br>(2-7)       | 153<br>(70-272)        | 127<br>(59-230)       | 25<br>(14-50)       | 86<br>(52-157)        |
| <b>Samoa</b>                    | 1459<br>(1266-1674)          | 1020<br>(876-1171)           | 141<br>(122-162)          | 103<br>(89-120)           | 0<br>(0-0)       | 0<br>(0-0)       | 8<br>(4-14)            | 5<br>(2-9)            | 2<br>(1-3)          | 5<br>(3-7)            |
| <b>Solomon Islands</b>          | 2232<br>(1908-2581)          | 1727<br>(1469-1984)          | 252<br>(215-292)          | 193<br>(164-223)          | 0<br>(0-0)       | 0<br>(0-0)       | 10<br>(5-19)           | 8<br>(4-14)           | 3<br>(2-6)          | 8<br>(5-14)           |
| <b>Tokelau</b>                  | 12<br>(10-13)                | 9<br>(7-10)                  | 1<br>(1-1)                | 1<br>(1-1)                | 0<br>(0-0)       | 0<br>(0-0)       | 0<br>(0-0)             | 0<br>(0-0)            | 0<br>(0-0)          | 0<br>(0-0)            |
| <b>Tonga</b>                    | 818<br>(708-939)             | 502<br>(427-577)             | 76<br>(65-87)             | 50<br>(43-57)             | 0<br>(0-0)       | 0<br>(0-0)       | 5<br>(2-8)             | 3<br>(1-5)            | 1<br>(1-1)          | 3<br>(2-4)            |
| <b>Tuvalu</b>                   | 94<br>(80-108)               | 59<br>(51-68)                | 9<br>(8-11)               | 6<br>(5-7)                | 0<br>(0-0)       | 0<br>(0-0)       | 1<br>(0-1)             | 0<br>(0-1)            | 0<br>(0-0)          | 0<br>(0-0)            |
| <b>Vanuatu</b>                  | 1367<br>(1167-1568)          | 1118<br>(959-1282)           | 144<br>(125-166)          | 118<br>(101-136)          | 0<br>(0-0)       | 0<br>(0-0)       | 8<br>(4-14)            | 6<br>(3-11)           | 1<br>(1-2)          | 5<br>(3-8)            |
| <b>Southeast Asia</b>           | 5841655<br>(5044852-6642118) | 2964037<br>(2543109-3382019) | 569621<br>(493710-651067) | 306764<br>(264937-352797) | 329<br>(222-483) | 584<br>(445-741) | 29272<br>(13671-52546) | 13616<br>(6359-24476) | 4527<br>(3086-6620) | 12034<br>(9063-15336) |
| <b>Cambodia</b>                 | 107518<br>(92175-123154)     | 52454<br>(44552-60278)       | 11045<br>(9484-12768)     | 5589<br>(4788-6442)       | 5<br>(3-8)       | 8<br>(5-14)      | 572<br>(269-1020)      | 252<br>(115-442)      | 82<br>(53-131)      | 168<br>(103-272)      |

|                                         |                              |                             |                           |                          |                 |                  |                       |                     |                     |                     |
|-----------------------------------------|------------------------------|-----------------------------|---------------------------|--------------------------|-----------------|------------------|-----------------------|---------------------|---------------------|---------------------|
| <b>Indonesia</b>                        | 2259938<br>(1942978-2581921) | 1064656<br>(908044-1217201) | 226376<br>(195598-260299) | 112924<br>(97295-130198) | 115<br>(74-182) | 248<br>(144-392) | 11238<br>(5221-20124) | 4886<br>(2253-8741) | 1714<br>(1124-2696) | 5249<br>(2932-8261) |
| <b>Lao People's Democratic Republic</b> | 36160<br>(30990-41405)       | 23172<br>(19784-26730)      | 3725<br>(3205-4274)       | 2456<br>(2100-2848)      | 2<br>(1-3)      | 4<br>(3-6)       | 192<br>(89-346)       | 117<br>(54-209)     | 28<br>(17-43)       | 89<br>(55-131)      |
| <b>Malaysia</b>                         | 216635<br>(186459-248267)    | 148323<br>(126355-169761)   | 20547<br>(17763-23761)    | 14401<br>(12414-16573)   | 17<br>(9-23)    | 18<br>(13-24)    | 1029<br>(481-1881)    | 678<br>(314-1240)   | 247<br>(132-346)    | 348<br>(251-468)    |
| <b>Maldives</b>                         | 2197<br>(1882-2497)          | 1863<br>(1601-2142)         | 214<br>(184-245)          | 189<br>(163-217)         | 1<br>(1-1)      | 0<br>(0-0)       | 10<br>(4-17)          | 7<br>(3-13)         | 12<br>(8-19)        | 2<br>(1-2)          |
| <b>Mauritius</b>                        | 18615<br>(16083-21596)       | 10423<br>(8899-11991)       | 1667<br>(1432-1944)       | 1008<br>(852-1167)       | 2<br>(1-5)      | 3<br>(1-7)       | 93<br>(43-173)        | 48<br>(22-86)       | 26<br>(9-59)        | 45<br>(15-109)      |
| <b>Myanmar</b>                          | 486454<br>(416145-556477)    | 254040<br>(217425-291212)   | 48410<br>(41871-55645)    | 26464<br>(22720-30507)   | 26<br>(18-39)   | 49<br>(32-69)    | 2600<br>(1232-4756)   | 1265<br>(581-2270)  | 370<br>(258-554)    | 1017<br>(653-1429)  |
| <b>Philippines</b>                      | 744752<br>(643507-850738)    | 358329<br>(306999-409152)   | 73398<br>(63696-83726)    | 37975<br>(32666-43816)   | 36<br>(25-55)   | 71<br>(54-91)    | 3877<br>(1803-6937)   | 1672<br>(781-2984)  | 540<br>(358-806)    | 1642<br>(1233-2148) |
| <b>Seychelles</b>                       | 1007<br>(870-1152)           | 606<br>(515-694)            | 90<br>(78-103)            | 60<br>(51-70)            | 0<br>(0-0)      | 0<br>(0-0)       | 5<br>(2-9)            | 3<br>(1-5)          | 1<br>(1-2)          | 4<br>(2-6)          |
| <b>Sri Lanka</b>                        | 239590<br>(206302-274641)    | 127829<br>(109344-147198)   | 22247<br>(19125-25798)    | 12693<br>(10938-14739)   | 10<br>(6-16)    | 20<br>(14-29)    | 1169<br>(547-2139)    | 577<br>(270-1080)   | 141<br>(84-217)     | 413<br>(272-599)    |

|                                         |                            |                           |                        |                        |                 |                  |                     |                     |                    |                       |
|-----------------------------------------|----------------------------|---------------------------|------------------------|------------------------|-----------------|------------------|---------------------|---------------------|--------------------|-----------------------|
| <b>Thailand</b>                         | 832931<br>(717279-952032)  | 470477<br>(404090-538800) | 75803<br>(65267-87665) | 45329<br>(39014-52765) | 41<br>(22-57)   | 40<br>(29-53)    | 4133<br>(1932-7545) | 2188<br>(1019-4019) | 466<br>(273-645)   | 566<br>(401-763)      |
| <b>Timor-Leste</b>                      | 6536<br>(5574-7504)        | 4485<br>(3809-5227)       | 669<br>(570-775)       | 460<br>(392-532)       | 0<br>(0-1)      | 1<br>(0-1)       | 37<br>(17-66)       | 24<br>(11-43)       | 5<br>(3-8)         | 14<br>(7-23)          |
| <b>Viet Nam</b>                         | 881668<br>(756154-1007893) | 443496<br>(379005-510852) | 84683<br>(72824-96845) | 46813<br>(39795-53861) | 73<br>(44-122)  | 120<br>(82-162)  | 4279<br>(1953-7639) | 1880<br>(869-3457)  | 888<br>(552-1461)  | 2462<br>(1626-3427)   |
| <b>Central Sub-Saharan Africa</b>       | 318753<br>(273582-365585)  | 171113<br>(146234-196391) | 36105<br>(31050-41606) | 20231<br>(17334-23441) | 217<br>(30-382) | 584<br>(259-970) | 1625<br>(751-2918)  | 831<br>(387-1476)   | 3811<br>(515-6809) | 12803<br>(5505-21201) |
| <b>Angola</b>                           | 74194<br>(63334-85494)     | 40286<br>(34151-46495)    | 8276<br>(7067-9589)    | 4634<br>(3962-5366)    | 35<br>(5-70)    | 81<br>(55-114)   | 360<br>(168-674)    | 194<br>(88-343)     | 651<br>(87-1292)   | 1786<br>(1189-2501)   |
| <b>Central African Republic</b>         | 12812<br>(10900-14783)     | 6837<br>(5834-7861)       | 1523<br>(1305-1757)    | 849<br>(715-980)       | 6<br>(1-15)     | 12<br>(6-19)     | 69<br>(32-123)      | 34<br>(16-61)       | 114<br>(14-304)    | 283<br>(151-471)      |
| <b>Congo</b>                            | 15842<br>(13480-18271)     | 9794<br>(8338-11290)      | 1758<br>(1510-2024)    | 1126<br>(967-1296)     | 12<br>(2-21)    | 32<br>(20-44)    | 77<br>(36-141)      | 47<br>(21-83)       | 217<br>(28-382)    | 683<br>(399-972)      |
| <b>Democratic Republic of the Congo</b> | 205488<br>(176175-235485)  | 108693<br>(92795-125714)  | 23496<br>(20111-27143) | 13031<br>(11152-15158) | 153<br>(21-279) | 436<br>(135-799) | 1068<br>(494-1930)  | 531<br>(250-952)    | 2665<br>(350-4910) | 9575<br>(2787-17329)  |
| <b>Equatorial Guinea</b>                | 3364<br>(2887-3847)        | 1593<br>(1366-1821)       | 343<br>(295-394)       | 168<br>(145-194)       | 3<br>(0-6)      | 6<br>(3-11)      | 16<br>(7-30)        | 8<br>(4-14)         | 54<br>(6-103)      | 117<br>(64-211)       |

|                                   |                           |                           |                         |                        |                  |                    |                     |                     |                      |                        |
|-----------------------------------|---------------------------|---------------------------|-------------------------|------------------------|------------------|--------------------|---------------------|---------------------|----------------------|------------------------|
| <b>Gabon</b>                      | 7053<br>(6046-8034)       | 3910<br>(3329-4518)       | 709<br>(613-813)        | 425<br>(360-495)       | 7<br>(1-12)      | 17<br>(10-25)      | 35<br>(16-63)       | 19<br>(9-33)        | 111<br>(15-187)      | 358<br>(200-528)       |
| <b>Eastern Sub-Saharan Africa</b> | 812976<br>(699572-930706) | 536038<br>(460409-617713) | 91258<br>(78943-104520) | 61822<br>(53351-70623) | 542<br>(81-1006) | 1062<br>(724-1431) | 4097<br>(1900-7354) | 2708<br>(1266-4827) | 8837<br>(1282-16831) | 21377<br>(14598-28584) |
| <b>Burundi</b>                    | 19922<br>(17119-22975)    | 16212<br>(13825-18785)    | 2323<br>(2007-2669)     | 1932<br>(1647-2238)    | 10<br>(1-23)     | 22<br>(13-34)      | 102<br>(47-184)     | 84<br>(39-149)      | 167<br>(22-400)      | 470<br>(270-728)       |
| <b>Comoros</b>                    | 2665<br>(2267-3086)       | 1648<br>(1411-1895)       | 288<br>(245-333)        | 183<br>(159-209)       | 2<br>(0-4)       | 3<br>(2-4)         | 14<br>(7-26)        | 9<br>(4-16)         | 31<br>(4-59)         | 55<br>(35-82)          |
| <b>Djibouti</b>                   | 2648<br>(2260-3043)       | 2377<br>(2020-2759)       | 302<br>(259-345)        | 276<br>(235-320)       | 2<br>(0-3)       | 5<br>(3-7)         | 12<br>(6-22)        | 11<br>(5-20)        | 29<br>(4-53)         | 100<br>(56-160)        |
| <b>Eritrea</b>                    | 13156<br>(11226-15146)    | 7098<br>(6029-8260)       | 1525<br>(1301-1756)     | 864<br>(735-1010)      | 9<br>(1-18)      | 10<br>(6-16)       | 66<br>(31-118)      | 32<br>(15-57)       | 161<br>(20-338)      | 238<br>(151-383)       |
| <b>Ethiopia</b>                   | 166503<br>(142732-191459) | 133922<br>(115754-153506) | 18883<br>(16256-21667)  | 15176<br>(13087-17368) | 112<br>(16-203)  | 292<br>(155-437)   | 834<br>(382-1492)   | 704<br>(328-1280)   | 1795<br>(264-3296)   | 5367<br>(2788-8042)    |
| <b>Kenya</b>                      | 121220<br>(104593-138943) | 70154<br>(60015-80824)    | 13386<br>(11575-15333)  | 8116<br>(6985-9309)    | 83<br>(13-131)   | 108<br>(79-147)    | 596<br>(275-1068)   | 334<br>(155-596)    | 1314<br>(195-2060)   | 2234<br>(1631-3087)    |
| <b>Madagascar</b>                 | 49985<br>(42621-57048)    | 35328<br>(30136-41271)    | 5834<br>(5020-6764)     | 4172<br>(3528-4881)    | 38<br>(5-81)     | 75<br>(46-117)     | 243<br>(114-428)    | 174<br>(81-308)     | 741<br>(96-1620)     | 1704<br>(1033-2680)    |

|                                    |                           |                         |                        |                       |                  |                  |                   |                  |                    |                     |
|------------------------------------|---------------------------|-------------------------|------------------------|-----------------------|------------------|------------------|-------------------|------------------|--------------------|---------------------|
| <b>Malawi</b>                      | 42230<br>(36358-48473)    | 24127<br>(20584-27916)  | 4710<br>(4007-5395)    | 2843<br>(2433-3267)   | 22<br>(3-41)     | 38<br>(23-58)    | 225<br>(105-408)  | 122<br>(57-221)  | 335<br>(49-634)    | 785<br>(484-1209)   |
| <b>Mozambique</b>                  | 64445<br>(55076-74703)    | 36737<br>(31446-42366)  | 7253<br>(6259-8331)    | 4351<br>(3697-5040)   | 39<br>(5-75)     | 89<br>(45-130)   | 335<br>(154-597)  | 186<br>(87-333)  | 612<br>(83-1207)   | 1927<br>(943-2839)  |
| <b>Rwanda</b>                      | 35115<br>(29956-40272)    | 18629<br>(15918-21479)  | 3945<br>(3354-4564)    | 2172<br>(1835-2518)   | 20<br>(3-44)     | 26<br>(14-47)    | 177<br>(80-329)   | 92<br>(44-165)   | 338<br>(45-750)    | 549<br>(307-961)    |
| <b>Somalia</b>                     | 34634<br>(29551-40262)    | 18852<br>(15883-21741)  | 4202<br>(3592-4866)    | 2384<br>(2023-2751)   | 13<br>(2-36)     | 17<br>(9-31)     | 188<br>(87-336)   | 96<br>(44-175)   | 257<br>(33-698)    | 410<br>(202-725)    |
| <b>South Sudan</b>                 | 17730<br>(15375-20064)    | 15132<br>(12846-17449)  | 1922<br>(1665-2209)    | 1631<br>(1390-1884)   | 10<br>(1-17)     | 27<br>(14-43)    | 87<br>(41-158)    | 81<br>(38-143)   | 162<br>(23-296)    | 534<br>(268-873)    |
| <b>Uganda</b>                      | 73753<br>(63509-84524)    | 42111<br>(36002-48442)  | 8224<br>(7058-9484)    | 4890<br>(4212-5652)   | 45<br>(5-93)     | 88<br>(41-137)   | 372<br>(176-679)  | 205<br>(94-359)  | 708<br>(82-1474)   | 1827<br>(866-2855)  |
| <b>United Republic of Tanzania</b> | 134699<br>(116245-154883) | 90407<br>(77567-104172) | 14650<br>(12672-16785) | 10161<br>(8747-11727) | 107<br>(15-202)  | 206<br>(97-339)  | 678<br>(315-1209) | 466<br>(217-826) | 1674<br>(231-3191) | 4013<br>(1897-6616) |
| <b>Zambia</b>                      | 33621<br>(28731-38435)    | 22877<br>(19684-26205)  | 3739<br>(3202-4260)    | 2622<br>(2267-3013)   | 30<br>(4-58)     | 54<br>(32-87)    | 165<br>(77-296)   | 109<br>(50-197)  | 506<br>(62-944)    | 1145<br>(669-1858)  |
| <b>Southern Sub-</b>               | 483373<br>(419193-550842) | 192677                  | 48747<br>(42032-56102) | 21186                 | 371<br>(223-482) | 542<br>(462-618) | 2409              | 925              | 6303               | 12399               |

|                                   |                           |                           |                         |                        |                  |                  |                     |                     |                     |                       |
|-----------------------------------|---------------------------|---------------------------|-------------------------|------------------------|------------------|------------------|---------------------|---------------------|---------------------|-----------------------|
| <b>Saharan Africa</b>             |                           | (164888-221087)           |                         | (18249-24441)          |                  |                  | (1125-4329)         | (423-1668)          | (3632-8040)         | (10362-14399)         |
| <b>Botswana</b>                   | 10328<br>(8868-11876)     | 5155<br>(4384-5963)       | 1077<br>(922-1248)      | 577<br>(489-668)       | 4<br>(1-7)       | 9<br>(6-13)      | 46<br>(22-84)       | 22<br>(10-40)       | 85<br>(20-146)      | 242<br>(158-357)      |
| <b>Eswatini</b>                   | 4901<br>(4163-5704)       | 2072<br>(1765-2396)       | 515<br>(438-595)        | 236<br>(201-275)       | 2<br>(0-3)       | 3<br>(2-5)       | 25<br>(12-46)       | 10<br>(5-18)        | 31<br>(7-55)        | 79<br>(53-123)        |
| <b>Lesotho</b>                    | 10306<br>(8779-11872)     | 4493<br>(3822-5161)       | 1121<br>(960-1305)      | 526<br>(449-609)       | 4<br>(1-7)       | 5<br>(3-8)       | 55<br>(26-102)      | 23<br>(10-40)       | 78<br>(18-134)      | 126<br>(75-199)       |
| <b>Namibia</b>                    | 10745<br>(9271-12331)     | 5126<br>(4355-5908)       | 1084<br>(938-1255)      | 555<br>(479-637)       | 5<br>(1-9)       | 10<br>(7-15)     | 53<br>(25-97)       | 25<br>(11-44)       | 86<br>(20-153)      | 235<br>(155-339)      |
| <b>South Africa</b>               | 394119<br>(342425-449088) | 150454<br>(128826-172825) | 39016<br>(33660-44886)  | 16328<br>(14049-18818) | 353<br>(218-470) | 511<br>(431-587) | 1954<br>(907-3503)  | 718<br>(330-1290)   | 5984<br>(3557-7813) | 11665<br>(9590-13574) |
| <b>Zimbabwe</b>                   | 52973<br>(45087-61200)    | 25376<br>(21591-29492)    | 5935<br>(5082-6911)     | 2964<br>(2525-3425)    | 2<br>(1-4)       | 2<br>(2-3)       | 275<br>(129-495)    | 128<br>(59-227)     | 39<br>(17-61)       | 52<br>(39-68)         |
| <b>Western Sub-Saharan Africa</b> | 867304<br>(747591-993585) | 649449<br>(558214-744075) | 96994<br>(83795-111290) | 73056<br>(63015-83586) | 329<br>(115-487) | 123<br>(97-154)  | 4173<br>(1957-7498) | 3311<br>(1535-5945) | 6512<br>(2258-9729) | 2093<br>(1634-2642)   |
| <b>Benin</b>                      | 24764<br>(21309-28439)    | 17312<br>(14894-19968)    | 2739<br>(2358-3155)     | 1975<br>(1693-2281)    | 9<br>(3-14)      | 3<br>(2-4)       | 127<br>(60-231)     | 89<br>(41-161)      | 166<br>(56-284)     | 54<br>(37-79)         |
| <b>Burkina Faso</b>               | 42861<br>(36951-49334)    | 28560<br>(24448-33092)    | 4873<br>(4196-5619)     | 3293<br>(2839-3780)    | 24<br>(8-45)     | 6<br>(4-10)      | 217<br>(101-391)    | 148<br>(70-266)     | 501<br>(162-958)    | 116<br>(77-176)       |

|                      |                        |                        |                      |                     |              |              |                  |                  |                   |                  |
|----------------------|------------------------|------------------------|----------------------|---------------------|--------------|--------------|------------------|------------------|-------------------|------------------|
| <b>Cabo Verde</b>    | 2601<br>(2261-2975)    | 1518<br>(1306-1740)    | 251<br>(218-288)     | 158<br>(137-182)    | 2<br>(1-3)   | 0<br>(0-0)   | 13<br>(6-23)     | 7<br>(3-13)      | 32<br>(15-47)     | 4<br>(3-5)       |
| <b>Cameroon</b>      | 54252<br>(46337-62157) | 40931<br>(34931-47069) | 6062<br>(5216-7022)  | 4697<br>(4013-5420) | 27<br>(9-49) | 11<br>(7-17) | 265<br>(125-481) | 202<br>(93-367)  | 543<br>(166-1018) | 195<br>(117-318) |
| <b>Chad</b>          | 21629<br>(18716-24851) | 21081<br>(18015-24482) | 2457<br>(2119-2820)  | 2394<br>(2065-2763) | 8<br>(3-14)  | 4<br>(2-6)   | 112<br>(52-200)  | 117<br>(55-215)  | 164<br>(52-295)   | 78<br>(43-114)   |
| <b>Côte d'Ivoire</b> | 47273<br>(40345-54770) | 42178<br>(35914-49007) | 5329<br>(4557-6155)  | 4889<br>(4220-5678) | 15<br>(5-27) | 7<br>(5-10)  | 231<br>(109-414) | 206<br>(97-363)  | 304<br>(99-574)   | 133<br>(88-189)  |
| <b>Gambia</b>        | 5018<br>(4296-5769)    | 3760<br>(3209-4319)    | 545<br>(469-621)     | 424<br>(365-486)    | 2<br>(1-3)   | 1<br>(1-1)   | 26<br>(12-47)    | 20<br>(9-36)     | 37<br>(11-65)     | 14<br>(9-19)     |
| <b>Ghana</b>         | 83778<br>(72439-96484) | 52522<br>(44726-60685) | 9225<br>(8032-10649) | 5966<br>(5095-6916) | 9<br>(6-16)  | 5<br>(4-7)   | 407<br>(190-743) | 256<br>(117-466) | 168<br>(103-328)  | 95<br>(68-128)   |
| <b>Guinea</b>        | 23415<br>(20094-26909) | 19419<br>(16643-22374) | 2602<br>(2238-2983)  | 2179<br>(1885-2503) | 10<br>(3-19) | 4<br>(3-6)   | 126<br>(60-225)  | 111<br>(52-198)  | 199<br>(61-382)   | 68<br>(45-100)   |
| <b>Guinea-Bissau</b> | 3452<br>(2965-3988)    | 2291<br>(1954-2637)    | 398<br>(343-457)     | 272<br>(233-313)    | 1<br>(0-2)   | 0<br>(0-1)   | 18<br>(8-32)     | 12<br>(5-21)     | 27<br>(9-55)      | 8<br>(5-12)      |
| <b>Liberia</b>       | 9535<br>(8142-10913)   | 8284<br>(7119-9493)    | 1095<br>(943-1248)   | 965<br>(823-1115)   | 3<br>(1-6)   | 1<br>(1-2)   | 46<br>(22-83)    | 40<br>(19-72)    | 62<br>(21-121)    | 25<br>(15-36)    |
| <b>Mali</b>          | 35991<br>(31097-41047) | 31852                  | 4095<br>(3522-4723)  | 3602                | 14<br>(5-27) | 6<br>(4-9)   | 184<br>(85-327)  | 171<br>(79-309)  | 293<br>(97-545)   | 96<br>(62-139)   |

|                              |                           |                           |                        |                        |                 |               |                    |                    |                     |                   |
|------------------------------|---------------------------|---------------------------|------------------------|------------------------|-----------------|---------------|--------------------|--------------------|---------------------|-------------------|
|                              |                           | (27367-36776)             |                        | (3067-4134)            |                 |               |                    |                    |                     |                   |
| <b>Mauritania</b>            | 9702<br>(8365-11143)      | 8109<br>(6997-9291)       | 1061<br>(913-1235)     | 874<br>(755-1010)      | 5<br>(1-8)      | 2<br>(1-3)    | 48<br>(23-87)      | 43<br>(20-77)      | 92<br>(27-166)      | 27<br>(17-43)     |
| <b>Niger</b>                 | 33122<br>(28264-38136)    | 25666<br>(21869-29515)    | 3875<br>(3335-4465)    | 2986<br>(2542-3472)    | 11<br>(4-22)    | 4<br>(2-6)    | 167<br>(79-307)    | 138<br>(64-248)    | 238<br>(77-489)     | 75<br>(37-114)    |
| <b>Nigeria</b>               | 395194<br>(340034-453253) | 291684<br>(250937-332978) | 44070<br>(38017-50698) | 32211<br>(27925-36881) | 160<br>(52-269) | 56<br>(36-83) | 1804<br>(849-3248) | 1467<br>(685-2627) | 3135<br>(1011-5336) | 915<br>(572-1373) |
| <b>Sao Tome and Principe</b> | 522<br>(448-602)          | 393<br>(337-452)          | 57<br>(49-66)          | 44<br>(38-50)          | 0<br>(0-0)      | 0<br>(0-0)    | 2<br>(1-4)         | 2<br>(1-3)         | 4<br>(2-8)          | 2<br>(1-2)        |
| <b>Senegal</b>               | 37225<br>(32018-42930)    | 27932<br>(23968-32205)    | 4085<br>(3495-4685)    | 3106<br>(2688-3588)    | 15<br>(5-25)    | 7<br>(4-9)    | 192<br>(89-349)    | 150<br>(69-272)    | 296<br>(98-520)     | 109<br>(72-148)   |
| <b>Sierra Leone</b>          | 17795<br>(15359-20553)    | 14543<br>(12430-16818)    | 1985<br>(1722-2282)    | 1659<br>(1437-1905)    | 5<br>(2-10)     | 2<br>(2-3)    | 92<br>(42-167)     | 77<br>(37-138)     | 99<br>(33-192)      | 39<br>(26-59)     |
| <b>Togo</b>                  | 19162<br>(16361-22190)    | 11405<br>(9682-13140)     | 2187<br>(1875-2542)    | 1360<br>(1164-1563)    | 7<br>(3-13)     | 2<br>(1-3)    | 95<br>(45-174)     | 53<br>(24-96)      | 152<br>(52-273)     | 41<br>(27-59)     |

**Data in parentheses are 95% uncertainty intervals.**

**SDI, socio-demographic index; YLDs, years lived with disability; YLLs, years of life lost.**
