# Supplementary material for: Burden of Peripheral Artery Disease and Its Attributable Risk Factors in 204 Countries and Territories From 1990 to 2019
Source: PubMed Central journal article supplement (PMC9039520; doi:10.3389/fcvm.2022.868370), 2022-04-12
Supplement: Table_3.pdf [file Table_3.pdf]

**Table S3. Age-standardized prevalence, incidence, death, YLD, and YLL rates of peripheral artery disease for both sexes in 2019, and their percentage changes from 1990 to 2019, by country and territory**

|                        | Prevalence                               |                                             | Incidence                                |                                             | Deaths                                   |                                             | YLDs                                     |                                            | YLLs                                     |                                             |
|------------------------|------------------------------------------|---------------------------------------------|------------------------------------------|---------------------------------------------|------------------------------------------|---------------------------------------------|------------------------------------------|--------------------------------------------|------------------------------------------|---------------------------------------------|
|                        | Age-standardized rate per 100 000 people | Percentage change in age-standardized rates | Age-standardized rate per 100 000 people | Percentage change in age-standardized rates | Age-standardized rate per 100 000 people | Percentage change in age-standardized rates | Age-standardized rate per 100 000 people | Percentage change in age-standardized rate | Age-standardized rate per 100 000 people | Percentage change in age-standardized rates |
| <b>Global</b>          | 1401.8<br>(1228.5-1589.4)                | -21.7%<br>(-22.8%--20.5%)                   | 127.1<br>(111.3-145.4)                   | -18.9%<br>(-19.8%--18.0%)                   | 1.0<br>(0.6-1.7)                         | -2.5%<br>(-21.9%-9.8%)                      | 6.3<br>(3.0-11.3)                        | -26.5%<br>(-27.7%--25.2%)                  | 13.3<br>(7.7-22.6)                       | -4.2%<br>(-22.3%-8.8%)                      |
| <b>Low SDI</b>         | 938.6<br>(815.0-1074.6)                  | 0.5%<br>(-0.4%-1.5%)                        | 94.1<br>(81.5-107.4)                     | -2.9%<br>(-3.8%--1.9%)                      | 0.7<br>(0.4-1.0)                         | 27.0%<br>(-2.4%-66.4%)                      | 5.3<br>(2.5-9.5)                         | -7.3%<br>(-9.5%--4.4%)                     | 11.5<br>(6.5-15.6)                       | 20.9%<br>(-7.7%-58.0%)                      |
| <b>Low-middle SDI</b>  | 1042.2<br>(905.4-1190.1)                 | -1.1%<br>(-2.2%--0.1%)                      | 103.2<br>(89.5-118.2)                    | -2.1%<br>(-3.0%--1.1%)                      | 0.4<br>(0.3-0.5)                         | 55.4%<br>(21.0%-82.4%)                      | 5.5<br>(2.6-9.9)                         | -12.2%<br>(-14.5%--9.1%)                   | 5.2<br>(4.0-6.6)                         | 53.5%<br>(19.3%-81.5%)                      |
| <b>Middle SDI</b>      | 1264.8<br>(1098.3-1446.0)                | 1.1%<br>(0.1%-2.0%)                         | 114.7<br>(99.6-131.5)                    | -3.4%<br>(-4.3%--2.4%)                      | 0.4<br>(0.3-0.5)                         | 29.3%<br>(4.3%-49.8%)                       | 6.3<br>(2.9-11.3)                        | -13.9%<br>(-16.9%--10.0%)                  | 4.9<br>(3.8-6.8)                         | 26.5%<br>(3.1%-46.9%)                       |
| <b>High-middle SDI</b> | 1506.1<br>(1314.6-1711.8)                | -15.4%<br>(-16.4%--14.2%)                   | 133.6<br>(116.2-153.1)                   | -15.0%<br>(-16.0%--14.1%)                   | 1.4<br>(0.7-2.4)                         | -5.3%<br>(-25.2%-11.4%)                     | 6.7<br>(3.1-12.0)                        | -23.9%<br>(-25.4%--22.3%)                  | 19.0<br>(10.0-34.7)                      | -8.4%<br>(-30.2%-8.4%)                      |
| <b>High SDI</b>        | 1794.0<br>(1585.1-2006.1)                | -34.0%<br>(-35.8%--32.0%)                   | 157.7<br>(139.5-178.5)                   | -32.1%<br>(-33.9%--30.2%)                   | 1.5<br>(0.7-2.8)                         | 7.3%<br>(-17.9%-22.0%)                      | 6.7<br>(3.1-12.1)                        | -38.1%<br>(-40.0%--36.1%)                  | 20.6<br>(10.2-38.4)                      | 7.5%<br>(-16.7%-21.1%)                      |

|                     |                           |                          |                        |                         |                  |                          |                   |                          |                   |                          |
|---------------------|---------------------------|--------------------------|------------------------|-------------------------|------------------|--------------------------|-------------------|--------------------------|-------------------|--------------------------|
| <b>Central Asia</b> | 1218.1<br>(1060.0-1392.9) | 0.8%<br>(-1.1%-2.8%)     | 118.2<br>(102.5-135.6) | -0.6%<br>(-2.5%-1.4%)   | 0.2<br>(0.1-0.3) | 71.8%<br>(28.2%-116.7%)  | 5.8<br>(2.8-10.5) | -6.9%<br>(-9.9%--3.2%)   | 3.0<br>(1.5-5.4)  | 61.8%<br>(19.3%-94.9%)   |
| <b>Armenia</b>      | 1396.8<br>(1207.7-1597.0) | -3.3%<br>(-7.3%-1.4%)    | 134.3<br>(116.0-154.0) | -4.1%<br>(-8.0%-0.6%)   | 0.3<br>(0.1-0.5) | 17.2%<br>(-56.0%-119.1%) | 6.3<br>(3.0-11.4) | -13.4%<br>(-20.4%--6.7%) | 4.5<br>(2.1-8.3)  | 14.1%<br>(-62.6%-105.3%) |
| <b>Azerbaijan</b>   | 1256.5<br>(1093.1-1440.1) | -2.6%<br>(-6.5%-1.8%)    | 121.4<br>(105.3-139.3) | -3.0%<br>(-7.2%-1.5%)   | 0.1<br>(0.1-0.1) | 76.2%<br>(13.1%-222.9%)  | 6.1<br>(2.9-11.0) | -11.5%<br>(-18.2%--4.3%) | 1.2<br>(0.9-1.5)  | 65.9%<br>(13.5%-161.0%)  |
| <b>Georgia</b>      | 1368.5<br>(1182.4-1573.4) | 8.2%<br>(3.7%-13.2%)     | 131.9<br>(114.0-152.1) | 8.6%<br>(4.0%-13.5%)    | 0.2<br>(0.1-0.4) | 62.7%<br>(8.2%-348.0%)   | 6.4<br>(3.0-11.7) | 3.8%<br>(-3.8%-12.3%)    | 2.9<br>(1.2-6.2)  | 67.7%<br>(11.6%-423.0%)  |
| <b>Kazakhstan</b>   | 1246.2<br>(1080.1-1430.8) | -4.4%<br>(-8.5%-0.3%)    | 118.4<br>(102.5-136.8) | -5.6%<br>(-9.8%--1.0%)  | 0.2<br>(0.1-0.3) | 64.7%<br>(19.8%-118.5%)  | 5.7<br>(2.7-10.4) | -13.7%<br>(-21.1%--5.1%) | 2.7<br>(1.3-5.0)  | 58.0%<br>(13.6%-105.0%)  |
| <b>Kyrgyzstan</b>   | 1086.9<br>(940.4-1250.5)  | -1.9%<br>(-6.2%-2.5%)    | 111.1<br>(96.1-128.0)  | -0.5%<br>(-4.7%-4.0%)   | 0.5<br>(0.2-1.1) | 55.5%<br>(1.2%-93.2%)    | 5.3<br>(2.5-9.7)  | -9.5%<br>(-16.1%--2.2%)  | 8.2<br>(3.8-16.5) | 38.6%<br>(-14.6%-77.3%)  |
| <b>Mongolia</b>     | 1169.7<br>(1015.1-1339.9) | -1.7%<br>(-6.3%-2.6%)    | 116.0<br>(100.6-133.3) | -3.4%<br>(-7.8%-1.1%)   | 0.1<br>(0.1-0.2) | 33.4%<br>(0.4%-86.1%)    | 6.0<br>(2.8-10.9) | -12.4%<br>(-19.8%--4.7%) | 1.3<br>(1.0-1.9)  | 23.2%<br>(-7.8%-67.4%)   |
| <b>Tajikistan</b>   | 1122.6<br>(973.1-1291.3)  | -11.4%<br>(-16.0%--6.8%) | 114.9<br>(99.3-131.8)  | -9.2%<br>(-13.7%--4.1%) | 0.1<br>(0.1-0.1) | 42.2%<br>(0.1%-153.0%)   | 5.8<br>(2.7-10.6) | -16.3%<br>(-23.3%--9.0%) | 1.3<br>(0.9-1.7)  | 45.0%<br>(7.3%-121.9%)   |
| <b>Turkmenistan</b> | 1186.9                    | -1.5%<br>(-5.6%-3.1%)    | 114.4<br>(98.6-131.0)  | -3.6%<br>(-7.6%-1.1%)   | 0.2<br>(0.1-0.5) | 78.8%                    | 5.8<br>(2.8-10.6) | -9.9%                    | 4.2<br>(1.8-8.0)  | 84.9%                    |

|                               |                           |                           |                        |                           |                   |                          |                   |                           |                      |                          |
|-------------------------------|---------------------------|---------------------------|------------------------|---------------------------|-------------------|--------------------------|-------------------|---------------------------|----------------------|--------------------------|
|                               | (1027.4-1345.8)           |                           |                        |                           |                   | (18.6%-136.2%)           |                   | (-16.9%--2.0%)            |                      | (22.7%-148.3%)           |
| <b>Uzbekistan</b>             | 1117.1<br>(961.3-1277.5)  | 11.8%<br>(6.7%-17.0%)     | 112.4<br>(97.2-128.9)  | 9.6%<br>(4.7%-14.6%)      | 0.2<br>(0.1-0.3)  | 139.5%<br>(41.1%-386.8%) | 5.4<br>(2.5-9.8)  | 3.5%<br>(-5.8%-12.2%)     | 2.9<br>(1.3-5.5)     | 135.0%<br>(30.8%-326.5%) |
| <b>Central Europe</b>         | 1313.0<br>(1140.8-1498.9) | -10.5%<br>(-11.6%--9.5%)  | 124.1<br>(107.3-142.0) | -10.7%<br>(-11.7%--9.7%)  | 1.8<br>(0.9-3.3)  | 25.5%<br>(-15.0%-73.7%)  | 5.6<br>(2.7-10.2) | -20.5%<br>(-22.1%--18.7%) | 27.3<br>(13.2-51.5)  | 20.5%<br>(-16.2%-58.1%)  |
| <b>Albania</b>                | 1224.8<br>(1058.1-1399.1) | -2.9%<br>(-6.7%-1.3%)     | 117.5<br>(101.5-134.0) | -4.1%<br>(-8.1%-0.2%)     | 0.2<br>(0.1-0.3)  | 77.6%<br>(20.9%-153.9%)  | 5.3<br>(2.5-9.6)  | -16.5%<br>(-22.7%--9.8%)  | 2.9<br>(2.1-4.0)     | 79.4%<br>(20.6%-160.2%)  |
| <b>Bosnia and Herzegovina</b> | 1502.5<br>(1297.3-1713.8) | 10.3%<br>(5.3%-15.6%)     | 143.8<br>(124.0-164.6) | 5.7%<br>(1.2%-10.4%)      | 0.4<br>(0.3-0.6)  | 80.0%<br>(32.2%-150.7%)  | 6.6<br>(3.2-12.2) | -2.8%<br>(-10.4%-4.9%)    | 6.5<br>(4.9-8.3)     | 72.2%<br>(26.4%-141.2%)  |
| <b>Bulgaria</b>               | 1303.4<br>(1124.4-1492.7) | -4.4%<br>(-8.3%--0.4%)    | 125.3<br>(108.0-144.1) | -5.2%<br>(-9.1%--1.2%)    | 0.6<br>(0.3-1.2)  | 18.7%<br>(-13.5%-73.4%)  | 5.8<br>(2.7-10.5) | -10.3%<br>(-16.9%--3.8%)  | 9.6<br>(4.3-19.3)    | 15.0%<br>(-17.2%-68.0%)  |
| <b>Croatia</b>                | 1258.3<br>(1082.5-1439.8) | -18.9%<br>(-22.3%--15.1%) | 119.0<br>(102.8-136.6) | -17.2%<br>(-21.1%--13.3%) | 2.3<br>(1.0-4.3)  | 8.1%<br>(-23.2%-46.7%)   | 5.0<br>(2.4-9.3)  | -26.2%<br>(-32.3%--20.0%) | 34.3<br>(14.6-68.7)  | 5.0%<br>(-28.0%-46.9%)   |
| <b>Czechia</b>                | 1346.7<br>(1162.5-1542.5) | -7.8%<br>(-11.6%--4.0%)   | 125.0<br>(107.8-143.9) | -7.9%<br>(-11.6%--3.9%)   | 2.0<br>(1.0-4.1)  | 8.1%<br>(-31.1%-56.7%)   | 5.4<br>(2.6-9.9)  | -17.5%<br>(-23.6%--10.9%) | 31.5<br>(14.7-65.0)  | 7.2%<br>(-34.1%-55.9%)   |
| <b>Hungary</b>                | 1421.9                    | -11.4%                    | 133.3<br>(116.1-153.1) | -11.4%                    | 4.9<br>(1.9-10.4) | 5.6%                     | 5.9<br>(2.8-10.8) | -19.7%                    | 78.5<br>(32.9-169.5) | 4.8%                     |

|                        |                           |                           |                        |                           |                  |                           |                   |                           |                      |                           |
|------------------------|---------------------------|---------------------------|------------------------|---------------------------|------------------|---------------------------|-------------------|---------------------------|----------------------|---------------------------|
|                        | (1229.0-1629.5)           | (-15.2%--7.4%)            |                        | (-15.2%--7.4%)            |                  | (-59.8%--45.9%)           |                   | (-25.3%--13.3%)           |                      | (-60.1%--47.1%)           |
| <b>Montenegro</b>      | 1539.3<br>(1331.9-1759.3) | -1.9%<br>(-5.9%-2.5%)     | 145.1<br>(125.3-166.3) | -1.3%<br>(-5.4%-2.9%)     | 0.3<br>(0.2-0.4) | 24.4%<br>(-7.6%-71.6%)    | 6.5<br>(3.2-12.0) | -8.7%<br>(-14.4%--1.6%)   | 4.5<br>(3.6-5.8)     | 19.3%<br>(-11.6%-60.4%)   |
| <b>North Macedonia</b> | 1362.2<br>(1182.2-1557.0) | -2.9%<br>(-6.8%-1.1%)     | 131.9<br>(114.2-151.4) | -3.1%<br>(-7.3%-1.3%)     | 0.3<br>(0.2-0.4) | 4.4%<br>(-24.6%-50.7%)    | 5.9<br>(2.8-11.0) | -14.3%<br>(-20.6%--7.6%)  | 4.2<br>(3.1-5.4)     | 2.1%<br>(-26.3%-43.8%)    |
| <b>Poland</b>          | 1324.8<br>(1151.1-1518.8) | -17.6%<br>(-18.8%--16.4%) | 123.9<br>(107.5-142.0) | -17.6%<br>(-18.8%--16.4%) | 1.5<br>(0.5-3.5) | 69.4%<br>(-21.3%-1810.1%) | 5.7<br>(2.7-10.3) | -27.7%<br>(-29.7%--25.2%) | 22.3<br>(8.2-51.2)   | 53.1%<br>(-24.1%-1677.4%) |
| <b>Romania</b>         | 1212.8<br>(1045.8-1384.9) | -6.1%<br>(-10.0%--1.9%)   | 116.4<br>(100.8-133.3) | -7.3%<br>(-11.6%--3.1%)   | 1.9<br>(0.9-3.8) | 23.4%<br>(-12.5%-56.8%)   | 5.3<br>(2.5-9.5)  | -16.9%<br>(-23.0%--10.5%) | 31.9<br>(13.6-63.4)  | 25.0%<br>(-11.3%-61.9%)   |
| <b>Serbia</b>          | 1377.6<br>(1193.5-1578.5) | 2.9%<br>(-1.4%-7.3%)      | 133.2<br>(116.1-153.2) | 2.2%<br>(-2.3%-6.5%)      | 0.9<br>(0.6-1.2) | 201.2%<br>(65.5%-348.3%)  | 5.9<br>(2.8-10.8) | -9.6%<br>(-16.2%--2.6%)   | 13.5<br>(9.5-17.7)   | 171.8%<br>(58.3%-297.2%)  |
| <b>Slovakia</b>        | 1184.6<br>(1017.6-1348.1) | -17.9%<br>(-21.7%--13.7%) | 112.0<br>(96.5-127.9)  | -18.1%<br>(-21.7%--14.3%) | 1.0<br>(0.6-1.4) | 292.8%<br>(95.3%-478.3%)  | 4.9<br>(2.3-9.0)  | -25.8%<br>(-31.4%--19.4%) | 16.2<br>(10.3-21.8)  | 269.9%<br>(106.3%-434.6%) |
| <b>Slovenia</b>        | 1228.8<br>(1071.3-1397.5) | -11.7%<br>(-15.7%--7.9%)  | 114.5<br>(99.6-132.3)  | -11.2%<br>(-15.0%--7.2%)  | 0.7<br>(0.1-1.5) | -36.6%<br>(-97.6%-64.9%)  | 4.8<br>(2.4-8.8)  | -20.6%<br>(-26.1%--14.8%) | 11.2<br>(1.1-24.5)   | -30.9%<br>(-97.8%-68.0%)  |
| <b>Eastern Europe</b>  | 1690.4<br>(1467.3-1936.0) | -1.9%<br>(-3.3%--0.5%)    | 153.7<br>(133.6-175.5) | -1.9%<br>(-3.3%--0.6%)    | 3.5<br>(1.7-6.7) | 31.6%<br>(-7.4%-63.5%)    | 7.5<br>(3.6-13.7) | -10.4%<br>(-12.7%--7.7%)  | 56.1<br>(26.2-109.4) | 33.1%<br>(-9.7%-67.0%)    |

|                            |                           |                           |                        |                           |                  |                          |                   |                           |                      |                          |
|----------------------------|---------------------------|---------------------------|------------------------|---------------------------|------------------|--------------------------|-------------------|---------------------------|----------------------|--------------------------|
| <b>Belarus</b>             | 1463.7<br>(1262.5-1672.9) | -1.5%<br>(-6.2%-3.2%)     | 138.8<br>(120.5-159.4) | -3.5%<br>(-8.0%-0.8%)     | 1.1<br>(0.4-2.3) | 69.9%<br>(13.5%-131.7%)  | 6.2<br>(2.9-11.5) | -12.0%<br>(-19.7%--4.0%)  | 16.4<br>(6.0-36.9)   | 69.6%<br>(13.3%-130.0%)  |
| <b>Estonia</b>             | 1489.9<br>(1288.7-1705.7) | -4.0%<br>(-8.6%-0.7%)     | 135.9<br>(117.5-155.8) | -6.1%<br>(-10.3%--1.5%)   | 0.2<br>(0.1-0.4) | 92.9%<br>(-1.6%-535.3%)  | 6.2<br>(3.0-11.4) | -15.4%<br>(-22.4%--7.8%)  | 3.2<br>(1.2-6.1)     | 79.6%<br>(-2.3%-500.3%)  |
| <b>Latvia</b>              | 1455.4<br>(1251.9-1667.5) | 7.6%<br>(2.9%-12.9%)      | 134.5<br>(116.2-154.9) | 4.7%<br>(-0.1%-9.9%)      | 0.6<br>(0.2-2.1) | 161.3%<br>(9.8%-2368.9%) | 6.3<br>(2.9-11.3) | -1.8%<br>(-9.6%-6.6%)     | 9.2<br>(2.9-30.7)    | 145.7%<br>(7.0%-2415.9%) |
| <b>Lithuania</b>           | 1407.2<br>(1207.7-1621.3) | -6.2%<br>(-10.5%--1.8%)   | 129.5<br>(111.5-149.5) | -8.1%<br>(-12.4%--3.8%)   | 1.3<br>(0.6-2.4) | 66.7%<br>(10.6%-448.5%)  | 6.1<br>(2.9-11.3) | -11.9%<br>(-18.4%--4.4%)  | 20.7<br>(8.5-39.3)   | 64.4%<br>(7.2%-468.9%)   |
| <b>Republic of Moldova</b> | 1389.8<br>(1203.0-1600.3) | 5.9%<br>(1.3%-11.2%)      | 137.8<br>(118.5-158.4) | 6.0%<br>(1.3%-11.1%)      | 0.6<br>(0.2-1.3) | 84.3%<br>(-7.6%-1403.3%) | 6.3<br>(3.0-11.7) | -3.1%<br>(-10.7%-5.4%)    | 9.3<br>(3.7-24.0)    | 85.2%<br>(-4.4%-1868.9%) |
| <b>Russian Federation</b>  | 1725.6<br>(1496.6-1973.1) | -1.8%<br>(-2.6%--0.9%)    | 154.9<br>(134.0-177.4) | -1.9%<br>(-2.8%--1.1%)    | 3.8<br>(1.9-7.4) | 31.4%<br>(-21.3%-76.1%)  | 7.6<br>(3.6-13.9) | -10.9%<br>(-12.6%--9.2%)  | 61.2<br>(28.6-122.4) | 32.4%<br>(-25.2%-78.0%)  |
| <b>Ukraine</b>             | 1696.3<br>(1467.0-1944.4) | -3.1%<br>(-8.1%-1.7%)     | 157.5<br>(136.9-179.5) | -1.8%<br>(-6.6%-3.0%)     | 3.8<br>(1.8-7.0) | 27.2%<br>(2.4%-55.5%)    | 7.7<br>(3.7-14.1) | -9.4%<br>(-17.4%--0.1%)   | 59.4<br>(27.8-113.3) | 30.0%<br>(2.2%-65.6%)    |
| <b>Australasia</b>         | 1254.3<br>(1086.1-1424.4) | -37.0%<br>(-39.3%--34.4%) | 113.3<br>(98.3-130.1)  | -35.7%<br>(-37.9%--33.1%) | 2.5<br>(1.2-4.7) | 14.0%<br>(-40.3%-50.8%)  | 4.5<br>(2.1-8.1)  | -41.1%<br>(-44.7%--37.3%) | 28.4<br>(13.6-54.6)  | 9.2%<br>(-45.7%-43.6%)   |
| <b>Australia</b>           | 1257.8                    | -36.4%                    | 113.2<br>(97.9-129.8)  | -35.2%                    | 2.5<br>(1.2-4.8) | 13.4%                    | 4.5<br>(2.1-8.1)  | -40.6%                    | 29.1<br>(13.9-56.1)  | 8.9%                     |

|                                  |                           |                           |                        |                           |                  |                           |                   |                           |                     |                           |
|----------------------------------|---------------------------|---------------------------|------------------------|---------------------------|------------------|---------------------------|-------------------|---------------------------|---------------------|---------------------------|
|                                  | (1088.2-1428.7)           | (-39.3%--33.5%)           |                        | (-37.9%--32.2%)           |                  | (-41.7%--50.7%)           |                   | (-44.9%--35.9%)           |                     | (-46.4%--43.8%)           |
| <b>New Zealand</b>               | 1235.1<br>(1070.2-1401.5) | -39.7%<br>(-42.3%--37.3%) | 114.1<br>(98.8-130.6)  | -37.9%<br>(-40.7%--35.4%) | 2.2<br>(1.0-4.1) | 15.9%<br>(-32.7%--50.8%)  | 4.5<br>(2.1-8.1)  | -43.2%<br>(-47.3%--38.9%) | 24.7<br>(11.9-47.7) | 9.2%<br>(-41.2%--41.8%)   |
| <b>High-income Asia Pacific</b>  | 1303.9<br>(1132.7-1480.4) | -41.6%<br>(-42.3%--40.8%) | 115.5<br>(100.5-131.8) | -39.3%<br>(-40.2%--38.4%) | 0.2<br>(0.1-0.4) | -7.6%<br>(-38.9%--37.3%)  | 4.8<br>(2.3-8.8)  | -46.5%<br>(-47.6%--45.4%) | 2.7<br>(1.5-4.6)    | -14.6%<br>(-41.6%--19.7%) |
| <b>Brunei Darussalam</b>         | 1490.0<br>(1291.5-1704.8) | -33.0%<br>(-35.8%--30.2%) | 131.2<br>(114.2-150.4) | -29.7%<br>(-32.6%--26.7%) | 1.2<br>(0.9-1.5) | 25.8%<br>(-12.4%--75.8%)  | 6.2<br>(2.9-11.5) | -38.3%<br>(-42.8%--33.0%) | 14.8<br>(11.7-18.8) | 14.1%<br>(-20.4%--56.3%)  |
| <b>Japan</b>                     | 1336.5<br>(1163.3-1515.6) | -41.4%<br>(-42.1%--40.8%) | 118.0<br>(102.4-135.1) | -39.0%<br>(-39.8%--38.2%) | 0.2<br>(0.1-0.4) | -2.6%<br>(-39.1%--53.0%)  | 4.9<br>(2.3-9.0)  | -45.9%<br>(-46.9%--44.9%) | 2.6<br>(1.1-4.9)    | -6.2%<br>(-40.2%--39.5%)  |
| <b>Republic of Korea</b>         | 1212.8<br>(1052.7-1381.3) | -37.9%<br>(-40.9%--35.0%) | 110.2<br>(95.2-126.2)  | -38.1%<br>(-41.1%--35.1%) | 0.3<br>(0.2-0.3) | -33.8%<br>(-53.1%--13.3%) | 4.5<br>(2.1-8.2)  | -48.7%<br>(-52.7%--44.6%) | 3.1<br>(2.5-3.7)    | -45.3%<br>(-61.1%--28.2%) |
| <b>Singapore</b>                 | 1090.8<br>(943.8-1236.6)  | -37.5%<br>(-40.0%--34.5%) | 98.0<br>(85.0-112.7)   | -37.5%<br>(-39.9%--34.8%) | 0.4<br>(0.1-1.0) | 28.9%<br>(-41.5%--410.0%) | 4.1<br>(1.9-7.5)  | -44.1%<br>(-48.2%--39.7%) | 5.5<br>(1.9-12.7)   | 20.6%<br>(-47.8%--352.4%) |
| <b>High-income North America</b> | 2214.3<br>(1986.7-2433.8) | -29.2%<br>(-33.7%--23.7%) | 193.5<br>(173.7-215.6) | -28.8%<br>(-33.1%--23.8%) | 2.2<br>(1.1-4.2) | 30.9%<br>(5.6%--50.7%)    | 7.7<br>(3.6-13.7) | -30.4%<br>(-35.2%--24.8%) | 31.6<br>(15.3-59.8) | 25.3%<br>(2.2%--43.5%)    |
| <b>Canada</b>                    | 2175.2                    | -41.8%                    | 189.9                  | -39.1%                    | 1.8              | 12.0%                     | 7.6               | -43.7%                    | 25.5                | 8.6%                      |

|                                 |                           |                           |                        |                           |                  |                           |                   |                           |                     |                          |
|---------------------------------|---------------------------|---------------------------|------------------------|---------------------------|------------------|---------------------------|-------------------|---------------------------|---------------------|--------------------------|
|                                 | (1881.7-2472.5)           | (-44.4%--39.0%)           | (165.0-215.8)          | (-42.0%--36.1%)           | (0.9-3.4)        | (-29.1%--41.1%)           | (3.5-13.9)        | (-47.5%--39.5%)           | (12.7-48.3)         | (-32.7%--35.5%)          |
| <b>Greenland</b>                | 2252.3<br>(1960.7-2570.8) | -38.7%<br>(-41.1%--36.4%) | 197.8<br>(172.4-226.9) | -36.8%<br>(-39.3%--34.2%) | 2.5<br>(1.9-3.2) | -21.1%<br>(-39.8%--3.0%)  | 9.5<br>(4.5-17.2) | -40.6%<br>(-44.8%--36.5%) | 34.8<br>(26.9-46.0) | -24.0%<br>(-43.3%--0.6%) |
| <b>United States of America</b> | 2219.2<br>(1998.2-2434.4) | -27.7%<br>(-32.7%--21.4%) | 193.9<br>(174.5-215.5) | -27.5%<br>(-32.3%--21.6%) | 2.3<br>(1.1-4.3) | 33.2%<br>(6.7%--53.9%)    | 7.7<br>(3.6-13.7) | -28.7%<br>(-34.2%--22.1%) | 32.3<br>(15.6-60.9) | 27.3%<br>(3.6%--46.3%)   |
| <b>Southern Latin America</b>   | 1568.2<br>(1344.5-1775.4) | -25.7%<br>(-28.1%--23.0%) | 145.0<br>(125.3-166.7) | -26.1%<br>(-28.5%--23.2%) | 0.6<br>(0.3-1.2) | 54.9%<br>(14.2%--89.0%)   | 6.6<br>(3.1-11.9) | -33.0%<br>(-36.5%--29.0%) | 8.8<br>(4.2-16.7)   | 50.4%<br>(10.1%--82.9%)  |
| <b>Argentina</b>                | 1561.9<br>(1337.0-1775.6) | -25.3%<br>(-28.4%--21.5%) | 145.2<br>(125.0-167.7) | -25.4%<br>(-28.8%--21.4%) | 0.5<br>(0.2-0.9) | 28.2%<br>(-4.5%--51.3%)   | 6.7<br>(3.1-12.1) | -31.8%<br>(-36.5%--26.1%) | 6.4<br>(3.0-12.3)   | 25.2%<br>(-8.1%--45.5%)  |
| <b>Chile</b>                    | 1545.9<br>(1328.5-1771.4) | -25.0%<br>(-28.4%--21.2%) | 141.8<br>(122.4-162.7) | -26.2%<br>(-29.5%--22.5%) | 1.2<br>(0.6-2.2) | 55.9%<br>(7.0%--109.3%)   | 6.2<br>(2.9-11.2) | -34.5%<br>(-39.0%--29.7%) | 16.2<br>(7.7-31.0)  | 53.1%<br>(5.1%--107.4%)  |
| <b>Uruguay</b>                  | 1727.4<br>(1486.8-1966.7) | -27.5%<br>(-30.7%--24.3%) | 157.8<br>(136.5-179.9) | -27.5%<br>(-30.5%--24.4%) | 0.1<br>(0.1-0.2) | 24.1%<br>(-36.0%--50.0%)  | 7.2<br>(3.4-13.2) | -33.0%<br>(-37.9%--28.0%) | 1.5<br>(0.8-2.9)    | 17.8%<br>(-46.7%--44.9%) |
| <b>Western Europe</b>           | 1902.5<br>(1659.4-2145.4) | -34.2%<br>(-35.1%--33.3%) | 165.2<br>(143.3-189.1) | -32.5%<br>(-33.6%--31.5%) | 1.9<br>(0.9-3.5) | 11.0%<br>(-20.5%--32.6%)  | 7.3<br>(3.4-13.2) | -40.4%<br>(-41.8%--39.0%) | 23.9<br>(11.4-45.4) | 7.0%<br>(-23.7%--27.6%)  |
| <b>Andorra</b>                  | 1874.6<br>(1618.5-2134.4) | -26.2%<br>(-29.5%--22.9%) | 156.8<br>(135.7-179.1) | -25.4%<br>(-28.7%--22.0%) | 1.7<br>(1.0-2.5) | 102.0%<br>(16.0%--216.3%) | 7.1<br>(3.4-12.8) | -33.0%<br>(-37.4%--27.3%) | 22.0<br>(13.2-31.8) | 90.8%<br>(10.6%--198.6%) |

|                |                           |                           |                        |                           |                  |                          |                    |                           |                     |                          |
|----------------|---------------------------|---------------------------|------------------------|---------------------------|------------------|--------------------------|--------------------|---------------------------|---------------------|--------------------------|
| <b>Austria</b> | 1941.6<br>(1682.6-2210.2) | -26.0%<br>(-29.0%--22.5%) | 167.7<br>(145.2-191.8) | -25.9%<br>(-29.3%--22.2%) | 3.3<br>(1.6-6.4) | 19.3%<br>(-18.4%-53.6%)  | 7.4<br>(3.5-13.5)  | -32.8%<br>(-37.4%--27.2%) | 42.1<br>(19.9-81.9) | 19.1%<br>(-20.9%-52.9%)  |
| <b>Belgium</b> | 2138.0<br>(1851.4-2441.6) | -25.5%<br>(-28.7%--22.3%) | 183.0<br>(159.1-211.1) | -25.0%<br>(-28.3%--21.7%) | 1.1<br>(0.5-2.1) | 15.8%<br>(-15.1%-41.1%)  | 8.2<br>(3.9-15.0)  | -32.9%<br>(-38.0%--27.8%) | 14.2<br>(6.8-28.3)  | 14.2%<br>(-15.5%-39.6%)  |
| <b>Cyprus</b>  | 2206.0<br>(1912.5-2509.0) | -22.1%<br>(-25.3%--18.7%) | 189.0<br>(162.8-217.1) | -22.6%<br>(-25.8%--19.1%) | 1.3<br>(0.7-1.6) | 32.4%<br>(-13.2%-104.8%) | 8.4<br>(4.0-15.4)  | -33.5%<br>(-38.1%--28.6%) | 13.8<br>(8.8-17.1)  | 21.4%<br>(-17.6%-84.1%)  |
| <b>Denmark</b> | 2702.0<br>(2342.0-3069.7) | -35.1%<br>(-37.7%--32.4%) | 224.9<br>(194.6-257.5) | -32.4%<br>(-35.3%--29.2%) | 2.6<br>(1.2-4.8) | 9.0%<br>(-33.8%-38.4%)   | 10.4<br>(4.9-19.0) | -40.7%<br>(-44.5%--36.4%) | 31.7<br>(15.4-62.4) | 1.6%<br>(-40.4%-31.4%)   |
| <b>Finland</b> | 1870.1<br>(1620.9-2116.1) | -33.5%<br>(-36.3%--30.1%) | 163.0<br>(141.6-186.0) | -32.1%<br>(-35.1%--28.8%) | 1.3<br>(0.5-2.4) | 19.8%<br>(-15.2%-53.1%)  | 7.1<br>(3.3-12.8)  | -40.3%<br>(-44.7%--35.8%) | 16.0<br>(7.0-28.5)  | 15.4%<br>(-21.0%-46.4%)  |
| <b>France</b>  | 1840.4<br>(1590.2-2078.0) | -31.0%<br>(-34.1%--27.8%) | 159.6<br>(137.0-183.6) | -29.9%<br>(-33.3%--26.6%) | 0.7<br>(0.3-1.3) | -1.3%<br>(-30.4%-41.4%)  | 7.1<br>(3.3-12.7)  | -38.3%<br>(-42.8%--33.8%) | 8.3<br>(3.7-16.3)   | -3.2%<br>(-32.1%-44.4%)  |
| <b>Germany</b> | 1902.4<br>(1653.3-2157.6) | -35.7%<br>(-38.3%--32.8%) | 165.2<br>(143.4-190.5) | -34.2%<br>(-36.9%--31.2%) | 3.3<br>(1.6-6.2) | 18.9%<br>(-18.9%-139.2%) | 7.3<br>(3.4-13.2)  | -42.3%<br>(-46.4%--37.9%) | 42.0<br>(20.1-78.4) | 13.6%<br>(-23.7%-132.3%) |
| <b>Greece</b>  | 2074.4<br>(1794.7-2361.8) | -28.7%<br>(-31.5%--25.6%) | 180.4<br>(155.0-207.4) | -27.5%<br>(-30.8%--24.5%) | 0.4<br>(0.2-0.7) | 5.8%<br>(-19.5%-27.8%)   | 8.1<br>(3.8-14.7)  | -33.3%<br>(-38.3%--28.2%) | 4.5<br>(2.1-8.3)    | 5.2%<br>(-19.9%-28.3%)   |
| <b>Iceland</b> | 1891.2                    | -33.4%                    | 162.8<br>(141.3-187.1) | -32.1%                    | 0.6<br>(0.3-1.1) | 4.3%                     | 7.1<br>(3.3-12.9)  | -38.4%                    | 6.8<br>(3.2-12.9)   | -3.9%                    |

|                    |                           |                           |                        |                           |                  |                          |                   |                           |                     |                           |
|--------------------|---------------------------|---------------------------|------------------------|---------------------------|------------------|--------------------------|-------------------|---------------------------|---------------------|---------------------------|
|                    | (1643.7-2141.3)           | (-36.2%--30.5%)           |                        | (-35.3%--28.8%)           |                  | (-28.4%--28.6%)          |                   | (-42.8%--33.4%)           |                     | (-33.8%--21.1%)           |
| <b>Ireland</b>     | 2118.0<br>(1829.2-2398.1) | -34.1%<br>(-37.0%--31.4%) | 179.4<br>(155.4-205.3) | -34.0%<br>(-36.9%--31.0%) | 3.1<br>(1.5-6.1) | 3.7%<br>(-50.4%--38.1%)  | 8.0<br>(3.7-14.4) | -41.9%<br>(-46.0%--37.7%) | 38.4<br>(18.4-78.5) | 0.3%<br>(-55.9%--35.4%)   |
| <b>Israel</b>      | 2050.4<br>(1789.6-2324.6) | -26.1%<br>(-29.2%--23.2%) | 177.2<br>(154.2-203.7) | -26.0%<br>(-29.1%--23.2%) | 2.5<br>(1.3-4.6) | 18.5%<br>(-12.6%--67.8%) | 8.1<br>(3.8-14.8) | -34.2%<br>(-38.5%--29.6%) | 31.9<br>(15.4-59.0) | 16.3%<br>(-15.8%--61.0%)  |
| <b>Italy</b>       | 1956.9<br>(1706.0-2207.2) | -37.2%<br>(-38.0%--36.2%) | 169.5<br>(146.8-192.4) | -34.0%<br>(-34.9%--32.9%) | 1.9<br>(0.9-3.7) | -7.3%<br>(-44.6%--19.4%) | 7.4<br>(3.5-13.6) | -42.8%<br>(-44.2%--41.4%) | 23.8<br>(11.3-47.4) | -11.4%<br>(-51.7%--14.1%) |
| <b>Luxembourg</b>  | 2152.6<br>(1868.6-2437.8) | -27.7%<br>(-30.8%--24.7%) | 179.9<br>(156.3-206.9) | -27.7%<br>(-30.8%--24.7%) | 1.1<br>(0.5-2.2) | 10.4%<br>(-31.4%--45.1%) | 8.1<br>(3.8-14.6) | -36.1%<br>(-40.5%--30.9%) | 13.8<br>(6.1-28.6)  | 5.9%<br>(-36.0%--38.1%)   |
| <b>Malta</b>       | 2245.0<br>(1945.1-2546.4) | -27.0%<br>(-30.1%--23.4%) | 191.7<br>(165.9-219.0) | -27.1%<br>(-30.4%--23.6%) | 2.1<br>(1.0-4.1) | 13.2%<br>(-21.8%--40.4%) | 8.7<br>(4.1-16.0) | -33.9%<br>(-38.4%--28.6%) | 27.2<br>(12.8-53.3) | 8.4%<br>(-25.2%--37.0%)   |
| <b>Monaco</b>      | 2009.9<br>(1745.1-2272.0) | -30.2%<br>(-33.0%--27.1%) | 163.2<br>(140.9-186.6) | -29.1%<br>(-32.2%--25.9%) | 0.7<br>(0.6-1.0) | 14.3%<br>(-13.5%--53.0%) | 7.7<br>(3.6-14.1) | -35.0%<br>(-39.6%--30.3%) | 9.4<br>(7.1-11.9)   | 9.1%<br>(-18.9%--49.6%)   |
| <b>Netherlands</b> | 1927.8<br>(1669.9-2191.0) | -32.4%<br>(-37.0%--27.6%) | 165.8<br>(144.2-191.3) | -31.5%<br>(-36.1%--26.2%) | 3.1<br>(1.5-5.7) | 9.8%<br>(-11.1%--26.8%)  | 7.2<br>(3.4-13.3) | -38.1%<br>(-43.7%--32.2%) | 38.9<br>(18.8-73.7) | 6.3%<br>(-13.6%--22.0%)   |
| <b>Norway</b>      | 2048.2<br>(1786.7-2324.4) | -30.6%<br>(-31.4%--29.7%) | 174.0<br>(151.2-198.8) | -29.3%<br>(-30.3%--28.3%) | 1.4<br>(0.6-2.6) | 3.8%<br>(-47.0%--33.3%)  | 7.8<br>(3.7-14.1) | -36.9%<br>(-38.2%--35.7%) | 17.2<br>(8.0-33.5)  | 0.5%<br>(-51.9%--28.9%)   |

|                                         |                           |                           |                        |                           |                  |                          |                   |                           |                     |                          |
|-----------------------------------------|---------------------------|---------------------------|------------------------|---------------------------|------------------|--------------------------|-------------------|---------------------------|---------------------|--------------------------|
| <b>Portugal</b>                         | 1944.2<br>(1688.6-2206.4) | -27.1%<br>(-30.1%--23.0%) | 170.1<br>(146.8-194.9) | -26.7%<br>(-29.9%--22.4%) | 2.5<br>(1.2-4.8) | 6.7%<br>(-28.1%-42.7%)   | 7.6<br>(3.5-13.8) | -36.8%<br>(-41.6%--31.8%) | 31.6<br>(14.9-62.0) | 5.1%<br>(-30.4%-39.8%)   |
| <b>San Marino</b>                       | 2005.8<br>(1740.4-2282.7) | -29.9%<br>(-32.9%--26.9%) | 169.1<br>(145.7-194.1) | -28.5%<br>(-31.6%--25.0%) | 1.0<br>(0.6-1.5) | 25.9%<br>(-20.6%-98.9%)  | 7.6<br>(3.6-13.8) | -35.8%<br>(-40.6%--30.8%) | 10.7<br>(6.5-16.6)  | 24.0%<br>(-23.6%-101.9%) |
| <b>Spain</b>                            | 1829.2<br>(1586.2-2077.3) | -30.9%<br>(-33.8%--28.1%) | 158.4<br>(137.5-182.2) | -30.2%<br>(-33.2%--27.1%) | 1.5<br>(0.7-2.8) | 6.6%<br>(-19.2%-34.8%)   | 6.8<br>(3.2-12.2) | -38.5%<br>(-43.5%--34.0%) | 18.7<br>(8.6-37.0)  | 2.7%<br>(-20.5%-30.1%)   |
| <b>Sweden</b>                           | 2004.0<br>(1743.7-2272.2) | -30.0%<br>(-32.5%--27.5%) | 172.9<br>(149.6-198.7) | -28.5%<br>(-31.0%--25.9%) | 1.1<br>(0.5-2.0) | 2.8%<br>(-47.3%-41.0%)   | 8.1<br>(3.7-14.8) | -30.8%<br>(-35.5%--26.1%) | 12.5<br>(6.0-23.6)  | 0.9%<br>(-49.7%-34.7%)   |
| <b>Switzerland</b>                      | 1966.0<br>(1707.6-2240.3) | -28.8%<br>(-31.7%--25.9%) | 166.5<br>(143.8-192.1) | -27.7%<br>(-31.1%--24.8%) | 1.4<br>(0.7-2.6) | 2.4%<br>(-37.2%-32.3%)   | 7.4<br>(3.5-13.5) | -34.1%<br>(-39.1%--29.0%) | 17.0<br>(8.1-32.7)  | -1.9%<br>(-40.4%-25.7%)  |
| <b>United Kingdom</b>                   | 1725.7<br>(1504.5-1956.4) | -40.4%<br>(-41.0%--39.9%) | 153.9<br>(133.5-175.6) | -38.2%<br>(-38.9%--37.4%) | 1.5<br>(0.6-2.6) | 41.9%<br>(-12.4%-510.2%) | 6.7<br>(3.2-12.2) | -45.3%<br>(-46.1%--44.5%) | 18.0<br>(7.7-32.2)  | 32.5%<br>(-18.7%-423.8%) |
| <b>Andean Latin America</b>             | 828.7<br>(715.4-951.2)    | -3.8%<br>(-6.9%--0.8%)    | 84.5<br>(73.1-96.9)    | -4.7%<br>(-7.7%--2.0%)    | 0.1<br>(0.1-0.2) | 19.6%<br>(-8.6%-58.1%)   | 4.1<br>(1.9-7.4)  | -18.0%<br>(-22.3%--13.3%) | 1.8<br>(1.3-2.2)    | 18.8%<br>(-8.9%-54.6%)   |
| <b>Bolivia (Plurinational State of)</b> | 861.1<br>(741.8-981.8)    | -8.9%<br>(-12.9%--4.7%)   | 90.1<br>(77.9-102.9)   | -9.1%<br>(-13.2%--4.5%)   | 0.2<br>(0.1-0.3) | 56.9%<br>(9.4%-122.2%)   | 4.6<br>(2.1-8.2)  | -21.2%<br>(-27.7%--14.4%) | 2.6<br>(1.7-3.6)    | 46.4%<br>(2.8%-104.9%)   |
| <b>Ecuador</b>                          | 866.8                     | -5.4%                     | 87.9                   | -5.9%                     | 0.2              | 100.4%                   | 4.3               | -19.2%                    | 2.0                 | 83.0%                    |

|                            |                         |                          |                       |                         |                   |                         |                  |                           |                      |                         |
|----------------------------|-------------------------|--------------------------|-----------------------|-------------------------|-------------------|-------------------------|------------------|---------------------------|----------------------|-------------------------|
|                            | (745.5-999.2)           | (-9.2%--1.1%)            | (75.8-100.9)          | (-9.7%--2.0%)           | (0.1-0.2)         | (48.2%-171.4%)          | (2.0-7.6)        | (-25.2%--12.4%)           | (1.5-2.6)            | (34.1%-148.8%)          |
| <b>Peru</b>                | 802.7<br>(690.0-923.4)  | -1.6%<br>(-6.1%-3.2%)    | 81.3<br>(69.9-93.6)   | -2.9%<br>(-7.5%-1.4%)   | 0.1<br>(0.1-0.2)  | -3.9%<br>(-33.5%-44.0%) | 3.9<br>(1.8-7.2) | -16.4%<br>(-22.5%--9.2%)  | 1.5<br>(1.0-2.1)     | -5.0%<br>(-35.4%-42.4%) |
| <b>Caribbean</b>           | 985.7<br>(848.4-1129.5) | -5.9%<br>(-7.8%--3.8%)   | 99.3<br>(85.8-114.2)  | -6.3%<br>(-8.0%--4.1%)  | 1.9<br>(1.0-3.4)  | 20.8%<br>(-17.0%-48.0%) | 4.7<br>(2.3-8.5) | -13.5%<br>(-16.9%--10.3%) | 28.1<br>(14.9-49.7)  | 19.1%<br>(-17.7%-47.1%) |
| <b>Antigua and Barbuda</b> | 969.3<br>(836.0-1107.9) | -5.7%<br>(-9.6%--1.1%)   | 95.4<br>(82.1-109.8)  | -6.1%<br>(-10.5%--1.7%) | 2.3<br>(1.1-4.4)  | 46.1%<br>(5.9%-95.7%)   | 4.6<br>(2.2-8.5) | -13.2%<br>(-20.0%--5.8%)  | 33.2<br>(15.7-62.5)  | 37.3%<br>(0.1%-86.6%)   |
| <b>Bahamas</b>             | 946.5<br>(814.2-1081.9) | -5.4%<br>(-9.4%--0.8%)   | 93.2<br>(80.4-107.5)  | -4.1%<br>(-8.4%-0.3%)   | 2.8<br>(1.3-5.3)  | 21.5%<br>(-11.7%-53.1%) | 4.7<br>(2.2-8.5) | -10.8%<br>(-17.9%--3.1%)  | 39.8<br>(19.1-75.1)  | 18.3%<br>(-14.7%-51.5%) |
| <b>Barbados</b>            | 977.9<br>(844.6-1118.7) | -4.6%<br>(-8.8%-0.2%)    | 97.3<br>(84.4-112.0)  | -4.1%<br>(-8.4%-1.0%)   | 7.1<br>(3.4-13.2) | 23.2%<br>(-11.8%-53.2%) | 4.6<br>(2.2-8.3) | -12.2%<br>(-18.5%--4.3%)  | 97.4<br>(46.6-176.1) | 22.0%<br>(-13.1%-55.8%) |
| <b>Belize</b>              | 962.2<br>(831.5-1103.3) | -2.9%<br>(-6.7%-1.9%)    | 98.8<br>(85.3-113.9)  | -3.8%<br>(-7.8%-0.9%)   | 0.6<br>(0.3-1.1)  | 50.9%<br>(-5.5%-106.5%) | 4.9<br>(2.3-8.8) | -9.4%<br>(-16.8%--1.6%)   | 8.5<br>(4.1-16.8)    | 49.4%<br>(-4.9%-108.3%) |
| <b>Bermuda</b>             | 942.0<br>(813.5-1075.2) | -5.3%<br>(-9.2%--1.1%)   | 88.5<br>(76.2-102.0)  | -6.0%<br>(-9.8%--1.9%)  | 3.7<br>(1.8-6.7)  | 0.1%<br>(-34.6%-42.8%)  | 4.1<br>(1.9-7.5) | -16.9%<br>(-22.8%--10.3%) | 47.7<br>(23.4-89.5)  | -4.8%<br>(-40.8%-41.0%) |
| <b>Cuba</b>                | 991.0<br>(846.0-1139.0) | -10.6%<br>(-14.2%--6.4%) | 100.6<br>(86.1-115.8) | -9.9%<br>(-13.6%--5.4%) | 2.8<br>(1.3-5.1)  | 29.8%<br>(-17.4%-78.7%) | 4.5<br>(2.1-8.1) | -18.3%<br>(-24.9%--11.5%) | 41.8<br>(19.0-78.7)  | 27.6%<br>(-18.6%-76.7%) |

|                              |                          |                         |                       |                         |                  |                          |                  |                          |                      |                          |
|------------------------------|--------------------------|-------------------------|-----------------------|-------------------------|------------------|--------------------------|------------------|--------------------------|----------------------|--------------------------|
| <b>Dominica</b>              | 932.6<br>(799.9-1067.6)  | -5.7%<br>(-9.7%--1.5%)  | 94.9<br>(81.7-110.0)  | -6.1%<br>(-10.0%--2.1%) | 1.8<br>(1.4-2.3) | 37.7%<br>(5.0%-80.2%)    | 4.8<br>(2.3-8.5) | -8.7%<br>(-15.9%--1.7%)  | 26.0<br>(20.4-32.8)  | 36.2%<br>(3.6%-79.2%)    |
| <b>Dominican Republic</b>    | 1008.3<br>(867.8-1156.7) | -2.1%<br>(-6.6%-2.9%)   | 100.5<br>(87.0-116.3) | -4.7%<br>(-8.8%--0.3%)  | 0.3<br>(0.2-0.5) | 70.0%<br>(26.3%-128.8%)  | 5.2<br>(2.5-9.3) | -12.6%<br>(-19.9%--5.3%) | 4.7<br>(3.3-6.3)     | 70.8%<br>(24.0%-129.7%)  |
| <b>Grenada</b>               | 1007.9<br>(866.7-1152.7) | -0.9%<br>(-5.4%-4.0%)   | 100.9<br>(86.6-115.7) | -3.7%<br>(-8.5%-0.6%)   | 3.0<br>(1.4-5.6) | 53.1%<br>(-6.8%-109.4%)  | 5.0<br>(2.4-9.1) | -8.9%<br>(-15.6%--1.4%)  | 43.4<br>(20.3-80.1)  | 47.6%<br>(-8.3%-94.2%)   |
| <b>Guyana</b>                | 974.2<br>(843.1-1127.0)  | -2.4%<br>(-7.1%-2.6%)   | 101.8<br>(88.5-117.5) | -3.9%<br>(-8.3%-0.8%)   | 1.1<br>(0.5-2.1) | 50.9%<br>(-3.5%-148.6%)  | 5.2<br>(2.4-9.2) | -8.9%<br>(-16.3%--1.3%)  | 16.1<br>(7.4-31.7)   | 47.7%<br>(-6.7%-145.3%)  |
| <b>Haiti</b>                 | 878.8<br>(754.9-1013.7)  | -6.4%<br>(-10.3%--2.1%) | 95.4<br>(81.7-109.8)  | -5.3%<br>(-9.2%--0.9%)  | 1.2<br>(0.8-2.0) | 0.8%<br>(-32.0%-48.9%)   | 5.2<br>(2.4-9.2) | -13.8%<br>(-20.6%--7.2%) | 18.5<br>(11.8-29.8)  | 2.6%<br>(-30.7%-46.5%)   |
| <b>Jamaica</b>               | 1068.1<br>(921.2-1217.9) | 7.5%<br>(2.7%-12.4%)    | 108.0<br>(92.7-124.7) | 6.4%<br>(1.8%-11.1%)    | 2.2<br>(0.9-4.2) | 40.5%<br>(-19.8%-106.4%) | 5.3<br>(2.5-9.6) | 1.7%<br>(-5.9%-10.5%)    | 32.9<br>(14.2-66.9)  | 45.0%<br>(-19.9%-116.1%) |
| <b>Puerto Rico</b>           | 971.9<br>(836.1-1114.1)  | -2.3%<br>(-6.8%-1.7%)   | 93.1<br>(80.5-107.8)  | -3.7%<br>(-7.8%-0.6%)   | 1.8<br>(0.8-3.6) | 23.8%<br>(-21.1%-69.6%)  | 4.2<br>(2.0-7.6) | -12.1%<br>(-18.9%--5.1%) | 25.5<br>(11.6-51.1)  | 24.2%<br>(-19.8%-72.6%)  |
| <b>Saint Kitts and Nevis</b> | 975.8<br>(839.8-1113.5)  | -3.4%<br>(-7.4%-1.0%)   | 96.9<br>(83.3-111.8)  | -5.6%<br>(-9.7%--0.8%)  | 5.1<br>(2.4-9.9) | 30.0%<br>(-24.1%-70.5%)  | 4.6<br>(2.1-8.1) | -11.8%<br>(-18.8%--3.9%) | 70.1<br>(32.9-135.0) | 25.3%<br>(-27.3%-71.3%)  |

|                                         |                          |                           |                       |                           |                  |                         |                  |                           |                      |                         |
|-----------------------------------------|--------------------------|---------------------------|-----------------------|---------------------------|------------------|-------------------------|------------------|---------------------------|----------------------|-------------------------|
| <b>Saint Lucia</b>                      | 1002.3<br>(864.3-1146.2) | -6.7%<br>(-10.3%--2.6%)   | 101.0<br>(86.7-116.9) | -7.1%<br>(-10.7%--3.0%)   | 3.9<br>(1.9-7.4) | 20.4%<br>(-27.7%-50.4%) | 4.9<br>(2.3-8.7) | -15.1%<br>(-21.4%--8.0%)  | 53.0<br>(25.5-101.5) | 18.7%<br>(-27.5%-52.3%) |
| <b>Saint Vincent and the Grenadines</b> | 1005.1<br>(867.2-1147.8) | -1.4%<br>(-5.7%-3.1%)     | 101.9<br>(87.8-116.4) | -2.7%<br>(-7.2%-1.6%)     | 1.8<br>(0.8-3.3) | 37.4%<br>(-10.8%-98.4%) | 5.1<br>(2.4-9.2) | -5.7%<br>(-12.4%-1.7%)    | 25.0<br>(11.8-47.2)  | 37.4%<br>(-12.0%-97.3%) |
| <b>Suriname</b>                         | 1061.2<br>(910.0-1212.0) | 2.7%<br>(-1.6%-7.8%)      | 106.7<br>(92.0-122.4) | 1.4%<br>(-2.9%-6.8%)      | 0.2<br>(0.2-0.3) | 27.7%<br>(-3.0%-64.9%)  | 5.5<br>(2.6-9.9) | -4.7%<br>(-11.9%-3.4%)    | 3.5<br>(2.8-4.4)     | 31.6%<br>(-0.2%-73.0%)  |
| <b>Trinidad and Tobago</b>              | 1083.1<br>(932.6-1243.3) | -7.2%<br>(-11.4%--3.3%)   | 105.9<br>(91.5-123.0) | -9.0%<br>(-13.1%--4.4%)   | 0.7<br>(0.3-1.3) | 12.1%<br>(-35.1%-72.0%) | 5.4<br>(2.6-9.7) | -14.3%<br>(-22.0%--6.3%)  | 10.2<br>(4.3-20.4)   | 15.5%<br>(-33.0%-74.0%) |
| <b>United States Virgin Islands</b>     | 946.0<br>(818.5-1078.9)  | -0.6%<br>(-5.4%-4.0%)     | 90.6<br>(78.3-103.9)  | -3.5%<br>(-8.1%-0.7%)     | 3.6<br>(2.8-5.0) | 49.1%<br>(12.3%-94.7%)  | 4.5<br>(2.1-8.2) | -8.0%<br>(-15.3%--0.4%)   | 51.5<br>(40.9-68.9)  | 44.6%<br>(9.9%-89.0%)   |
| <b>Central Latin America</b>            | 1038.9<br>(897.5-1190.4) | -15.4%<br>(-16.6%--14.2%) | 104.5<br>(90.2-120.4) | -14.6%<br>(-15.9%--13.4%) | 0.6<br>(0.3-1.2) | 6.5%<br>(-36.6%-46.1%)  | 5.0<br>(2.4-9.1) | -24.4%<br>(-26.6%--21.4%) | 7.9<br>(3.8-15.8)    | 5.5%<br>(-37.9%-45.9%)  |
| <b>Colombia</b>                         | 971.5<br>(838.5-1113.2)  | -18.1%<br>(-21.9%--14.8%) | 98.0<br>(84.2-113.1)  | -18.3%<br>(-22.1%--14.7%) | 0.5<br>(0.2-1.1) | 11.4%<br>(-40.9%-68.3%) | 4.6<br>(2.1-8.1) | -28.4%<br>(-33.9%--22.3%) | 7.2<br>(3.2-15.2)    | 7.4%<br>(-44.0%-69.5%)  |
| <b>Costa Rica</b>                       | 999.9                    | -12.7%                    | 99.3<br>(85.3-114.1)  | -13.6%                    | 0.4<br>(0.2-0.7) | 33.3%                   | 4.6<br>(2.1-8.1) | -19.0%                    | 5.1<br>(2.3-10.1)    | 31.7%                   |

|                                           |                          |                           |                       |                           |                  |                          |                  |                           |                    |                         |
|-------------------------------------------|--------------------------|---------------------------|-----------------------|---------------------------|------------------|--------------------------|------------------|---------------------------|--------------------|-------------------------|
|                                           | (854.8-1146.7)           | (-16.9%--8.7%)            |                       | (-17.5%--9.5%)            |                  | (-12.5%--79.3%)          |                  | (-25.6%--12.1%)           |                    | (-14.4%--79.4%)         |
| <b>El Salvador</b>                        | 971.5<br>(835.5-1119.2)  | -2.9%<br>(-7.5%-2.2%)     | 99.9<br>(85.8-115.1)  | -4.3%<br>(-8.9%-1.2%)     | 0.1<br>(0.1-0.1) | 38.9%<br>(1.2%-87.3%)    | 4.7<br>(2.2-8.5) | -16.3%<br>(-23.4%--8.4%)  | 1.3<br>(0.8-1.7)   | 26.4%<br>(-8.4%-70.0%)  |
| <b>Guatemala</b>                          | 978.0<br>(842.8-1122.8)  | 0.3%<br>(-4.2%-4.7%)      | 102.0<br>(87.6-117.8) | -1.0%<br>(-5.2%-3.8%)     | 0.1<br>(0.0-0.2) | 24.4%<br>(-25.7%-97.3%)  | 5.1<br>(2.4-9.4) | -12.1%<br>(-18.9%--4.7%)  | 1.3<br>(0.6-2.6)   | 20.7%<br>(-26.5%-87.8%) |
| <b>Honduras</b>                           | 1027.6<br>(886.6-1182.1) | -6.7%<br>(-11.0%--1.6%)   | 107.8<br>(93.2-124.3) | -6.8%<br>(-11.2%--1.3%)   | 0.5<br>(0.3-0.7) | 24.3%<br>(-13.1%-87.3%)  | 5.4<br>(2.5-9.6) | -16.0%<br>(-22.9%--8.6%)  | 6.0<br>(3.6-8.4)   | 22.3%<br>(-13.8%-80.3%) |
| <b>Mexico</b>                             | 1087.4<br>(940.4-1246.9) | -15.2%<br>(-16.3%--13.9%) | 108.3<br>(93.5-124.6) | -14.4%<br>(-15.6%--13.3%) | 0.7<br>(0.3-1.5) | 1.6%<br>(-42.3%-46.3%)   | 5.3<br>(2.5-9.5) | -23.3%<br>(-25.7%--19.9%) | 9.8<br>(4.5-20.2)  | 2.1%<br>(-41.6%-47.2%)  |
| <b>Nicaragua</b>                          | 1029.2<br>(886.2-1177.4) | -8.6%<br>(-12.5%--4.3%)   | 105.6<br>(91.1-121.4) | -8.0%<br>(-12.2%--3.7%)   | 0.2<br>(0.1-0.2) | 100.9%<br>(56.7%-156.1%) | 5.0<br>(2.3-9.1) | -20.2%<br>(-26.4%--13.2%) | 2.3<br>(1.8-2.8)   | 77.2%<br>(38.6%-126.0%) |
| <b>Panama</b>                             | 968.6<br>(831.8-1110.1)  | -8.1%<br>(-12.0%--4.4%)   | 95.0<br>(81.7-110.1)  | -10.3%<br>(-14.2%--6.7%)  | 1.1<br>(0.5-2.1) | 29.5%<br>(-31.5%-85.6%)  | 4.6<br>(2.2-8.3) | -16.8%<br>(-23.0%--10.4%) | 14.1<br>(6.3-28.6) | 29.7%<br>(-33.6%-87.8%) |
| <b>Venezuela (Bolivarian Republic of)</b> | 1031.6<br>(883.1-1184.9) | -20.8%<br>(-24.2%--16.5%) | 104.5<br>(89.8-120.7) | -18.8%<br>(-22.7%--14.0%) | 0.5<br>(0.2-0.9) | 14.6%<br>(-22.9%-54.7%)  | 5.0<br>(2.4-8.9) | -29.1%<br>(-35.1%--22.5%) | 6.2<br>(2.9-12.5)  | 13.5%<br>(-25.0%-57.8%) |

|                                     |                           |                           |                       |                           |                  |                          |                   |                           |                     |                          |
|-------------------------------------|---------------------------|---------------------------|-----------------------|---------------------------|------------------|--------------------------|-------------------|---------------------------|---------------------|--------------------------|
| <b>Tropical Latin America</b>       | 941.6<br>(817.7-1072.8)   | -20.7%<br>(-21.9%--19.6%) | 95.0<br>(82.1-108.8)  | -19.8%<br>(-21.0%--18.6%) | 1.2<br>(0.6-2.3) | 15.5%<br>(-16.7%-52.1%)  | 4.6<br>(2.2-8.4)  | -28.5%<br>(-31.0%--25.3%) | 18.7<br>(8.6-35.3)  | 11.2%<br>(-18.9%-46.7%)  |
| <b>Brazil</b>                       | 938.7<br>(815.1-1068.9)   | -21.1%<br>(-22.2%--19.9%) | 94.7<br>(81.9-108.4)  | -20.1%<br>(-21.3%--18.9%) | 1.3<br>(0.6-2.3) | 13.9%<br>(-18.4%-50.1%)  | 4.6<br>(2.2-8.3)  | -28.9%<br>(-31.3%--25.6%) | 19.0<br>(8.7-35.9)  | 10.2%<br>(-20.3%-45.1%)  |
| <b>Paraguay</b>                     | 1068.4<br>(919.2-1232.4)  | -5.3%<br>(-9.5%--0.8%)    | 107.5<br>(92.8-124.3) | -6.0%<br>(-10.3%--1.3%)   | 0.5<br>(0.3-0.6) | 160.9%<br>(76.4%-263.9%) | 5.3<br>(2.5-9.6)  | -14.6%<br>(-20.9%--7.3%)  | 6.8<br>(4.8-9.1)    | 170.5%<br>(85.2%-277.5%) |
| <b>North Africa and Middle East</b> | 1115.6<br>(966.1-1276.4)  | -1.3%<br>(-2.6%-0.1%)     | 109.7<br>(95.0-125.8) | -1.6%<br>(-2.9%--0.3%)    | 0.4<br>(0.3-0.6) | 28.7%<br>(-2.3%-66.2%)   | 5.2<br>(2.5-9.4)  | -15.3%<br>(-17.7%--11.7%) | 6.0<br>(4.9-7.8)    | 18.2%<br>(-12.7%-51.6%)  |
| <b>Afghanistan</b>                  | 1057.5<br>(911.8-1214.2)  | 10.3%<br>(5.4%-15.4%)     | 111.6<br>(96.9-127.0) | 10.4%<br>(5.4%-15.5%)     | 0.1<br>(0.1-0.2) | 66.2%<br>(15.0%-141.1%)  | 6.0<br>(2.8-10.7) | 1.9%<br>(-5.9%-10.3%)     | 1.9<br>(1.2-2.9)    | 64.2%<br>(9.4%-139.9%)   |
| <b>Algeria</b>                      | 1117.6<br>(957.5-1279.1)  | -1.3%<br>(-5.4%-3.2%)     | 109.9<br>(94.9-125.8) | -1.3%<br>(-5.4%-2.8%)     | 0.3<br>(0.2-0.5) | 57.8%<br>(11.7%-130.2%)  | 5.2<br>(2.4-9.4)  | -13.4%<br>(-20.5%--5.8%)  | 4.4<br>(2.7-6.7)    | 55.8%<br>(9.1%-126.7%)   |
| <b>Bahrain</b>                      | 1185.5<br>(1030.1-1351.3) | -2.6%<br>(-7.0%-1.5%)     | 110.1<br>(95.0-126.8) | -2.3%<br>(-6.5%-2.1%)     | 1.5<br>(1.1-1.9) | 26.2%<br>(-12.2%-76.4%)  | 5.2<br>(2.4-9.4)  | -17.0%<br>(-23.5%--10.2%) | 21.0<br>(15.8-27.0) | 12.2%<br>(-24.0%-58.8%)  |
| <b>Egypt</b>                        | 1098.2<br>(943.3-1270.7)  | 7.6%<br>(3.1%-12.8%)      | 111.2<br>(95.7-128.8) | 6.2%<br>(1.6%-11.2%)      | 0.2<br>(0.1-0.3) | 101.6%<br>(43.3%-186.0%) | 5.4<br>(2.5-9.6)  | -5.9%<br>(-13.0%-1.8%)    | 2.7<br>(1.8-3.9)    | 104.7%<br>(43.1%-188.5%) |

|                                   |                           |                          |                        |                         |                  |                          |                   |                           |                  |                          |
|-----------------------------------|---------------------------|--------------------------|------------------------|-------------------------|------------------|--------------------------|-------------------|---------------------------|------------------|--------------------------|
| <b>Iran (Islamic Republic of)</b> | 1139.5<br>(989.9-1301.2)  | 5.8%<br>(4.6%-7.1%)      | 110.7<br>(95.9-127.0)  | 4.9%<br>(3.7%-6.2%)     | 0.3<br>(0.2-0.3) | 153.3%<br>(45.0%-280.4%) | 5.1<br>(2.5-9.3)  | -6.9%<br>(-9.5%--3.2%)    | 4.1<br>(3.0-4.7) | 162.8%<br>(58.5%-280.5%) |
| <b>Iraq</b>                       | 1233.9<br>(1061.9-1416.8) | -11.1%<br>(-15.1%--7.5%) | 121.3<br>(105.1-139.7) | -9.6%<br>(-13.7%--5.7%) | 0.1<br>(0.1-0.2) | 20.3%<br>(-17.4%-86.9%)  | 5.8<br>(2.7-10.6) | -20.7%<br>(-26.7%--14.0%) | 1.9<br>(1.5-2.9) | 12.9%<br>(-25.9%-77.0%)  |
| <b>Jordan</b>                     | 1191.4<br>(1029.6-1367.4) | -2.0%<br>(-5.7%-2.3%)    | 117.1<br>(100.9-134.6) | -1.9%<br>(-6.0%-2.9%)   | 0.1<br>(0.1-0.1) | 20.5%<br>(-13.3%-60.1%)  | 5.4<br>(2.5-9.8)  | -15.2%<br>(-21.1%--7.4%)  | 1.4<br>(1.1-1.8) | 15.4%<br>(-15.7%-52.6%)  |
| <b>Kuwait</b>                     | 1119.9<br>(964.7-1278.0)  | 2.1%<br>(-1.8%-6.0%)     | 102.6<br>(88.5-118.1)  | 2.7%<br>(-1.5%-7.2%)    | 0.1<br>(0.1-0.2) | 54.7%<br>(-4.5%-127.3%)  | 4.8<br>(2.2-8.6)  | -8.5%<br>(-15.2%--1.9%)   | 1.5<br>(0.7-3.1) | 48.4%<br>(-9.8%-112.7%)  |
| <b>Lebanon</b>                    | 1364.4<br>(1173.5-1570.3) | 3.8%<br>(-0.5%-8.1%)     | 130.3<br>(112.6-151.0) | 2.9%<br>(-1.9%-7.3%)    | 0.3<br>(0.2-0.3) | 75.7%<br>(7.1%-175.7%)   | 5.7<br>(2.7-10.5) | -14.5%<br>(-20.8%--7.6%)  | 3.4<br>(2.3-4.5) | 74.3%<br>(7.0%-172.8%)   |
| <b>Libya</b>                      | 1113.0<br>(963.7-1277.6)  | 3.1%<br>(-1.1%-7.5%)     | 109.6<br>(94.9-125.6)  | 6.6%<br>(2.1%-11.0%)    | 0.2<br>(0.1-0.2) | 98.4%<br>(25.4%-209.8%)  | 5.2<br>(2.4-9.5)  | -6.8%<br>(-13.8%-0.2%)    | 2.3<br>(1.4-3.2) | 102.1%<br>(27.3%-218.7%) |
| <b>Morocco</b>                    | 1082.0<br>(936.2-1239.1)  | -0.6%<br>(-4.5%-3.5%)    | 108.9<br>(94.1-125.2)  | -1.6%<br>(-5.7%-2.8%)   | 0.2<br>(0.2-0.3) | 133.6%<br>(61.2%-223.8%) | 5.4<br>(2.5-9.8)  | -13.0%<br>(-19.1%--5.0%)  | 3.1<br>(2.1-4.2) | 124.6%<br>(56.6%-207.7%) |
| <b>Oman</b>                       | 1171.0<br>(1007.0-1335.1) | 8.9%<br>(4.5%-13.7%)     | 110.5<br>(94.9-127.3)  | 8.3%<br>(4.1%-13.5%)    | 0.4<br>(0.2-0.6) | 126.9%<br>(54.9%-253.7%) | 5.1<br>(2.4-9.3)  | -7.0%<br>(-13.4%--0.1%)   | 5.8<br>(3.2-8.4) | 110.1%<br>(40.7%-229.7%) |

|                             |                           |                           |                       |                           |                  |                          |                  |                           |                     |                          |
|-----------------------------|---------------------------|---------------------------|-----------------------|---------------------------|------------------|--------------------------|------------------|---------------------------|---------------------|--------------------------|
| <b>Palestine</b>            | 1082.9<br>(937.9-1244.8)  | 0.8%<br>(-3.7%-5.3%)      | 109.4<br>(94.9-124.7) | -0.5%<br>(-4.9%-4.0%)     | 0.1<br>(0.1-0.1) | 35.3%<br>(-6.4%-119.3%)  | 5.1<br>(2.4-8.9) | -8.2%<br>(-14.9%--0.8%)   | 1.3<br>(1.0-1.6)    | 29.8%<br>(-9.2%-100.9%)  |
| <b>Qatar</b>                | 1074.1<br>(930.3-1221.9)  | -15.1%<br>(-19.0%--11.4%) | 97.6<br>(84.6-112.5)  | -12.2%<br>(-16.1%--8.3%)  | 1.3<br>(0.8-1.8) | 136.1%<br>(53.8%-311.2%) | 4.6<br>(2.2-8.3) | -29.3%<br>(-34.9%--23.5%) | 13.1<br>(8.3-18.3)  | 86.2%<br>(20.3%-236.5%)  |
| <b>Saudi Arabia</b>         | 978.5<br>(844.5-1111.6)   | 1.2%<br>(-3.5%-5.2%)      | 93.1<br>(80.4-107.5)  | 1.6%<br>(-3.5%-5.7%)      | 0.1<br>(0.1-0.1) | 43.0%<br>(-8.8%-164.2%)  | 4.3<br>(2.0-7.8) | -14.7%<br>(-21.4%--7.7%)  | 1.3<br>(1.0-1.6)    | 32.7%<br>(-13.5%-139.2%) |
| <b>Sudan</b>                | 918.3<br>(793.6-1047.5)   | 6.7%<br>(2.0%-11.4%)      | 95.8<br>(82.5-109.3)  | 5.7%<br>(0.7%-10.1%)      | 0.2<br>(0.1-0.3) | 103.7%<br>(36.7%-199.1%) | 4.8<br>(2.2-8.6) | -5.2%<br>(-12.9%-3.0%)    | 2.6<br>(1.6-3.9)    | 98.7%<br>(35.0%-192.0%)  |
| <b>Syrian Arab Republic</b> | 1044.8<br>(899.5-1195.2)  | -5.4%<br>(-9.2%--1.2%)    | 107.3<br>(92.7-123.3) | -4.4%<br>(-8.0%-0.0%)     | 0.1<br>(0.1-0.1) | 22.3%<br>(-14.2%-77.4%)  | 4.8<br>(2.3-8.6) | -18.3%<br>(-24.0%--11.4%) | 1.1<br>(0.8-1.4)    | 17.9%<br>(-16.8%-69.5%)  |
| <b>Tunisia</b>              | 1164.6<br>(1007.2-1327.4) | 3.1%<br>(-1.8%-8.3%)      | 113.2<br>(98.6-129.8) | 1.3%<br>(-3.5%-6.0%)      | 0.2<br>(0.2-0.3) | 90.8%<br>(30.8%-169.1%)  | 5.2<br>(2.5-9.6) | -10.8%<br>(-18.0%--3.1%)  | 3.0<br>(2.0-4.1)    | 90.5%<br>(29.9%-172.2%)  |
| <b>Turkey</b>               | 1149.4<br>(994.1-1313.7)  | -14.2%<br>(-17.9%--10.3%) | 110.0<br>(95.5-126.1) | -14.6%<br>(-18.3%--10.5%) | 1.0<br>(0.7-1.6) | -0.7%<br>(-31.7%-39.1%)  | 5.1<br>(2.4-9.4) | -30.0%<br>(-35.5%--23.6%) | 15.9<br>(12.1-23.1) | -9.3%<br>(-38.6%-27.2%)  |
| <b>United Arab Emirates</b> | 1062.5<br>(915.3-1220.1)  | -3.1%<br>(-7.5%-1.0%)     | 99.5<br>(86.0-115.2)  | 1.4%<br>(-3.2%-6.2%)      | 0.3<br>(0.2-0.7) | 63.3%<br>(-5.2%-185.3%)  | 5.1<br>(2.4-9.3) | -12.6%<br>(-19.1%--5.9%)  | 5.2<br>(2.4-9.9)    | 65.1%<br>(-6.2%-195.9%)  |

|                   |                           |                       |                        |                       |                  |                          |                   |                           |                  |                          |
|-------------------|---------------------------|-----------------------|------------------------|-----------------------|------------------|--------------------------|-------------------|---------------------------|------------------|--------------------------|
| <b>Yemen</b>      | 1023.0<br>(885.9-1164.3)  | 2.3%<br>(-2.1%-7.2%)  | 107.2<br>(92.6-123.4)  | 3.7%<br>(-0.4%-8.9%)  | 0.2<br>(0.1-0.2) | 83.3%<br>(17.3%-180.2%)  | 5.4<br>(2.5-9.7)  | -6.8%<br>(-13.7%-0.6%)    | 2.2<br>(1.4-3.4) | 76.1%<br>(13.8%-166.5%)  |
| <b>South Asia</b> | 917.3<br>(797.7-1047.2)   | -0.1%<br>(-1.1%-0.8%) | 93.1<br>(80.5-106.5)   | -0.6%<br>(-1.6%-0.3%) | 0.3<br>(0.2-0.4) | 71.1%<br>(11.6%-114.9%)  | 4.8<br>(2.3-8.4)  | -10.8%<br>(-13.2%--7.4%)  | 4.2<br>(3.1-5.3) | 67.9%<br>(8.9%-113.3%)   |
| <b>Bangladesh</b> | 819.9<br>(708.8-939.1)    | -3.0%<br>(-7.1%-1.2%) | 85.1<br>(73.5-97.5)    | -2.7%<br>(-6.5%-1.5%) | 0.3<br>(0.2-0.5) | 126.0%<br>(29.7%-248.9%) | 4.2<br>(2.0-7.5)  | -16.8%<br>(-23.5%--8.9%)  | 4.6<br>(2.4-6.8) | 113.2%<br>(21.6%-233.4%) |
| <b>Bhutan</b>     | 853.5<br>(736.3-971.8)    | -3.9%<br>(-8.1%-0.5%) | 85.8<br>(74.1-98.4)    | -4.0%<br>(-8.3%-0.6%) | 0.4<br>(0.3-0.6) | 152.1%<br>(38.9%-286.1%) | 4.3<br>(2.0-7.7)  | -19.6%<br>(-26.1%--11.8%) | 5.9<br>(3.5-9.0) | 138.1%<br>(30.6%-262.9%) |
| <b>India</b>      | 918.9<br>(797.5-1050.7)   | 0.9%<br>(-0.1%-1.9%)  | 92.9<br>(80.3-106.4)   | -0.3%<br>(-1.3%-0.7%) | 0.3<br>(0.2-0.4) | 70.3%<br>(5.7%-118.0%)   | 4.8<br>(2.3-8.4)  | -9.2%<br>(-11.8%--5.7%)   | 4.0<br>(3.0-5.1) | 66.1%<br>(3.3%-117.0%)   |
| <b>Nepal</b>      | 899.0<br>(777.8-1033.4)   | -3.2%<br>(-7.1%-1.0%) | 93.5<br>(80.6-107.4)   | -2.3%<br>(-6.4%-2.3%) | 0.3<br>(0.2-0.4) | 145.7%<br>(51.7%-262.7%) | 4.8<br>(2.3-8.4)  | -15.4%<br>(-22.2%--7.2%)  | 4.3<br>(2.7-6.0) | 128.2%<br>(37.1%-234.2%) |
| <b>Pakistan</b>   | 1032.9<br>(893.3-1180.7)  | 1.6%<br>(-1.2%-4.6%)  | 104.6<br>(90.5-119.6)  | 2.3%<br>(-0.5%-5.2%)  | 0.4<br>(0.3-0.5) | 71.4%<br>(19.3%-130.0%)  | 5.7<br>(2.7-10.2) | -5.8%<br>(-10.5%--0.7%)   | 5.4<br>(3.6-7.7) | 69.5%<br>(16.0%-132.0%)  |
| <b>East Asia</b>  | 1426.7<br>(1238.8-1627.0) | 6.8%<br>(5.5%-8.1%)   | 125.6<br>(109.3-143.5) | 3.2%<br>(2.0%-4.4%)   | 0.1<br>(0.1-0.2) | 21.1%<br>(-13.7%-51.8%)  | 6.9<br>(3.2-12.5) | -13.4%<br>(-17.8%--8.4%)  | 1.9<br>(1.6-2.4) | 15.3%<br>(-18.4%-46.5%)  |
| <b>China</b>      | 1423.8                    | 7.0%<br>(5.7%-8.3%)   | 125.4<br>(109.1-143.4) | 3.3%<br>(2.0%-4.6%)   | 0.1<br>(0.1-0.2) | 21.2%                    | 6.9<br>(3.2-12.5) | -13.6%                    | 2.0<br>(1.6-2.4) | 15.4%                    |

|                                     |                           |                       |                        |                       |                  |                         |                    |                          |                  |                         |
|-------------------------------------|---------------------------|-----------------------|------------------------|-----------------------|------------------|-------------------------|--------------------|--------------------------|------------------|-------------------------|
|                                     | (1234.8-1625.3)           |                       |                        |                       |                  | (-14.3%-52.3%)          |                    | (-18.1%--8.4%)           |                  | (-19.3%-46.8%)          |
| <b>Democratic Republic of Korea</b> | 1403.8<br>(1210.9-1614.9) | 3.1%<br>(-1.8%-7.9%)  | 132.6<br>(115.0-151.1) | 5.4%<br>(0.9%-10.1%)  | 0.1<br>(0.1-0.1) | 6.9%<br>(-22.1%-50.2%)  | 7.8<br>(3.6-14.3)  | 0.9%<br>(-7.4%-9.8%)     | 1.7<br>(1.3-2.2) | 8.5%<br>(-21.7%-57.1%)  |
| <b>Taiwan (Province of China)</b>   | 1635.9<br>(1445.7-1810.8) | 2.4%<br>(-4.4%-11.6%) | 132.2<br>(117.2-147.1) | -1.2%<br>(-7.5%-6.8%) | 0.1<br>(0.0-0.2) | 26.0%<br>(-18.3%-84.1%) | 7.2<br>(3.3-12.9)  | -12.2%<br>(-20.9%--2.1%) | 1.3<br>(0.6-2.8) | 19.2%<br>(-22.8%-78.3%) |
| <b>Oceania</b>                      | 1450.5<br>(1258.7-1653.5) | 9.3%<br>(6.6%-12.9%)  | 139.2<br>(120.9-159.1) | 8.9%<br>(6.0%-12.1%)  | 0.2<br>(0.2-0.3) | 47.8%<br>(10.3%-92.8%)  | 8.5<br>(4.0-15.5)  | 4.7%<br>(-0.4%-10.4%)    | 3.1<br>(2.4-4.6) | 49.0%<br>(13.7%-95.2%)  |
| <b>American Samoa</b>               | 1695.9<br>(1466.5-1935.0) | 10.4%<br>(5.8%-15.0%) | 152.9<br>(132.1-176.0) | 13.3%<br>(8.8%-17.7%) | 0.3<br>(0.3-0.4) | 61.7%<br>(18.0%-116.1%) | 9.1<br>(4.2-16.1)  | 4.4%<br>(-3.0%-12.6%)    | 5.6<br>(4.5-7.0) | 58.0%<br>(15.9%-113.0%) |
| <b>Cook Islands</b>                 | 1590.7<br>(1374.8-1815.4) | 13.4%<br>(8.3%-18.2%) | 140.6<br>(121.4-161.4) | 11.4%<br>(6.7%-16.3%) | 0.4<br>(0.3-0.5) | 57.7%<br>(2.9%-128.7%)  | 7.7<br>(3.6-14.0)  | 4.8%<br>(-2.4%-12.8%)    | 6.8<br>(4.8-9.0) | 52.7%<br>(-1.3%-129.4%) |
| <b>Fiji</b>                         | 1774.9<br>(1535.1-2020.3) | 10.5%<br>(6.2%-14.8%) | 164.0<br>(142.5-187.4) | 9.1%<br>(5.1%-13.5%)  | 0.2<br>(0.2-0.3) | 66.4%<br>(-0.6%-155.3%) | 10.0<br>(4.7-17.8) | 5.7%<br>(-1.8%-13.5%)    | 3.3<br>(2.2-4.3) | 55.5%<br>(-5.0%-134.0%) |
| <b>Guam</b>                         | 1437.8                    | 16.8%                 | 124.1<br>(107.4-142.6) | 16.9%                 | 0.2<br>(0.2-0.3) | 16.6%                   | 7.5<br>(3.5-13.6)  | 13.9%                    | 3.9<br>(3.0-4.9) | 47.8%                   |

|                                         |                           |                        |                        |                        |                  |                         |                    |                        |                  |                         |
|-----------------------------------------|---------------------------|------------------------|------------------------|------------------------|------------------|-------------------------|--------------------|------------------------|------------------|-------------------------|
|                                         | (1239.0-1638.4)           | (12.2%-22.1%)          |                        | (12.7%-21.9%)          |                  | (-22.7%-62.8%)          |                    | (5.4%-22.9%)           |                  | (-4.6%-109.2%)          |
| <b>Kiribati</b>                         | 2009.4<br>(1734.3-2306.4) | 28.6%<br>(23.1%-34.7%) | 192.4<br>(166.6-220.9) | 27.5%<br>(22.4%-33.7%) | 0.2<br>(0.1-0.5) | 15.9%<br>(-15.2%-60.8%) | 12.5<br>(5.9-23.0) | 23.4%<br>(13.2%-34.7%) | 3.3<br>(2.3-6.6) | 8.4%<br>(-23.2%-50.5%)  |
| <b>Marshall Islands</b>                 | 1467.4<br>(1269.2-1670.8) | 9.1%<br>(4.6%-13.7%)   | 143.2<br>(124.4-164.2) | 9.8%<br>(5.1%-14.9%)   | 0.3<br>(0.2-0.5) | 48.8%<br>(10.3%-109.5%) | 8.5<br>(4.1-15.2)  | 2.6%<br>(-5.1%-11.4%)  | 5.6<br>(3.9-7.9) | 44.0%<br>(3.2%-107.6%)  |
| <b>Micronesia (Federated States of)</b> | 1498.4<br>(1294.4-1722.9) | 10.3%<br>(5.2%-15.2%)  | 145.5<br>(125.7-166.8) | 10.2%<br>(5.6%-14.7%)  | 0.4<br>(0.3-0.5) | 70.1%<br>(17.7%-142.8%) | 8.6<br>(4.0-15.5)  | 0.9%<br>(-6.8%-9.5%)   | 6.2<br>(4.3-9.0) | 67.4%<br>(7.9%-146.1%)  |
| <b>Nauru</b>                            | 1569.7<br>(1350.0-1788.5) | 12.1%<br>(7.3%-17.3%)  | 148.6<br>(127.9-169.9) | 16.8%<br>(12.1%-22.0%) | 0.4<br>(0.3-0.5) | 17.5%<br>(-13.3%-54.7%) | 8.5<br>(3.9-15.0)  | 5.4%<br>(-2.8%-14.3%)  | 6.2<br>(4.4-8.7) | 18.3%<br>(-14.5%-59.0%) |
| <b>Niue</b>                             | 1589.9<br>(1376.4-1814.8) | 11.3%<br>(6.3%-15.9%)  | 146.2<br>(127.2-167.7) | 10.9%<br>(6.4%-16.0%)  | 0.4<br>(0.3-0.5) | 52.3%<br>(10.3%-111.3%) | 8.0<br>(3.8-14.4)  | 1.3%<br>(-6.4%-9.7%)   | 6.1<br>(4.6-8.0) | 54.8%<br>(9.9%-118.7%)  |
| <b>Northern Mariana Islands</b>         | 1410.8<br>(1225.4-1602.0) | 9.8%<br>(5.6%-14.5%)   | 126.6<br>(109.1-145.0) | 14.0%<br>(9.9%-18.9%)  | 0.6<br>(0.4-0.8) | 65.5%<br>(13.6%-138.5%) | 7.0<br>(3.2-12.6)  | 3.4%<br>(-4.2%-12.3%)  | 7.7<br>(5.4-9.6) | 60.8%<br>(11.2%-128.2%) |
| <b>Palau</b>                            | 1567.0<br>(1353.4-1782.9) | 11.9%<br>(7.5%-17.1%)  | 143.9<br>(125.1-164.7) | 11.9%<br>(7.2%-17.2%)  | 0.1<br>(0.1-0.1) | 19.7%<br>(-21.2%-81.8%) | 7.9<br>(3.7-14.2)  | 4.8%<br>(-3.0%-13.8%)  | 1.4<br>(1.0-2.0) | 16.8%<br>(-29.7%-94.3%) |

|                         |                           |                       |                        |                       |                  |                         |                   |                        |                  |                         |
|-------------------------|---------------------------|-----------------------|------------------------|-----------------------|------------------|-------------------------|-------------------|------------------------|------------------|-------------------------|
| <b>Papua New Guinea</b> | 1356.0<br>(1173.6-1550.6) | 9.2%<br>(4.8%-14.4%)  | 132.7<br>(115.3-152.4) | 8.8%<br>(4.4%-13.7%)  | 0.2<br>(0.1-0.3) | 51.0%<br>(7.1%-115.8%)  | 8.2<br>(3.9-14.9) | 4.8%<br>(-2.9%-13.2%)  | 2.7<br>(1.8-4.7) | 55.4%<br>(11.1%-125.2%) |
| <b>Samoa</b>            | 1783.9<br>(1542.9-2044.5) | 13.7%<br>(8.8%-18.3%) | 166.8<br>(144.1-192.4) | 12.9%<br>(8.0%-18.1%) | 0.3<br>(0.2-0.4) | 28.1%<br>(-5.1%-79.3%)  | 9.8<br>(4.5-17.4) | 7.0%<br>(-0.7%-15.2%)  | 4.8<br>(3.5-6.5) | 26.9%<br>(-10.1%-81.9%) |
| <b>Solomon Islands</b>  | 1462.7<br>(1269.7-1676.4) | 12.9%<br>(8.3%-17.9%) | 145.2<br>(126.0-165.7) | 12.7%<br>(8.1%-17.4%) | 0.2<br>(0.2-0.3) | 48.4%<br>(8.2%-102.4%)  | 8.5<br>(4.0-15.1) | 6.1%<br>(-1.7%-14.6%)  | 3.7<br>(2.5-5.7) | 44.3%<br>(2.9%-103.6%)  |
| <b>Tokelau</b>          | 1554.6<br>(1339.8-1788.2) | 10.9%<br>(6.2%-15.6%) | 146.4<br>(126.5-167.7) | 8.3%<br>(4.0%-12.7%)  | 0.3<br>(0.2-0.4) | 66.6%<br>(17.0%-136.2%) | 8.3<br>(3.8-14.7) | -0.3%<br>(-7.9%-8.4%)  | 4.5<br>(3.1-6.0) | 67.1%<br>(17.7%-140.5%) |
| <b>Tonga</b>            | 1695.2<br>(1460.3-1944.2) | 10.9%<br>(5.9%-15.2%) | 158.7<br>(136.3-181.9) | 10.1%<br>(5.5%-14.4%) | 0.3<br>(0.2-0.4) | 51.2%<br>(12.3%-108.1%) | 9.4<br>(4.4-17.0) | 5.8%<br>(-1.5%-13.9%)  | 4.5<br>(3.2-6.1) | 57.8%<br>(13.7%-123.4%) |
| <b>Tuvalu</b>           | 1563.8<br>(1352.9-1791.4) | 10.3%<br>(5.1%-15.2%) | 151.3<br>(130.0-172.9) | 9.5%<br>(4.3%-13.9%)  | 0.3<br>(0.2-0.4) | 51.2%<br>(3.2%-119.9%)  | 8.8<br>(4.1-15.7) | 0.8%<br>(-7.1%-9.3%)   | 4.4<br>(3.2-6.4) | 46.6%<br>(-2.3%-113.8%) |
| <b>Vanuatu</b>          | 1547.3<br>(1337.0-1764.1) | 13.3%<br>(8.7%-18.7%) | 151.1<br>(131.2-173.5) | 13.2%<br>(7.6%-18.6%) | 0.2<br>(0.2-0.4) | 87.9%<br>(22.2%-182.9%) | 9.3<br>(4.5-16.5) | 9.4%<br>(1.2%-17.6%)   | 3.8<br>(2.6-5.9) | 91.9%<br>(21.4%-202.3%) |
| <b>Southeast Asia</b>   | 1511.7<br>(1314.0-1725.4) | 4.2%<br>(2.8%-5.7%)   | 140.6<br>(122.2-161.0) | 2.1%<br>(0.8%-3.3%)   | 0.2<br>(0.2-0.2) | 52.9%<br>(23.5%-80.5%)  | 8.1<br>(3.8-14.7) | -6.4%<br>(-9.4%--2.6%) | 3.0<br>(2.3-3.7) | 52.7%<br>(22.4%-82.0%)  |
| <b>Cambodia</b>         | 1432.9                    | -2.6%<br>(-7.4%-1.7%) | 139.3<br>(121.0-160.0) | -3.7%<br>(-8.2%-0.7%) | 0.2<br>(0.1-0.2) | 72.7%                   | 8.1<br>(3.8-14.4) | -14.3%                 | 2.4<br>(1.6-3.5) | 64.6%                   |

|                                         |                           |                         |                        |                         |                  |                          |                   |                          |                  |                          |
|-----------------------------------------|---------------------------|-------------------------|------------------------|-------------------------|------------------|--------------------------|-------------------|--------------------------|------------------|--------------------------|
|                                         | (1240.1-1630.6)           |                         |                        |                         |                  | (13.1%-147.6%)           |                   | (-21.6%--5.5%)           |                  | (7.1%-143.7%)            |
| <b>Indonesia</b>                        | 1640.1<br>(1423.8-1871.0) | 12.2%<br>(10.2%-14.2%)  | 151.3<br>(131.9-172.7) | 9.2%<br>(7.3%-11.1%)    | 0.3<br>(0.2-0.4) | 90.2%<br>(47.4%-140.5%)  | 9.2<br>(4.3-16.8) | 4.1%<br>(0.0%-9.6%)      | 3.8<br>(2.5-5.5) | 81.2%<br>(36.9%-131.3%)  |
| <b>Lao People's Democratic Republic</b> | 1464.4<br>(1268.9-1669.9) | -3.0%<br>(-7.2%-1.5%)   | 139.9<br>(121.1-160.9) | -4.3%<br>(-8.4%-0.2%)   | 0.2<br>(0.1-0.3) | 63.5%<br>(15.7%-134.3%)  | 8.7<br>(4.1-15.8) | -13.3%<br>(-20.6%--3.6%) | 3.1<br>(2.1-4.1) | 59.7%<br>(8.2%-143.6%)   |
| <b>Malaysia</b>                         | 1428.6<br>(1239.9-1623.5) | -2.5%<br>(-6.4%-2.0%)   | 128.5<br>(112.0-147.5) | -3.8%<br>(-7.5%-1.0%)   | 0.2<br>(0.1-0.2) | 80.1%<br>(30.9%-144.8%)  | 7.2<br>(3.4-12.9) | -14.0%<br>(-20.4%--6.9%) | 2.6<br>(1.9-3.3) | 69.9%<br>(22.2%-132.2%)  |
| <b>Maldives</b>                         | 1410.2<br>(1213.8-1607.2) | 2.9%<br>(-2.0%-7.4%)    | 129.2<br>(111.6-148.2) | 0.0%<br>(-4.7%-4.2%)    | 0.4<br>(0.3-0.7) | 76.2%<br>(-22.8%-178.5%) | 6.9<br>(3.2-12.4) | -14.9%<br>(-21.8%--6.0%) | 5.4<br>(3.9-8.7) | 47.2%<br>(-37.2%-145.1%) |
| <b>Mauritius</b>                        | 1679.0<br>(1448.0-1928.6) | 7.6%<br>(3.2%-12.0%)    | 149.3<br>(129.6-170.9) | 5.4%<br>(1.2%-9.4%)     | 0.3<br>(0.1-0.6) | 66.2%<br>(5.0%-152.2%)   | 8.4<br>(4.0-15.4) | -0.5%<br>(-8.5%-7.4%)    | 4.3<br>(2.0-8.9) | 61.0%<br>(0.7%-144.0%)   |
| <b>Myanmar</b>                          | 1678.4<br>(1454.3-1914.2) | -6.6%<br>(-11.3%--2.0%) | 158.5<br>(138.2-180.1) | -8.6%<br>(-13.4%--4.2%) | 0.2<br>(0.2-0.3) | 47.6%<br>(4.6%-105.4%)   | 9.6<br>(4.6-17.5) | -16.7%<br>(-24.5%--7.9%) | 3.3<br>(2.5-4.5) | 38.1%<br>(-6.7%-99.3%)   |
| <b>Philippines</b>                      | 1513.0<br>(1314.5-1724.1) | 8.3%<br>(7.4%-9.1%)     | 140.9<br>(122.9-161.4) | 6.7%<br>(5.9%-7.5%)     | 0.2<br>(0.1-0.2) | 46.4%<br>(18.4%-75.4%)   | 8.6<br>(4.0-15.6) | 4.2%<br>(2.1%-6.6%)      | 3.0<br>(2.4-3.7) | 63.6%<br>(25.5%-104.4%)  |

|                                   |                           |                         |                        |                          |                  |                         |                   |                           |                     |                          |
|-----------------------------------|---------------------------|-------------------------|------------------------|--------------------------|------------------|-------------------------|-------------------|---------------------------|---------------------|--------------------------|
| <b>Seychelles</b>                 | 1515.7<br>(1312.9-1735.4) | 5.6%<br>(1.2%-10.4%)    | 133.6<br>(116.2-153.1) | 4.6%<br>(0.3%-8.7%)      | 0.3<br>(0.2-0.5) | 31.0%<br>(-4.1%-79.2%)  | 7.9<br>(3.7-14.1) | -4.8%<br>(-12.3%-3.2%)    | 5.2<br>(3.1-7.4)    | 28.2%<br>(-4.9%-68.8%)   |
| <b>Sri Lanka</b>                  | 1464.3<br>(1267.8-1671.0) | 8.9%<br>(4.7%-14.6%)    | 133.8<br>(117.1-153.5) | 5.5%<br>(1.4%-10.5%)     | 0.1<br>(0.1-0.2) | 55.7%<br>(-9.5%-140.2%) | 7.2<br>(3.3-13.0) | -5.0%<br>(-11.8%-3.3%)    | 2.3<br>(1.5-3.1)    | 51.1%<br>(-19.7%-144.1%) |
| <b>Thailand</b>                   | 1269.0<br>(1094.5-1449.2) | -9.6%<br>(-13.5%--5.4%) | 116.2<br>(100.1-134.4) | -10.1%<br>(-14.2%--5.7%) | 0.1<br>(0.1-0.1) | 11.9%<br>(-22.5%-55.9%) | 6.3<br>(3.0-11.4) | -20.8%<br>(-27.6%--13.6%) | 1.0<br>(0.8-1.4)    | 7.8%<br>(-24.4%-52.9%)   |
| <b>Timor-Leste</b>                | 1425.5<br>(1231.5-1632.6) | 4.7%<br>(-0.1%-9.9%)    | 136.7<br>(118.5-156.2) | 3.8%<br>(-1.0%-9.1%)     | 0.2<br>(0.1-0.3) | 95.7%<br>(34.0%-201.8%) | 8.2<br>(3.8-14.7) | -6.3%<br>(-14.1%-2.4%)    | 2.7<br>(1.6-4.0)    | 93.7%<br>(28.5%-198.4%)  |
| <b>Viet Nam</b>                   | 1487.3<br>(1284.3-1694.0) | 11.2%<br>(6.5%-16.9%)   | 139.5<br>(120.8-159.6) | 7.6%<br>(2.9%-13.0%)     | 0.3<br>(0.2-0.3) | 55.3%<br>(4.3%-119.9%)  | 7.7<br>(3.5-13.6) | -4.4%<br>(-11.5%-4.4%)    | 3.9<br>(2.8-5.1)    | 51.1%<br>(-2.6%-124.6%)  |
| <b>Central Sub-Saharan Africa</b> | 1073.5<br>(924.1-1224.6)  | -0.6%<br>(-3.9%-2.8%)   | 111.4<br>(96.6-127.6)  | 0.1%<br>(-3.1%-3.5%)     | 2.2<br>(1.1-3.5) | -6.9%<br>(-33.8%-57.9%) | 6.3<br>(3.0-11.4) | -6.0%<br>(-11.3%--0.3%)   | 36.8<br>(18.9-58.6) | -6.6%<br>(-34.8%-57.1%)  |
| <b>Angola</b>                     | 1209.7<br>(1044.2-1381.0) | 6.4%<br>(1.4%-11.3%)    | 119.7<br>(103.4-137.7) | 4.7%<br>(-0.3%-9.1%)     | 1.6<br>(0.8-2.2) | 52.5%<br>(4.6%-124.9%)  | 7.0<br>(3.3-12.6) | -4.1%<br>(-11.7%-3.8%)    | 26.6<br>(14.6-36.6) | 44.0%<br>(-2.6%-120.2%)  |
| <b>Central African Republic</b>   | 1116.2<br>(963.6-1283.6)  | 1.3%<br>(-3.1%-6.8%)    | 118.3<br>(102.7-135.3) | 3.0%<br>(-1.5%-8.0%)     | 1.3<br>(0.6-2.0) | 3.6%<br>(-24.3%-43.1%)  | 7.1<br>(3.4-12.8) | 1.5%<br>(-7.3%-9.9%)      | 22.2<br>(11.8-34.6) | 1.6%<br>(-27.6%-42.5%)   |

|                                         |                           |                        |                       |                        |                  |                          |                   |                          |                     |                          |
|-----------------------------------------|---------------------------|------------------------|-----------------------|------------------------|------------------|--------------------------|-------------------|--------------------------|---------------------|--------------------------|
| <b>Congo</b>                            | 1132.7<br>(973.4-1301.4)  | -5.7%<br>(-9.8%--1.4%) | 113.8<br>(98.4-131.2) | -4.1%<br>(-8.1%-0.2%)  | 2.6<br>(1.5-3.6) | 27.6%<br>(-9.7%-86.9%)   | 6.5<br>(3.0-11.7) | -12.5%<br>(-19.7%--5.2%) | 41.5<br>(25.5-58.2) | 21.3%<br>(-17.6%-79.9%)  |
| <b>Democratic Republic of the Congo</b> | 1021.9<br>(880.5-1163.8)  | -2.7%<br>(-7.1%-2.1%)  | 108.2<br>(93.5-124.4) | -1.5%<br>(-5.8%-3.3%)  | 2.3<br>(1.0-4.0) | -18.0%<br>(-43.9%-47.9%) | 6.0<br>(2.9-10.7) | -6.3%<br>(-13.4%-1.4%)   | 39.8<br>(17.8-69.1) | -15.1%<br>(-43.3%-50.0%) |
| <b>Equatorial Guinea</b>                | 1186.9<br>(1025.7-1355.1) | 6.0%<br>(0.1%-11.9%)   | 109.9<br>(94.9-126.2) | -5.1%<br>(-10.1%-0.1%) | 2.9<br>(1.2-4.7) | 142.6%<br>(39.0%-364.1%) | 6.4<br>(3.0-11.3) | -11.2%<br>(-19.0%--2.6%) | 43.6<br>(18.7-73.8) | 110.3%<br>(16.2%-302.1%) |
| <b>Gabon</b>                            | 1175.2<br>(1014.8-1343.9) | 0.9%<br>(-3.3%-5.8%)   | 110.8<br>(95.5-127.8) | 2.7%<br>(-1.4%-7.7%)   | 3.1<br>(1.7-4.3) | 53.1%<br>(7.4%-136.6%)   | 6.4<br>(3.0-11.6) | -7.2%<br>(-14.0%-1.0%)   | 50.8<br>(29.9-72.5) | 45.9%<br>(-2.2%-131.6%)  |
| <b>Eastern Sub-Saharan Africa</b>       | 939.1<br>(813.8-1076.6)   | 2.4%<br>(1.2%-3.8%)    | 97.8<br>(84.4-111.9)  | 2.0%<br>(0.8%-3.4%)    | 1.4<br>(0.7-1.9) | 40.7%<br>(8.9%-77.3%)    | 5.4<br>(2.5-9.6)  | -4.7%<br>(-7.3%--1.5%)   | 22.2<br>(12.0-29.5) | 35.9%<br>(2.1%-73.0%)    |
| <b>Burundi</b>                          | 918.5<br>(800.2-1050.9)   | -2.5%<br>(-7.5%-2.4%)  | 98.3<br>(84.9-112.4)  | -1.5%<br>(-6.4%-3.3%)  | 1.1<br>(0.5-1.6) | -2.5%<br>(-35.8%-44.8%)  | 5.5<br>(2.5-9.7)  | -8.3%<br>(-16.1%--0.2%)  | 17.1<br>(8.6-25.6)  | -6.4%<br>(-40.9%-40.4%)  |
| <b>Comoros</b>                          | 945.2<br>(815.7-1088.5)   | 0.1%<br>(-4.3%-4.5%)   | 98.8<br>(85.1-114.1)  | 1.5%<br>(-2.8%-5.9%)   | 1.3<br>(0.6-1.9) | 18.2%<br>(-20.1%-74.0%)  | 5.4<br>(2.6-9.6)  | -8.5%<br>(-15.2%--0.8%)  | 19.7<br>(9.2-29.9)  | 13.3%<br>(-27.7%-76.9%)  |
| <b>Djibouti</b>                         | 980.0                     | 2.4%<br>(-1.8%-6.8%)   | 99.4<br>(86.0-113.6)  | 3.6%<br>(-0.7%-7.9%)   | 1.7<br>(0.7-2.6) | 40.4%                    | 5.5<br>(2.6-10.0) | -5.8%                    | 27.1<br>(12.7-41.1) | 35.5%                    |

|                   |                          |                       |                       |                       |                  |                         |                   |                          |                     |                          |
|-------------------|--------------------------|-----------------------|-----------------------|-----------------------|------------------|-------------------------|-------------------|--------------------------|---------------------|--------------------------|
|                   | (846.8-1120.9)           |                       |                       |                       |                  | (-2.3%-105.6%)          |                   | (-13.0%-2.5%)            |                     | (-8.7%-102.5%)           |
| <b>Eritrea</b>    | 910.5<br>(787.3-1040.7)  | -0.5%<br>(-5.2%-4.2%) | 95.8<br>(82.6-109.2)  | -1.0%<br>(-5.5%-3.6%) | 1.2<br>(0.5-1.9) | 56.2%<br>(-0.4%-158.5%) | 5.4<br>(2.5-9.8)  | -9.8%<br>(-17.5%--0.8%)  | 18.8<br>(8.4-29.0)  | 42.3%<br>(-7.3%-126.6%)  |
| <b>Ethiopia</b>   | 807.2<br>(699.6-926.8)   | -1.3%<br>(-3.4%-0.9%) | 85.5<br>(73.6-98.0)   | -1.3%<br>(-3.4%-0.8%) | 1.3<br>(0.7-1.9) | 49.4%<br>(-6.2%-125.7%) | 4.6<br>(2.2-8.3)  | -10.9%<br>(-15.2%--5.9%) | 20.4<br>(11.2-29.3) | 35.8%<br>(-19.3%-111.3%) |
| <b>Kenya</b>      | 995.1<br>(860.7-1140.3)  | 1.8%<br>(0.9%-2.6%)   | 101.2<br>(87.7-115.7) | 1.0%<br>(0.1%-1.9%)   | 1.3<br>(0.6-1.8) | 59.9%<br>(23.2%-103.9%) | 5.6<br>(2.6-10.1) | -2.2%<br>(-4.0%-0.3%)    | 20.0<br>(10.4-27.1) | 57.1%<br>(22.4%-103.6%)  |
| <b>Madagascar</b> | 915.9<br>(792.6-1053.2)  | 2.4%<br>(-1.8%-6.8%)  | 96.6<br>(83.4-110.9)  | 3.2%<br>(-1.1%-7.6%)  | 1.6<br>(0.7-2.4) | 23.0%<br>(-16.3%-74.4%) | 5.4<br>(2.6-9.5)  | -2.4%<br>(-9.5%-5.3%)    | 26.5<br>(13.1-39.3) | 23.7%<br>(-18.7%-82.5%)  |
| <b>Malawi</b>     | 1030.7<br>(891.5-1183.5) | -2.9%<br>(-7.0%-1.3%) | 108.3<br>(93.5-123.5) | -3.0%<br>(-7.3%-0.9%) | 1.2<br>(0.5-1.7) | 34.8%<br>(-3.4%-89.8%)  | 6.0<br>(2.8-10.7) | -8.1%<br>(-15.8%--1.0%)  | 18.1<br>(9.0-26.2)  | 37.1%<br>(-3.6%-95.3%)   |
| <b>Mozambique</b> | 1058.9<br>(916.1-1215.9) | 6.5%<br>(1.8%-11.5%)  | 110.7<br>(95.7-126.2) | 4.1%<br>(0.1%-8.6%)   | 1.7<br>(0.8-2.4) | 69.8%<br>(22.0%-151.7%) | 6.2<br>(2.9-11.1) | -2.0%<br>(-9.0%-7.0%)    | 27.3<br>(14.1-39.0) | 74.3%<br>(24.0%-162.2%)  |
| <b>Rwanda</b>     | 1017.1<br>(875.3-1171.1) | 0.6%<br>(-3.6%-5.4%)  | 105.7<br>(90.9-121.6) | -0.3%<br>(-4.4%-4.9%) | 1.2<br>(0.5-1.9) | 15.0%<br>(-28.2%-70.3%) | 5.7<br>(2.7-10.5) | -10.9%<br>(-18.3%--2.6%) | 17.8<br>(7.5-28.3)  | 6.4%<br>(-35.7%-59.8%)   |
| <b>Somalia</b>    | 974.1<br>(839.7-1114.9)  | 5.4%<br>(0.7%-10.8%)  | 106.1<br>(91.8-121.3) | 5.9%<br>(1.6%-11.1%)  | 0.8<br>(0.3-1.4) | -2.2%<br>(-34.8%-40.4%) | 6.1<br>(2.8-10.8) | 2.6%<br>(-5.7%-11.2%)    | 12.5<br>(4.9-22.2)  | -5.9%<br>(-37.8%-35.5%)  |

|                                    |                           |                           |                        |                          |                  |                         |                   |                           |                     |                          |
|------------------------------------|---------------------------|---------------------------|------------------------|--------------------------|------------------|-------------------------|-------------------|---------------------------|---------------------|--------------------------|
| <b>South Sudan</b>                 | 963.5<br>(835.2-1097.5)   | 8.3%<br>(3.7%-12.8%)      | 94.5<br>(81.9-108.7)   | 10.1%<br>(5.4%-14.8%)    | 1.4<br>(0.6-2.1) | 11.1%<br>(-23.1%-60.4%) | 5.8<br>(2.7-10.3) | 5.2%<br>(-2.5%-13.8%)     | 21.9<br>(10.0-33.9) | 4.3%<br>(-30.7%-58.4%)   |
| <b>Uganda</b>                      | 933.8<br>(804.9-1072.6)   | 3.8%<br>(-0.7%-8.4%)      | 97.5<br>(83.7-111.9)   | 2.2%<br>(-2.6%-7.2%)     | 1.3<br>(0.5-2.0) | 44.7%<br>(2.4%-116.7%)  | 5.3<br>(2.5-9.5)  | -3.0%<br>(-10.5%-5.9%)    | 21.2<br>(8.0-32.5)  | 40.9%<br>(-0.7%-114.6%)  |
| <b>United Republic of Tanzania</b> | 1015.9<br>(874.6-1162.2)  | 9.6%<br>(5.0%-14.5%)      | 104.1<br>(90.8-119.6)  | 7.8%<br>(3.2%-12.6%)     | 1.7<br>(0.6-2.7) | 39.0%<br>(-9.0%-101.0%) | 5.8<br>(2.7-10.2) | 3.6%<br>(-4.5%-12.9%)     | 26.9<br>(10.3-42.3) | 35.9%<br>(-13.7%-104.5%) |
| <b>Zambia</b>                      | 974.6<br>(833.0-1115.7)   | 1.0%<br>(-3.4%-5.6%)      | 99.8<br>(85.7-114.3)   | 0.2%<br>(-4.1%-4.5%)     | 1.9<br>(1.1-2.9) | 85.1%<br>(22.2%-181.1%) | 5.5<br>(2.6-9.9)  | -8.8%<br>(-16.4%-0.0%)    | 30.0<br>(18.9-46.6) | 90.0%<br>(23.8%-186.4%)  |
| <b>Southern Sub-Saharan Africa</b> | 1307.5<br>(1135.5-1490.7) | -13.5%<br>(-14.9%--12.0%) | 126.2<br>(109.5-144.8) | -11.4%<br>(-12.9%--9.8%) | 2.0<br>(1.6-2.2) | 49.8%<br>(27.5%-70.6%)  | 7.0<br>(3.3-12.5) | -18.4%<br>(-20.8%--15.5%) | 34.8<br>(27.5-39.7) | 44.3%<br>(21.2%-67.0%)   |
| <b>Botswana</b>                    | 1302.6<br>(1127.5-1502.0) | 1.2%<br>(-3.6%-6.3%)      | 123.5<br>(106.5-142.5) | -1.5%<br>(-5.6%-3.2%)    | 1.3<br>(0.8-1.8) | 53.9%<br>(4.6%-124.3%)  | 6.6<br>(3.1-11.7) | -9.5%<br>(-17.0%--1.5%)   | 24.7<br>(15.7-35.5) | 46.9%<br>(-3.4%-124.9%)  |
| <b>Eswatini</b>                    | 1381.0<br>(1183.2-1590.2) | 3.0%<br>(-1.7%-7.9%)      | 133.6<br>(115.6-154.3) | 2.4%<br>(-2.0%-7.4%)     | 1.1<br>(0.7-1.6) | 62.7%<br>(11.3%-134.7%) | 7.7<br>(3.6-13.7) | -3.2%<br>(-10.6%-4.9%)    | 20.2<br>(13.5-29.4) | 54.9%<br>(3.2%-128.1%)   |
| <b>Lesotho</b>                     | 1326.7                    | 9.3%                      | 134.2<br>(116.0-153.6) | 7.8%                     | 0.9<br>(0.6-1.3) | 91.4%                   | 7.6<br>(3.5-13.9) | 5.5%                      | 17.3<br>(11.2-24.4) | 78.3%                    |

|                                   |                           |                           |                        |                           |                  |                          |                   |                           |                     |                          |
|-----------------------------------|---------------------------|---------------------------|------------------------|---------------------------|------------------|--------------------------|-------------------|---------------------------|---------------------|--------------------------|
|                                   | (1145.7-1519.8)           | (3.9%-14.8%)              |                        | (2.9%-12.6%)              |                  | (33.8%-178.5%)           |                   | (-2.8%-14.5%)             |                     | (20.0%-169.5%)           |
| <b>Namibia</b>                    | 1225.3<br>(1061.5-1400.9) | -5.2%<br>(-9.7%--0.5%)    | 118.9<br>(103.0-137.2) | -5.3%<br>(-9.5%--0.5%)    | 1.3<br>(0.8-1.8) | 43.8%<br>(1.6%-103.5%)   | 6.5<br>(3.0-11.6) | -16.2%<br>(-22.9%--8.8%)  | 23.8<br>(15.4-33.7) | 32.6%<br>(-12.3%-94.8%)  |
| <b>South Africa</b>               | 1311.6<br>(1139.3-1497.0) | -18.0%<br>(-19.7%--16.3%) | 125.4<br>(108.8-143.8) | -16.0%<br>(-17.9%--14.3%) | 2.3<br>(1.8-2.6) | 45.2%<br>(22.7%-66.0%)   | 6.9<br>(3.3-12.5) | -23.0%<br>(-25.7%--19.9%) | 40.9<br>(32.5-46.7) | 38.6%<br>(15.5%-61.1%)   |
| <b>Zimbabwe</b>                   | 1279.2<br>(1108.2-1477.1) | 7.9%<br>(2.2%-13.1%)      | 131.7<br>(114.5-152.4) | 10.6%<br>(5.2%-15.7%)     | 0.1<br>(0.1-0.1) | 14.9%<br>(-13.5%-54.1%)  | 7.3<br>(3.5-13.0) | 9.5%<br>(1.1%-17.9%)      | 1.6<br>(1.0-2.1)    | 13.2%<br>(-15.0%-51.9%)  |
| <b>Western Sub-Saharan Africa</b> | 902.7<br>(783.4-1036.4)   | 4.3%<br>(3.5%-5.1%)       | 93.5<br>(81.0-107.2)   | 4.3%<br>(3.5%-5.0%)       | 0.3<br>(0.2-0.4) | 38.3%<br>(-8.9%-94.0%)   | 5.1<br>(2.4-9.2)  | -2.5%<br>(-4.6%-0.0%)     | 5.4<br>(2.9-7.3)    | 33.3%<br>(-13.6%-89.7%)  |
| <b>Benin</b>                      | 963.4<br>(839.0-1108.9)   | 2.4%<br>(-2.4%-7.3%)      | 100.4<br>(86.8-116.0)  | 2.1%<br>(-2.4%-7.2%)      | 0.3<br>(0.2-0.5) | 51.0%<br>(1.4%-125.0%)   | 5.6<br>(2.6-10.0) | -3.0%<br>(-10.6%-4.9%)    | 5.4<br>(2.8-8.0)    | 36.8%<br>(-12.3%-112.4%) |
| <b>Burkina Faso</b>               | 878.8<br>(762.0-1011.5)   | 3.2%<br>(-1.1%-8.0%)      | 93.1<br>(80.4-106.1)   | 2.4%<br>(-1.6%-7.0%)      | 0.4<br>(0.2-0.7) | 105.6%<br>(29.9%-209.5%) | 5.1<br>(2.4-9.1)  | -2.2%<br>(-9.3%-6.2%)     | 7.7<br>(3.6-13.0)   | 97.6%<br>(24.1%-215.0%)  |
| <b>Cabo Verde</b>                 | 1003.1<br>(864.9-1152.1)  | 4.3%<br>(0.0%-9.0%)       | 98.3<br>(84.4-113.3)   | 1.4%<br>(-3.1%-6.5%)      | 0.6<br>(0.3-0.8) | 96.1%<br>(32.1%-226.8%)  | 5.0<br>(2.3-9.2)  | -7.8%<br>(-15.4%-0.2%)    | 8.8<br>(4.7-12.3)   | 77.8%<br>(13.2%-205.3%)  |
| <b>Cameroon</b>                   | 908.4                     | 5.8%                      | 94.3<br>(81.9-108.5)   | 6.8%                      | 0.5<br>(0.3-0.7) | 67.6%                    | 5.1<br>(2.4-9.1)  | -1.6%<br>(-9.9%-7.0%)     | 7.5<br>(4.0-11.9)   | 55.2%                    |

|                      |                          |                      |                       |                      |                  |                          |                   |                        |                  |                          |
|----------------------|--------------------------|----------------------|-----------------------|----------------------|------------------|--------------------------|-------------------|------------------------|------------------|--------------------------|
|                      | (784.1-1043.2)           | (0.9%-10.6%)         |                       | (2.4%-11.7%)         |                  | (10.6%-150.8%)           |                   |                        |                  | (-5.6%-154.9%)           |
| <b>Chad</b>          | 853.8<br>(740.3-978.1)   | 3.4%<br>(-0.8%-7.7%) | 90.1<br>(77.9-103.0)  | 2.7%<br>(-1.8%-7.4%) | 0.3<br>(0.2-0.5) | 36.9%<br>(-5.3%-98.9%)   | 5.2<br>(2.4-9.1)  | 0.3%<br>(-7.3%-7.6%)   | 5.1<br>(2.5-8.0) | 29.4%<br>(-15.0%-95.0%)  |
| <b>Côte d'Ivoire</b> | 972.3<br>(836.3-1116.3)  | 2.6%<br>(-1.5%-7.4%) | 100.1<br>(86.9-114.7) | 4.0%<br>(-0.2%-8.8%) | 0.3<br>(0.2-0.5) | 32.7%<br>(-10.7%-102.1%) | 5.6<br>(2.7-9.9)  | -0.7%<br>(-7.8%-8.0%)  | 5.2<br>(3.0-8.1) | 26.1%<br>(-18.3%-106.7%) |
| <b>Gambia</b>        | 1002.5<br>(867.2-1152.0) | 1.7%<br>(-2.8%-6.7%) | 104.7<br>(91.0-119.9) | 3.1%<br>(-1.5%-8.0%) | 0.4<br>(0.2-0.6) | 73.7%<br>(11.8%-164.3%)  | 5.7<br>(2.7-10.3) | -3.6%<br>(-10.8%-4.0%) | 6.2<br>(3.1-9.5) | 66.8%<br>(2.5%-168.2%)   |
| <b>Ghana</b>         | 950.8<br>(822.6-1098.0)  | 4.0%<br>(-0.6%-8.6%) | 97.6<br>(84.9-112.3)  | 2.4%<br>(-1.9%-6.6%) | 0.1<br>(0.1-0.2) | 4.1%<br>(-30.0%-56.7%)   | 5.2<br>(2.4-9.3)  | -3.9%<br>(-11.8%-4.8%) | 1.9<br>(1.4-3.0) | -11.6%<br>(-46.8%-49.1%) |
| <b>Guinea</b>        | 849.8<br>(734.7-973.8)   | 3.9%<br>(-0.6%-8.5%) | 90.2<br>(77.8-103.0)  | 4.2%<br>(-0.3%-8.7%) | 0.3<br>(0.2-0.5) | 42.0%<br>(-4.9%-121.4%)  | 5.1<br>(2.4-9.0)  | -1.2%<br>(-8.4%-6.5%)  | 5.4<br>(2.6-9.1) | 33.4%<br>(-15.1%-126.7%) |
| <b>Guinea-Bissau</b> | 931.4<br>(804.6-1067.6)  | 1.1%<br>(-3.3%-6.2%) | 98.8<br>(85.5-112.7)  | 1.6%<br>(-3.0%-5.7%) | 0.4<br>(0.2-0.6) | 52.1%<br>(-8.7%-141.1%)  | 5.6<br>(2.7-10.0) | -4.6%<br>(-11.9%-3.3%) | 5.9<br>(3.1-9.8) | 42.1%<br>(-16.5%-137.5%) |
| <b>Liberia</b>       | 972.9<br>(839.0-1115.6)  | 1.7%<br>(-2.8%-6.6%) | 103.6<br>(89.4-119.5) | 3.3%<br>(-0.8%-8.0%) | 0.3<br>(0.2-0.5) | 36.6%<br>(-6.1%-102.1%)  | 5.5<br>(2.6-9.9)  | -6.2%<br>(-13.2%-2.2%) | 5.2<br>(2.7-8.6) | 27.8%<br>(-16.3%-98.8%)  |
| <b>Mali</b>          | 879.2<br>(762.3-1003.9)  | 4.6%<br>(-0.1%-9.4%) | 93.1<br>(80.3-106.9)  | 4.2%<br>(-0.2%-8.6%) | 0.3<br>(0.2-0.5) | 50.1%<br>(2.0%-124.1%)   | 5.1<br>(2.4-9.2)  | -2.4%<br>(-9.4%-5.4%)  | 5.2<br>(2.7-8.6) | 41.9%<br>(-11.3%-133.0%) |

|                              |                         |                       |                       |                       |                  |                          |                   |                         |                   |                          |
|------------------------------|-------------------------|-----------------------|-----------------------|-----------------------|------------------|--------------------------|-------------------|-------------------------|-------------------|--------------------------|
| <b>Mauritania</b>            | 920.1<br>(796.3-1051.7) | 3.3%<br>(-0.7%-7.5%)  | 95.0<br>(82.3-109.2)  | 3.7%<br>(-0.3%-8.0%)  | 0.4<br>(0.2-0.6) | 25.4%<br>(-18.8%-91.8%)  | 5.1<br>(2.4-9.1)  | -6.8%<br>(-13.9%-1.1%)  | 6.3<br>(2.8-10.2) | 14.6%<br>(-30.9%-85.1%)  |
| <b>Niger</b>                 | 861.0<br>(746.2-974.6)  | 4.6%<br>(0.3%-9.1%)   | 92.3<br>(79.4-105.4)  | 5.8%<br>(1.3%-10.0%)  | 0.3<br>(0.1-0.5) | 32.6%<br>(-12.5%-97.1%)  | 5.1<br>(2.4-9.2)  | -2.7%<br>(-10.1%-5.0%)  | 4.6<br>(2.2-8.3)  | 27.1%<br>(-19.9%-104.8%) |
| <b>Nigeria</b>               | 882.1<br>(764.1-1009.6) | 5.0%<br>(4.0%-6.0%)   | 90.3<br>(78.1-103.7)  | 4.7%<br>(3.7%-5.7%)   | 0.4<br>(0.2-0.5) | 32.9%<br>(-27.9%-117.3%) | 4.9<br>(2.3-8.8)  | -2.4%<br>(-4.5%--0.1%)  | 5.6<br>(2.8-8.3)  | 30.8%<br>(-32.1%-120.0%) |
| <b>Sao Tome and Principe</b> | 960.1<br>(828.5-1104.4) | 3.2%<br>(-0.9%-7.7%)  | 98.5<br>(84.9-113.4)  | 3.4%<br>(-0.9%-8.0%)  | 0.4<br>(0.2-0.6) | 84.8%<br>(25.6%-174.9%)  | 5.2<br>(2.4-9.1)  | -6.8%<br>(-14.1%-0.6%)  | 7.0<br>(3.7-10.4) | 77.6%<br>(17.3%-180.1%)  |
| <b>Senegal</b>               | 950.3<br>(822.0-1089.4) | -0.9%<br>(-4.9%-3.6%) | 98.7<br>(85.1-112.8)  | -0.2%<br>(-4.2%-4.2%) | 0.4<br>(0.2-0.5) | 41.6%<br>(-2.9%-109.1%)  | 5.4<br>(2.5-9.8)  | -6.9%<br>(-13.8%-0.5%)  | 6.1<br>(3.0-9.3)  | 35.0%<br>(-11.7%-115.2%) |
| <b>Sierra Leone</b>          | 999.0<br>(866.8-1153.8) | -4.1%<br>(-8.3%-0.4%) | 105.3<br>(91.5-120.8) | -2.8%<br>(-6.9%-1.6%) | 0.3<br>(0.1-0.4) | 39.3%<br>(-9.8%-105.0%)  | 5.8<br>(2.7-10.5) | -9.9%<br>(-16.5%--3.0%) | 4.5<br>(2.3-7.5)  | 34.6%<br>(-15.0%-115.4%) |
| <b>Togo</b>                  | 958.8<br>(829.1-1103.5) | 3.0%<br>(-1.7%-7.6%)  | 100.9<br>(87.3-116.7) | 3.8%<br>(-0.6%-8.2%)  | 0.4<br>(0.2-0.6) | 45.4%<br>(-4.0%-113.9%)  | 5.4<br>(2.6-9.8)  | -2.0%<br>(-9.7%-6.1%)   | 6.5<br>(3.1-10.4) | 37.6%<br>(-13.3%-117.8%) |

Data in parentheses are 95% uncertainty intervals.

SDI, socio-demographic index; YLDs, years lived with disability; YLLs, years of life lost.
