# Supplementary material for: Burden of Peripheral Artery Disease and Its Attributable Risk Factors in 204 Countries and Territories From 1990 to 2019
Source: PubMed Central journal article supplement (PMC9039520; doi:10.3389/fcvm.2022.868370), 2022-04-12
Supplement: Table_4.pdf [file Table_4.pdf]

**Table S4. Percentage contribution of major risk factors to peripheral artery disease age-standardized deaths by SDI quintile and GBD region, 1990-2019**

|                                  | 1990 PAF             |                       | 2019 PAF             |                       | Percentage change in PAF, 1990-2019 |                           |
|----------------------------------|----------------------|-----------------------|----------------------|-----------------------|-------------------------------------|---------------------------|
|                                  | Females              | Males                 | Females              | Males                 | Females                             | Males                     |
| <b>Diet high in sodium</b>       |                      |                       |                      |                       |                                     |                           |
| <b>Global</b>                    | 2.0%<br>(0.4%-6.1%)  | 3.4%<br>(0.8%-8.4%)   | 1.9%<br>(0.3%-6.1%)  | 3.3%<br>(0.7%-8.5%)   | -4.3%<br>(-26.7%-5.2%)              | -1.7%<br>(-23.6%-7.6%)    |
| <b>High SDI</b>                  | 1.6%<br>(0.3%-5.5%)  | 2.5%<br>(0.4%-7.2%)   | 1.6%<br>(0.3%-5.5%)  | 2.7%<br>(0.4%-7.8%)   | -3.9%<br>(-23.6%-10.2%)             | 10.5%<br>(-15.6%-33.8%)   |
| <b>High-middle SDI</b>           | 2.3%<br>(0.5%-6.5%)  | 4.4%<br>(1.3%-9.7%)   | 2.1%<br>(0.4%-6.4%)  | 4.0%<br>(1.0%-9.2%)   | -7.5%<br>(-31.2%-7.7%)              | -8.2%<br>(-29.5%-2.3%)    |
| <b>Middle SDI</b>                | 3.0%<br>(0.5%-8.0%)  | 4.1%<br>(1.0%-9.6%)   | 2.5%<br>(0.4%-7.4%)  | 4.0%<br>(1.0%-9.4%)   | -16.5%<br>(-45.6%--4.3%)            | -2.3%<br>(-20.6%-15.2%)   |
| <b>Low-middle SDI</b>            | 2.8%<br>(0.4%-7.9%)  | 3.3%<br>(0.6%-8.6%)   | 2.5%<br>(0.3%-7.5%)  | 3.2%<br>(0.5%-8.4%)   | -11.3%<br>(-38.2%--1.5%)            | -4.1%<br>(-26.5%-8.4%)    |
| <b>Low SDI</b>                   | 3.5%<br>(0.3%-10.0%) | 3.7%<br>(0.5%-10.2%)  | 3.0%<br>(0.3%-9.2%)  | 3.3%<br>(0.3%-9.6%)   | -13.1%<br>(-43.2%--0.9%)            | -11.9%<br>(-53.5%-8.1%)   |
| <b>Central Asia</b>              | 3.9%<br>(0.6%-9.8%)  | 5.9%<br>(1.5%-12.3%)  | 2.6%<br>(0.3%-7.9%)  | 4.1%<br>(0.6%-10.0%)  | -33.3%<br>(-71.7%--16.8%)           | -30.9%<br>(-66.3%--15.7%) |
| <b>Central Europe</b>            | 7.8%<br>(2.5%-15.0%) | 12.6%<br>(6.1%-20.2%) | 5.6%<br>(1.1%-12.4%) | 10.4%<br>(4.2%-17.8%) | -27.8%<br>(-65.2%--12.3%)           | -17.6%<br>(-40.0%--7.0%)  |
| <b>Eastern Europe</b>            | 1.6%<br>(0.2%-5.6%)  | 3.2%<br>(0.4%-8.8%)   | 1.6%<br>(0.2%-5.6%)  | 3.4%<br>(0.4%-8.9%)   | -1.6%<br>(-26.0%-27.5%)             | 5.6%<br>(-29.5%-64.2%)    |
| <b>Australasia</b>               | 0.8%<br>(0.2%-3.7%)  | 1.3%<br>(0.2%-4.9%)   | 0.8%<br>(0.2%-3.4%)  | 1.2%<br>(0.2%-4.6%)   | -1.6%<br>(-34.6%-44.9%)             | -4.7%<br>(-32.0%-28.9%)   |
| <b>High-income Asia Pacific</b>  | 5.4%<br>(1.1%-12.0%) | 7.6%<br>(2.3%-14.5%)  | 3.6%<br>(0.5%-9.4%)  | 5.1%<br>(1.0%-11.6%)  | -32.8%<br>(-63.6%--17.6%)           | -32.5%<br>(-63.3%--17.1%) |
| <b>High-income North America</b> | 1.6%<br>(0.2%-5.5%)  | 1.8%<br>(0.2%-6.2%)   | 1.6%<br>(0.2%-5.7%)  | 2.5%<br>(0.3%-7.4%)   | -1.2%<br>(-22.3%-28.2%)             | 42.8%<br>(9.9%-141.0%)    |

|                                     |                      |                      |                      |                      |                          |                          |
|-------------------------------------|----------------------|----------------------|----------------------|----------------------|--------------------------|--------------------------|
| <b>Southern Latin America</b>       | 2.6%<br>(0.3%-7.8%)  | 3.4%<br>(0.3%-9.3%)  | 2.5%<br>(0.2%-7.6%)  | 3.6%<br>(0.3%-9.5%)  | -5.9%<br>(-45.9%-14.6%)  | 4.5%<br>(-36.1%-48.2%)   |
| <b>Western Europe</b>               | 1.4%<br>(0.2%-5.2%)  | 2.4%<br>(0.3%-7.2%)  | 1.3%<br>(0.2%-4.7%)  | 2.3%<br>(0.3%-7.2%)  | -8.9%<br>(-23.6%-5.0%)   | -2.5%<br>(-20.7%-21.6%)  |
| <b>Andean Latin America</b>         | 2.4%<br>(0.2%-7.2%)  | 3.4%<br>(0.3%-9.1%)  | 2.3%<br>(0.2%-7.3%)  | 3.3%<br>(0.3%-8.9%)  | -3.8%<br>(-35.4%-28.4%)  | -1.8%<br>(-32.1%-51.1%)  |
| <b>Caribbean</b>                    | 1.8%<br>(0.2%-6.2%)  | 2.6%<br>(0.2%-7.8%)  | 1.5%<br>(0.2%-5.7%)  | 2.4%<br>(0.2%-7.6%)  | -13.9%<br>(-41.6%-3.8%)  | -6.2%<br>(-37.0%-20.3%)  |
| <b>Central Latin America</b>        | 2.1%<br>(0.2%-7.0%)  | 3.9%<br>(0.6%-9.6%)  | 2.2%<br>(0.2%-6.9%)  | 4.4%<br>(0.9%-10.4%) | 2.5%<br>(-17.2%-31.9%)   | 14.0%<br>(-6.1%-70.6%)   |
| <b>Tropical Latin America</b>       | 2.7%<br>(0.2%-7.9%)  | 3.9%<br>(0.3%-9.9%)  | 2.4%<br>(0.2%-7.4%)  | 3.7%<br>(0.4%-9.6%)  | -9.9%<br>(-42.2%-25.2%)  | -5.0%<br>(-40.1%-63.5%)  |
| <b>North Africa and Middle East</b> | 0.5%<br>(0.3%-1.5%)  | 0.9%<br>(0.2%-3.4%)  | 0.5%<br>(0.3%-1.6%)  | 0.9%<br>(0.3%-3.4%)  | -0.3%<br>(-28.2%-39.0%)  | 4.0%<br>(-23.3%-46.4%)   |
| <b>South Asia</b>                   | 2.0%<br>(0.2%-6.6%)  | 2.3%<br>(0.3%-7.3%)  | 1.8%<br>(0.2%-6.2%)  | 2.6%<br>(0.3%-7.7%)  | -6.0%<br>(-17.6%-13.0%)  | 12.0%<br>(1.7%-49.8%)    |
| <b>East Asia</b>                    | 5.9%<br>(1.7%-12.3%) | 8.2%<br>(3.2%-15.3%) | 5.1%<br>(1.2%-11.2%) | 7.5%<br>(2.8%-14.2%) | -13.9%<br>(-43.9%-5.9%)  | -8.7%<br>(-33.1%-15.2%)  |
| <b>Oceania</b>                      | 3.5%<br>(0.4%-9.0%)  | 4.7%<br>(0.8%-10.8%) | 3.3%<br>(0.3%-8.8%)  | 4.5%<br>(0.6%-10.5%) | -5.6%<br>(-49.7%-13.2%)  | -5.4%<br>(-44.0%-21.0%)  |
| <b>Southeast Asia</b>               | 4.7%<br>(0.7%-11.1%) | 7.9%<br>(2.5%-14.9%) | 3.8%<br>(0.4%-9.7%)  | 6.2%<br>(1.3%-12.7%) | -20.3%<br>(-57.5%--8.4%) | -22.4%<br>(-54.9%--9.1%) |
| <b>Central Sub-Saharan Africa</b>   | 1.3%<br>(0.2%-5.4%)  | 1.4%<br>(0.2%-5.6%)  | 1.3%<br>(0.2%-5.9%)  | 1.5%<br>(0.2%-6.3%)  | 3.7%<br>(-43.6%-42.2%)   | 10.5%<br>(-41.7%-68.8%)  |
| <b>Eastern Sub-Saharan Africa</b>   | 5.3%<br>(0.5%-13.7%) | 5.6%<br>(0.7%-13.9%) | 4.7%<br>(0.3%-12.7%) | 4.2%<br>(0.3%-11.7%) | -11.0%<br>(-45.4%--0.8%) | -25.4%<br>(-65.5%--8.7%) |
| <b>Southern Sub-Saharan Africa</b>  | 1.7%<br>(0.2%-6.9%)  | 1.8%<br>(0.2%-6.9%)  | 1.5%<br>(0.2%-6.2%)  | 1.4%<br>(0.2%-5.9%)  | -12.9%<br>(-41.7%-26.5%) | -24.0%<br>(-53.2%-41.4%) |

|                                    |                        |                        |                        |                        |                        |                        |
|------------------------------------|------------------------|------------------------|------------------------|------------------------|------------------------|------------------------|
| <b>Western Sub-Saharan Africa</b>  | 2.0%<br>(0.2%-7.7%)    | 2.1%<br>(0.2%-8.2%)    | 2.2%<br>(0.2%-8.3%)    | 2.3%<br>(0.2%-8.3%)    | 8.0%<br>(-16.8%-41.4%) | 6.4%<br>(-16.4%-42.2%) |
| <b>High fasting plasma glucose</b> |                        |                        |                        |                        |                        |                        |
| <b>Global</b>                      | 19.4%<br>(16.1%-22.9%) | 21.1%<br>(18.0%-24.4%) | 25.2%<br>(21.2%-29.3%) | 28.4%<br>(24.6%-32.3%) | 30.0%<br>(25.3%-36.9%) | 34.5%<br>(30.6%-40.0%) |
| <b>High SDI</b>                    | 21.4%<br>(17.9%-25.0%) | 23.3%<br>(19.8%-26.7%) | 28.4%<br>(24.2%-32.7%) | 32.7%<br>(28.7%-36.8%) | 32.8%<br>(26.7%-40.0%) | 40.6%<br>(35.9%-46.8%) |
| <b>High-middle SDI</b>             | 16.8%<br>(13.9%-20.0%) | 18.7%<br>(16.0%-21.5%) | 21.7%<br>(18.1%-25.5%) | 24.4%<br>(21.1%-28.0%) | 29.0%<br>(22.7%-35.6%) | 30.6%<br>(25.8%-37.1%) |
| <b>Middle SDI</b>                  | 23.8%<br>(19.7%-27.6%) | 24.7%<br>(20.6%-29.0%) | 27.1%<br>(23.0%-31.5%) | 28.8%<br>(24.8%-33.0%) | 13.9%<br>(8.0%-21.2%)  | 16.8%<br>(10.6%-24.1%) |
| <b>Low-middle SDI</b>              | 19.2%<br>(16.0%-22.7%) | 21.1%<br>(17.9%-24.5%) | 24.8%<br>(20.9%-28.6%) | 27.4%<br>(23.9%-31.4%) | 28.9%<br>(23.3%-35.4%) | 30.3%<br>(24.9%-36.5%) |
| <b>Low SDI</b>                     | 16.6%<br>(13.8%-19.5%) | 20.7%<br>(17.5%-23.8%) | 21.2%<br>(17.7%-25.4%) | 24.8%<br>(21.6%-28.4%) | 27.9%<br>(22.2%-36.0%) | 19.6%<br>(12.6%-26.6%) |
| <b>Central Asia</b>                | 14.7%<br>(12.1%-17.3%) | 14.1%<br>(12.2%-16.3%) | 23.7%<br>(19.8%-27.5%) | 23.8%<br>(20.8%-27.0%) | 61.2%<br>(51.7%-71.9%) | 68.8%<br>(60.0%-78.8%) |
| <b>Central Europe</b>              | 21.1%<br>(17.7%-24.6%) | 23.0%<br>(20.0%-26.2%) | 26.5%<br>(22.2%-30.8%) | 31.4%<br>(27.6%-35.1%) | 25.5%<br>(17.1%-32.8%) | 36.8%<br>(30.3%-43.5%) |
| <b>Eastern Europe</b>              | 12.8%<br>(10.6%-15.1%) | 13.7%<br>(11.8%-15.9%) | 16.3%<br>(13.5%-19.2%) | 18.0%<br>(15.6%-20.6%) | 27.7%<br>(23.3%-32.3%) | 30.9%<br>(25.6%-37.5%) |
| <b>Australasia</b>                 | 15.9%<br>(12.6%-19.3%) | 19.3%<br>(15.8%-23.0%) | 21.3%<br>(17.3%-25.6%) | 25.2%<br>(21.1%-29.6%) | 34.0%<br>(20.6%-49.7%) | 30.9%<br>(19.9%-45.2%) |
| <b>High-income Asia Pacific</b>    | 15.1%<br>(12.4%-18.1%) | 21.5%<br>(18.6%-24.7%) | 17.3%<br>(14.0%-20.9%) | 23.9%<br>(20.3%-27.7%) | 14.6%<br>(8.7%-21.6%)  | 11.0%<br>(6.2%-16.9%)  |
| <b>High-income North America</b>   | 22.1%<br>(18.8%-25.4%) | 25.4%<br>(22.0%-29.0%) | 29.5%<br>(25.4%-33.4%) | 36.0%<br>(31.7%-40.1%) | 33.7%<br>(29.4%-38.3%) | 41.3%<br>(35.5%-47.2%) |
| <b>Southern Latin America</b>      | 19.3%<br>(15.9%-22.7%) | 19.2%<br>(16.4%-22.0%) | 27.3%<br>(22.8%-31.6%) | 29.8%<br>(25.9%-33.9%) | 41.5%<br>(32.2%-52.8%) | 55.4%<br>(45.6%-68.6%) |

|                                     |                        |                        |                        |                        |                        |                        |
|-------------------------------------|------------------------|------------------------|------------------------|------------------------|------------------------|------------------------|
| <b>Western Europe</b>               | 21.9%<br>(18.0%-25.9%) | 22.6%<br>(19.1%-26.1%) | 28.1%<br>(23.4%-32.8%) | 30.9%<br>(26.8%-35.1%) | 28.6%<br>(20.4%-38.6%) | 36.7%<br>(31.4%-44.0%) |
| <b>Andean Latin America</b>         | 16.6%<br>(13.4%-20.0%) | 17.8%<br>(15.0%-20.9%) | 23.9%<br>(19.9%-28.0%) | 25.4%<br>(21.4%-29.4%) | 43.8%<br>(33.4%-58.1%) | 42.1%<br>(33.6%-51.4%) |
| <b>Caribbean</b>                    | 26.9%<br>(22.9%-30.9%) | 29.9%<br>(26.0%-34.0%) | 31.7%<br>(27.2%-36.1%) | 36.8%<br>(32.4%-41.2%) | 17.6%<br>(11.4%-23.7%) | 22.8%<br>(17.1%-29.6%) |
| <b>Central Latin America</b>        | 34.5%<br>(29.7%-39.2%) | 33.7%<br>(29.1%-38.2%) | 33.5%<br>(28.8%-38.5%) | 35.6%<br>(31.2%-40.1%) | -2.9%<br>(-6.8%-0.9%)  | 5.7%<br>(2.0%-9.5%)    |
| <b>Tropical Latin America</b>       | 23.5%<br>(20.1%-27.1%) | 25.9%<br>(22.6%-29.6%) | 25.9%<br>(22.1%-29.8%) | 28.4%<br>(24.6%-32.4%) | 10.1%<br>(6.1%-13.5%)  | 9.5%<br>(5.9%-14.0%)   |
| <b>North Africa and Middle East</b> | 20.4%<br>(16.9%-23.9%) | 20.5%<br>(17.7%-23.6%) | 28.4%<br>(23.6%-32.7%) | 30.0%<br>(26.3%-34.0%) | 39.2%<br>(29.2%-49.8%) | 46.2%<br>(36.1%-57.0%) |
| <b>South Asia</b>                   | 19.1%<br>(15.7%-22.5%) | 20.8%<br>(17.8%-24.2%) | 26.4%<br>(22.3%-30.8%) | 28.3%<br>(24.7%-32.3%) | 38.3%<br>(32.5%-45.1%) | 35.9%<br>(30.8%-41.8%) |
| <b>East Asia</b>                    | 18.8%<br>(15.8%-22.0%) | 18.7%<br>(15.9%-21.8%) | 19.2%<br>(16.3%-22.6%) | 21.3%<br>(18.3%-24.9%) | 2.1%<br>(-3.7%-7.6%)   | 13.9%<br>(7.9%-19.7%)  |
| <b>Oceania</b>                      | 22.5%<br>(18.4%-26.9%) | 27.8%<br>(23.9%-31.8%) | 33.4%<br>(28.4%-38.3%) | 34.4%<br>(30.4%-38.7%) | 48.5%<br>(37.9%-61.4%) | 23.7%<br>(13.6%-35.6%) |
| <b>Southeast Asia</b>               | 18.1%<br>(14.9%-21.5%) | 19.7%<br>(16.8%-22.8%) | 25.9%<br>(21.8%-30.1%) | 27.4%<br>(23.9%-31.1%) | 43.1%<br>(35.6%-52.5%) | 39.3%<br>(33.4%-46.0%) |
| <b>Central Sub-Saharan Africa</b>   | 17.9%<br>(14.9%-21.0%) | 24.5%<br>(21.0%-28.0%) | 22.0%<br>(18.6%-25.6%) | 30.2%<br>(26.5%-34.1%) | 23.2%<br>(16.4%-31.3%) | 23.3%<br>(16.2%-31.9%) |
| <b>Eastern Sub-Saharan Africa</b>   | 14.4%<br>(11.8%-17.1%) | 17.7%<br>(15.0%-20.5%) | 16.3%<br>(13.4%-19.2%) | 21.4%<br>(18.4%-24.7%) | 13.2%<br>(9.1%-17.7%)  | 20.8%<br>(15.5%-26.5%) |
| <b>Southern Sub-Saharan Africa</b>  | 23.6%<br>(20.0%-27.1%) | 21.7%<br>(19.0%-24.7%) | 29.5%<br>(25.6%-33.5%) | 29.4%<br>(26.0%-32.8%) | 24.9%<br>(19.8%-31.3%) | 35.1%<br>(29.3%-42.2%) |
| <b>Western Sub-Saharan Africa</b>   | 15.8%<br>(13.5%-18.3%) | 17.5%<br>(14.8%-20.5%) | 21.1%<br>(18.1%-24.1%) | 22.6%<br>(19.0%-26.4%) | 33.3%<br>(27.1%-39.6%) | 28.6%<br>(23.4%-34.0%) |
| <b>High systolic blood pressure</b> |                        |                        |                        |                        |                        |                        |

|                                  |                        |                        |                        |                        |                           |                           |
|----------------------------------|------------------------|------------------------|------------------------|------------------------|---------------------------|---------------------------|
| <b>Global</b>                    | 29.0%<br>(20.5%-39.4%) | 28.3%<br>(20.8%-36.8%) | 25.3%<br>(17.8%-35.2%) | 25.0%<br>(18.1%-33.0%) | -12.8%<br>(-18.4%--7.5%)  | -11.8%<br>(-16.3%--7.2%)  |
| <b>High SDI</b>                  | 29.8%<br>(21.2%-40.5%) | 29.2%<br>(21.5%-38.2%) | 24.7%<br>(17.1%-34.2%) | 23.7%<br>(17.0%-31.5%) | -17.4%<br>(-24.8%--9.5%)  | -19.0%<br>(-25.1%--13.4%) |
| <b>High-middle SDI</b>           | 29.7%<br>(21.5%-40.2%) | 29.9%<br>(22.7%-37.7%) | 26.3%<br>(18.8%-35.8%) | 27.1%<br>(20.2%-34.9%) | -11.3%<br>(-17.2%--5.9%)  | -9.2%<br>(-13.4%--5.4%)   |
| <b>Middle SDI</b>                | 23.8%<br>(16.8%-32.4%) | 23.4%<br>(17.1%-30.8%) | 25.4%<br>(17.9%-34.1%) | 25.4%<br>(19.0%-33.1%) | 6.9%<br>(-2.3%-16.9%)     | 8.5%<br>(2.2%-15.5%)      |
| <b>Low-middle SDI</b>            | 24.8%<br>(17.6%-33.4%) | 22.1%<br>(16.2%-28.9%) | 26.2%<br>(19.0%-35.1%) | 24.4%<br>(17.9%-31.9%) | 5.8%<br>(-0.5%-12.6%)     | 10.0%<br>(4.6%-15.3%)     |
| <b>Low SDI</b>                   | 24.2%<br>(18.2%-32.0%) | 23.0%<br>(17.2%-29.5%) | 25.2%<br>(18.5%-33.2%) | 25.9%<br>(19.6%-32.8%) | 4.1%<br>(-5.1%-13.6%)     | 12.7%<br>(0.3%-25.6%)     |
| <b>Central Asia</b>              | 27.0%<br>(19.6%-36.4%) | 27.2%<br>(21.0%-34.2%) | 27.7%<br>(19.6%-37.9%) | 27.0%<br>(20.6%-34.3%) | 2.3%<br>(-9.4%-15.7%)     | -1.0%<br>(-10.1%-8.6%)    |
| <b>Central Europe</b>            | 32.7%<br>(23.7%-42.7%) | 34.3%<br>(26.8%-42.4%) | 26.0%<br>(18.4%-35.2%) | 30.1%<br>(23.1%-37.8%) | -20.6%<br>(-29.7%--11.5%) | -12.2%<br>(-19.7%--6.1%)  |
| <b>Eastern Europe</b>            | 29.9%<br>(22.0%-39.8%) | 29.1%<br>(22.4%-36.3%) | 28.9%<br>(21.0%-38.6%) | 29.7%<br>(22.9%-37.1%) | -3.2%<br>(-10.7%-5.0%)    | 2.1%<br>(-3.4%-8.3%)      |
| <b>Australasia</b>               | 28.5%<br>(19.2%-39.7%) | 26.9%<br>(19.4%-36.1%) | 22.8%<br>(14.8%-32.7%) | 22.4%<br>(15.1%-30.9%) | -20.2%<br>(-36.1%--1.0%)  | -16.9%<br>(-28.2%--4.9%)  |
| <b>High-income Asia Pacific</b>  | 28.9%<br>(20.3%-39.7%) | 30.2%<br>(22.3%-38.8%) | 21.3%<br>(13.7%-30.7%) | 24.1%<br>(17.3%-32.1%) | -26.5%<br>(-37.5%--15.7%) | -20.2%<br>(-28.9%--12.3%) |
| <b>High-income North America</b> | 29.2%<br>(21.5%-38.7%) | 28.0%<br>(20.9%-36.3%) | 23.0%<br>(15.8%-31.7%) | 20.4%<br>(14.3%-27.8%) | -21.1%<br>(-32.9%--8.9%)  | -26.9%<br>(-36.3%--18.0%) |
| <b>Southern Latin America</b>    | 22.6%<br>(15.1%-31.7%) | 22.2%<br>(15.9%-29.3%) | 27.1%<br>(18.2%-37.7%) | 28.2%<br>(20.6%-37.1%) | 20.1%<br>(-2.8%-49.5%)    | 27.2%<br>(9.4%-49.4%)     |
| <b>Western Europe</b>            | 30.7%<br>(21.3%-42.0%) | 31.0%<br>(22.8%-40.4%) | 25.8%<br>(17.9%-36.5%) | 25.9%<br>(18.9%-34.6%) | -15.7%<br>(-23.7%--7.4%)  | -16.4%<br>(-22.4%--10.5%) |

|                                     |                        |                        |                        |                        |                         |                         |
|-------------------------------------|------------------------|------------------------|------------------------|------------------------|-------------------------|-------------------------|
| <b>Andean Latin America</b>         | 13.2%<br>(7.8%-20.3%)  | 14.1%<br>(9.3%-19.7%)  | 22.2%<br>(14.6%-31.6%) | 20.0%<br>(13.9%-27.1%) | 68.6%<br>(26.8%-137.6%) | 41.8%<br>(17.8%-76.2%)  |
| <b>Caribbean</b>                    | 22.8%<br>(16.0%-31.2%) | 22.3%<br>(16.2%-29.3%) | 22.3%<br>(15.6%-30.3%) | 23.5%<br>(17.1%-31.0%) | -2.1%<br>(-18.4%-16.6%) | 5.6%<br>(-7.7%-19.9%)   |
| <b>Central Latin America</b>        | 21.6%<br>(14.6%-29.9%) | 22.1%<br>(15.5%-30.0%) | 24.4%<br>(17.1%-33.5%) | 24.4%<br>(17.6%-32.5%) | 13.3%<br>(-5.9%-37.3%)  | 10.0%<br>(-3.2%-25.1%)  |
| <b>Tropical Latin America</b>       | 25.3%<br>(18.4%-33.6%) | 25.5%<br>(19.5%-32.2%) | 25.8%<br>(18.8%-34.3%) | 26.7%<br>(20.3%-34.1%) | 1.9%<br>(-6.7%-11.6%)   | 4.5%<br>(-1.7%-11.3%)   |
| <b>North Africa and Middle East</b> | 26.8%<br>(18.8%-36.2%) | 24.2%<br>(17.9%-31.3%) | 25.7%<br>(17.8%-35.0%) | 24.3%<br>(18.2%-31.4%) | -4.3%<br>(-17.0%-11.1%) | 0.6%<br>(-10.6%-13.7%)  |
| <b>South Asia</b>                   | 25.4%<br>(18.0%-34.4%) | 21.2%<br>(15.5%-27.9%) | 25.2%<br>(17.8%-34.1%) | 23.6%<br>(17.2%-30.9%) | -0.6%<br>(-6.9%-6.0%)   | 11.0%<br>(4.5%-17.7%)   |
| <b>East Asia</b>                    | 21.6%<br>(14.3%-30.7%) | 19.6%<br>(13.2%-27.1%) | 24.7%<br>(16.2%-35.0%) | 24.1%<br>(16.9%-33.0%) | 14.6%<br>(-15.5%-53.0%) | 23.4%<br>(-0.9%-54.3%)  |
| <b>Oceania</b>                      | 17.2%<br>(11.6%-24.6%) | 15.8%<br>(11.4%-21.0%) | 20.0%<br>(13.6%-28.7%) | 17.6%<br>(12.1%-23.8%) | 16.5%<br>(-6.2%-43.0%)  | 11.9%<br>(-6.4%-34.1%)  |
| <b>Southeast Asia</b>               | 28.7%<br>(20.6%-38.6%) | 27.7%<br>(21.2%-34.9%) | 29.2%<br>(20.6%-39.1%) | 29.3%<br>(22.4%-36.6%) | 1.7%<br>(-7.6%-10.5%)   | 5.9%<br>(-1.0%-12.6%)   |
| <b>Central Sub-Saharan Africa</b>   | 29.9%<br>(21.2%-39.9%) | 27.6%<br>(20.4%-35.4%) | 28.0%<br>(20.3%-36.4%) | 27.0%<br>(20.4%-34.7%) | -6.1%<br>(-20.7%-12.2%) | -2.0%<br>(-16.3%-14.9%) |
| <b>Eastern Sub-Saharan Africa</b>   | 22.0%<br>(15.8%-29.6%) | 19.5%<br>(14.2%-25.3%) | 25.0%<br>(17.8%-33.4%) | 26.1%<br>(19.4%-33.1%) | 13.9%<br>(1.8%-26.6%)   | 33.7%<br>(22.3%-48.3%)  |
| <b>Southern Sub-Saharan Africa</b>  | 30.4%<br>(21.9%-40.5%) | 30.6%<br>(23.6%-38.3%) | 31.4%<br>(23.0%-40.5%) | 30.5%<br>(23.7%-38.0%) | 3.2%<br>(-14.5%-24.6%)  | -0.2%<br>(-12.4%-13.5%) |
| <b>Western Sub-Saharan Africa</b>   | 26.0%<br>(19.5%-33.1%) | 22.9%<br>(16.8%-29.6%) | 31.7%<br>(24.5%-39.8%) | 28.8%<br>(21.2%-37.5%) | 21.8%<br>(6.8%-39.5%)   | 25.9%<br>(14.1%-40.1%)  |
| <b>Kidney dysfunction</b>           |                        |                        |                        |                        |                         |                         |
| <b>Global</b>                       | 10.4%<br>(5.4%-15.1%)  | 11.1%<br>(7.3%-14.7%)  | 11.7%<br>(6.1%-16.8%)  | 12.6%<br>(8.2%-16.7%)  | 12.6%<br>(5.8%-20.1%)   | 13.7%<br>(6.0%-19.0%)   |

|                                  |                       |                       |                       |                        |                         |                        |
|----------------------------------|-----------------------|-----------------------|-----------------------|------------------------|-------------------------|------------------------|
| <b>High SDI</b>                  | 11.9%<br>(6.3%-17.1%) | 11.9%<br>(7.5%-16.1%) | 13.4%<br>(7.4%-18.8%) | 12.9%<br>(8.0%-17.4%)  | 11.8%<br>(4.8%-21.9%)   | 8.3%<br>(1.7%-14.4%)   |
| <b>High-middle SDI</b>           | 8.9%<br>(5.0%-12.8%)  | 11.0%<br>(7.9%-14.0%) | 10.3%<br>(5.6%-14.8%) | 13.0%<br>(9.0%-16.7%)  | 15.9%<br>(4.9%-24.6%)   | 17.7%<br>(7.9%-25.9%)  |
| <b>Middle SDI</b>                | 10.7%<br>(6.9%-14.4%) | 11.0%<br>(7.7%-14.2%) | 13.2%<br>(8.1%-17.8%) | 14.1%<br>(10.0%-18.0%) | 23.0%<br>(10.4%-36.0%)  | 28.3%<br>(18.9%-38.4%) |
| <b>Low-middle SDI</b>            | 9.0%<br>(5.9%-12.4%)  | 9.8%<br>(7.1%-12.7%)  | 10.9%<br>(6.7%-14.8%) | 11.9%<br>(8.5%-15.2%)  | 20.5%<br>(7.4%-32.7%)   | 20.6%<br>(9.8%-29.3%)  |
| <b>Low SDI</b>                   | 7.7%<br>(5.1%-10.4%)  | 8.4%<br>(6.1%-10.9%)  | 9.1%<br>(6.1%-12.4%)  | 10.0%<br>(7.3%-12.7%)  | 18.2%<br>(3.4%-31.1%)   | 18.3%<br>(4.9%-32.6%)  |
| <b>Central Asia</b>              | 7.8%<br>(4.9%-11.0%)  | 11.2%<br>(8.5%-14.0%) | 9.1%<br>(5.3%-12.7%)  | 13.7%<br>(10.6%-16.7%) | 16.5%<br>(-3.2%-36.3%)  | 22.2%<br>(6.8%-38.5%)  |
| <b>Central Europe</b>            | 8.1%<br>(5.0%-11.2%)  | 10.8%<br>(8.2%-13.4%) | 10.8%<br>(6.2%-15.0%) | 13.8%<br>(10.3%-17.3%) | 32.7%<br>(13.5%-48.1%)  | 27.4%<br>(16.1%-37.9%) |
| <b>Eastern Europe</b>            | 8.5%<br>(5.0%-12.0%)  | 11.3%<br>(8.3%-14.3%) | 9.5%<br>(5.6%-13.3%)  | 14.5%<br>(11.1%-17.7%) | 12.2%<br>(3.7%-21.0%)   | 27.9%<br>(15.9%-40.3%) |
| <b>Australasia</b>               | 11.3%<br>(4.9%-17.2%) | 10.7%<br>(5.6%-15.3%) | 11.9%<br>(4.4%-18.6%) | 11.6%<br>(5.4%-16.9%)  | 5.0%<br>(-11.3%-14.6%)  | 8.8%<br>(-6.6%-18.5%)  |
| <b>High-income Asia Pacific</b>  | 10.8%<br>(4.5%-16.4%) | 13.7%<br>(8.9%-18.0%) | 11.1%<br>(4.3%-17.3%) | 14.0%<br>(8.2%-19.1%)  | 3.1%<br>(-12.8%-16.3%)  | 2.1%<br>(-12.6%-11.1%) |
| <b>High-income North America</b> | 14.5%<br>(9.0%-19.6%) | 14.4%<br>(9.8%-18.8%) | 15.4%<br>(9.6%-20.8%) | 14.5%<br>(9.4%-19.2%)  | 5.8%<br>(0.1%-10.8%)    | 1.0%<br>(-8.1%-6.7%)   |
| <b>Southern Latin America</b>    | 10.2%<br>(5.5%-14.6%) | 10.9%<br>(7.3%-14.3%) | 12.9%<br>(6.6%-18.6%) | 13.6%<br>(8.6%-18.4%)  | 26.3%<br>(10.3%-39.3%)  | 24.1%<br>(8.3%-35.6%)  |
| <b>Western Europe</b>            | 10.2%<br>(4.5%-15.3%) | 10.2%<br>(6.1%-14.0%) | 10.8%<br>(4.4%-16.5%) | 10.7%<br>(6.0%-15.0%)  | 6.5%<br>(-5.0%-12.8%)   | 5.3%<br>(-4.5%-12.0%)  |
| <b>Andean Latin America</b>      | 7.9%<br>(4.2%-11.2%)  | 8.8%<br>(6.1%-11.7%)  | 13.7%<br>(7.9%-19.1%) | 12.8%<br>(8.4%-17.1%)  | 73.6%<br>(41.9%-123.6%) | 46.0%<br>(13.1%-79.7%) |

|                                     |                       |                        |                        |                        |                          |                          |
|-------------------------------------|-----------------------|------------------------|------------------------|------------------------|--------------------------|--------------------------|
| <b>Caribbean</b>                    | 10.1%<br>(6.8%-13.3%) | 11.1%<br>(8.1%-14.1%)  | 13.7%<br>(9.2%-18.1%)  | 15.2%<br>(11.3%-18.9%) | 36.2%<br>(22.9%-50.2%)   | 36.9%<br>(26.1%-49.7%)   |
| <b>Central Latin America</b>        | 14.7%<br>(9.3%-19.8%) | 13.3%<br>(9.2%-17.1%)  | 18.1%<br>(11.4%-24.0%) | 17.8%<br>(12.5%-22.8%) | 23.5%<br>(12.1%-36.5%)   | 33.7%<br>(22.4%-45.6%)   |
| <b>Tropical Latin America</b>       | 11.2%<br>(7.6%-14.6%) | 12.8%<br>(9.7%-15.9%)  | 13.3%<br>(8.9%-17.3%)  | 14.4%<br>(10.6%-18.1%) | 19.5%<br>(9.7%-31.2%)    | 12.5%<br>(2.2%-23.9%)    |
| <b>North Africa and Middle East</b> | 12.2%<br>(7.0%-17.0%) | 13.4%<br>(9.6%-17.3%)  | 16.9%<br>(8.2%-24.1%)  | 19.9%<br>(13.8%-25.3%) | 39.1%<br>(4.4%-65.1%)    | 48.6%<br>(23.0%-72.4%)   |
| <b>South Asia</b>                   | 8.5%<br>(4.9%-12.3%)  | 10.7%<br>(7.6%-14.0%)  | 9.9%<br>(5.6%-14.0%)   | 11.5%<br>(7.9%-15.0%)  | 15.8%<br>(1.0%-32.2%)    | 7.7%<br>(-4.5%-19.2%)    |
| <b>East Asia</b>                    | 11.0%<br>(7.4%-14.5%) | 9.6%<br>(6.3%-12.8%)   | 11.0%<br>(6.7%-14.9%)  | 10.2%<br>(6.7%-13.6%)  | 0.4%<br>(-16.1%-13.3%)   | 7.3%<br>(-8.9%-20.2%)    |
| <b>Oceania</b>                      | 8.9%<br>(5.2%-13.0%)  | 13.2%<br>(9.5%-17.1%)  | 11.2%<br>(6.5%-15.4%)  | 15.0%<br>(10.4%-19.6%) | 24.9%<br>(3.6%-56.4%)    | 13.7%<br>(-7.5%-35.7%)   |
| <b>Southeast Asia</b>               | 9.4%<br>(5.7%-12.9%)  | 12.2%<br>(9.3%-15.2%)  | 12.2%<br>(7.0%-16.8%)  | 15.2%<br>(11.7%-18.7%) | 29.8%<br>(10.1%-49.5%)   | 24.2%<br>(13.1%-36.6%)   |
| <b>Central Sub-Saharan Africa</b>   | 6.7%<br>(4.1%-9.3%)   | 7.5%<br>(5.2%-10.0%)   | 8.2%<br>(5.3%-11.3%)   | 8.9%<br>(6.4%-11.6%)   | 22.3%<br>(-2.9%-54.4%)   | 19.3%<br>(-1.8%-47.9%)   |
| <b>Eastern Sub-Saharan Africa</b>   | 6.7%<br>(4.3%-9.4%)   | 8.2%<br>(6.0%-10.6%)   | 8.0%<br>(5.2%-10.8%)   | 9.3%<br>(6.9%-12.0%)   | 19.2%<br>(3.5%-35.2%)    | 14.5%<br>(3.5%-26.4%)    |
| <b>Southern Sub-Saharan Africa</b>  | 11.0%<br>(7.7%-14.2%) | 15.9%<br>(12.6%-19.7%) | 13.5%<br>(9.6%-17.4%)  | 18.4%<br>(14.6%-22.9%) | 23.3%<br>(7.8%-40.1%)    | 15.9%<br>(3.8%-26.6%)    |
| <b>Western Sub-Saharan Africa</b>   | 9.5%<br>(7.0%-12.1%)  | 6.9%<br>(4.8%-8.9%)    | 11.1%<br>(7.9%-14.1%)  | 8.4%<br>(5.6%-11.1%)   | 16.4%<br>(5.6%-25.6%)    | 22.4%<br>(7.1%-35.1%)    |
| <b>Lead exposure</b>                |                       |                        |                        |                        |                          |                          |
| <b>Global</b>                       | 0.7%<br>(0.2%-1.5%)   | 1.3%<br>(0.6%-2.2%)    | 0.8%<br>(0.3%-1.6%)    | 1.4%<br>(0.6%-2.4%)    | 12.4%<br>(2.6%-43.1%)    | 8.7%<br>(-2.2%-25.9%)    |
| <b>High SDI</b>                     | 0.7%<br>(0.2%-1.5%)   | 1.1%<br>(0.4%-2.0%)    | 0.6%<br>(0.1%-1.3%)    | 0.9%<br>(0.3%-1.8%)    | -20.2%<br>(-56.6%--8.8%) | -17.8%<br>(-38.3%--9.5%) |

|                                  |                     |                     |                     |                     |                            |                           |
|----------------------------------|---------------------|---------------------|---------------------|---------------------|----------------------------|---------------------------|
| <b>High-middle SDI</b>           | 0.5%<br>(0.1%-1.2%) | 1.0%<br>(0.3%-1.8%) | 0.6%<br>(0.2%-1.3%) | 1.0%<br>(0.4%-1.9%) | 16.7%<br>(3.3%-45.9%)      | 8.4%<br>(-2.0%-34.1%)     |
| <b>Middle SDI</b>                | 1.4%<br>(0.6%-2.3%) | 2.2%<br>(1.2%-3.2%) | 1.6%<br>(0.8%-2.6%) | 2.4%<br>(1.4%-3.7%) | 14.7%<br>(5.2%-32.7%)      | 12.2%<br>(5.2%-22.1%)     |
| <b>Low-middle SDI</b>            | 2.0%<br>(1.1%-3.2%) | 2.9%<br>(1.8%-4.2%) | 2.5%<br>(1.4%-3.8%) | 3.4%<br>(2.2%-4.9%) | 22.4%<br>(9.6%-40.2%)      | 18.3%<br>(7.3%-30.8%)     |
| <b>Low SDI</b>                   | 1.7%<br>(0.9%-2.8%) | 2.7%<br>(1.6%-4.0%) | 2.2%<br>(1.2%-3.5%) | 3.1%<br>(2.0%-4.5%) | 25.0%<br>(12.2%-45.7%)     | 14.1%<br>(2.0%-30.7%)     |
| <b>Central Asia</b>              | 0.7%<br>(0.1%-1.6%) | 1.4%<br>(0.6%-2.4%) | 0.9%<br>(0.2%-1.7%) | 1.4%<br>(0.6%-2.4%) | 16.0%<br>(2.3%-96.1%)      | 3.7%<br>(-7.0%-22.3%)     |
| <b>Central Europe</b>            | 0.5%<br>(0.0%-1.2%) | 1.1%<br>(0.3%-1.9%) | 0.6%<br>(0.0%-1.3%) | 1.2%<br>(0.4%-2.1%) | 16.2%<br>(4.0%-275.4%)     | 8.6%<br>(-1.2%-40.9%)     |
| <b>Eastern Europe</b>            | 0.2%<br>(0.0%-0.7%) | 0.4%<br>(0.0%-1.2%) | 0.2%<br>(0.0%-0.8%) | 0.5%<br>(0.0%-1.2%) | 10.1%<br>(-5.3%-495653.1%) | 12.1%<br>(0.5%-1046.7%)   |
| <b>Australasia</b>               | 1.2%<br>(0.5%-2.1%) | 1.6%<br>(0.8%-2.6%) | 1.1%<br>(0.4%-2.1%) | 1.5%<br>(0.7%-2.6%) | -4.8%<br>(-16.9%-5.3%)     | -2.2%<br>(-11.7%-7.5%)    |
| <b>High-income Asia Pacific</b>  | 0.5%<br>(0.0%-1.3%) | 0.9%<br>(0.2%-1.8%) | 0.4%<br>(0.0%-1.1%) | 0.7%<br>(0.1%-1.5%) | -15.7%<br>(-33.1%-9.2%)    | -25.0%<br>(-50.9%--12.1%) |
| <b>High-income North America</b> | 0.9%<br>(0.3%-1.8%) | 1.5%<br>(0.7%-2.5%) | 0.6%<br>(0.1%-1.4%) | 1.1%<br>(0.4%-2.0%) | -31.4%<br>(-69.9%--17.4%)  | -27.3%<br>(-48.9%--16.0%) |
| <b>Southern Latin America</b>    | 0.3%<br>(0.0%-1.0%) | 0.6%<br>(0.0%-1.3%) | 0.3%<br>(0.0%-1.0%) | 0.6%<br>(0.1%-1.3%) | 6.0%<br>(-5.6%-995.5%)     | 6.4%<br>(-9.4%-758.8%)    |
| <b>Western Europe</b>            | 0.6%<br>(0.1%-1.4%) | 1.1%<br>(0.4%-1.9%) | 0.6%<br>(0.1%-1.4%) | 1.0%<br>(0.3%-1.9%) | -3.6%<br>(-26.8%-13.7%)    | -7.3%<br>(-21.9%-1.1%)    |
| <b>Andean Latin America</b>      | 1.1%<br>(0.4%-2.0%) | 1.6%<br>(0.8%-2.6%) | 1.3%<br>(0.5%-2.2%) | 1.8%<br>(0.9%-2.9%) | 16.1%<br>(5.2%-40.7%)      | 11.6%<br>(-0.5%-28.4%)    |
| <b>Caribbean</b>                 | 1.3%<br>(0.6%-2.3%) | 2.4%<br>(1.4%-3.6%) | 1.4%<br>(0.7%-2.4%) | 2.5%<br>(1.5%-3.7%) | 7.8%<br>(-1.9%-26.7%)      | 3.0%<br>(-6.1%-12.5%)     |
| <b>Central Latin America</b>     | 1.8%<br>(0.9%-2.9%) | 2.8%<br>(1.7%-4.2%) | 1.8%<br>(1.0%-3.0%) | 2.9%<br>(1.7%-4.2%) | 4.9%<br>(-0.5%-11.7%)      | 1.1%<br>(-4.8%-7.0%)      |
| <b>Tropical Latin America</b>    | 1.2%<br>(0.4%-2.1%) | 1.8%<br>(1.0%-2.8%) | 1.2%<br>(0.4%-2.1%) | 1.7%<br>(0.8%-2.7%) | -0.4%<br>(-7.0%-10.0%)     | -9.2%<br>(-18.9%--2.4%)   |

|                                     |                        |                        |                        |                        |                           |                           |
|-------------------------------------|------------------------|------------------------|------------------------|------------------------|---------------------------|---------------------------|
| <b>North Africa and Middle East</b> | 1.3%<br>(0.5%-2.2%)    | 1.7%<br>(0.9%-2.7%)    | 1.4%<br>(0.6%-2.5%)    | 2.0%<br>(1.1%-3.1%)    | 11.5%<br>(-8.2%-42.4%)    | 19.1%<br>(4.5%-44.6%)     |
| <b>South Asia</b>                   | 2.8%<br>(1.7%-4.1%)    | 3.5%<br>(2.3%-4.9%)    | 3.4%<br>(2.1%-5.0%)    | 4.1%<br>(2.7%-5.8%)    | 21.6%<br>(11.1%-34.2%)    | 16.5%<br>(7.0%-27.7%)     |
| <b>East Asia</b>                    | 1.8%<br>(1.0%-2.8%)    | 2.6%<br>(1.6%-3.8%)    | 1.9%<br>(1.0%-3.1%)    | 2.8%<br>(1.7%-4.2%)    | 8.4%<br>(-2.6%-22.5%)     | 8.3%<br>(-1.8%-16.7%)     |
| <b>Oceania</b>                      | 0.4%<br>(0.0%-1.1%)    | 0.7%<br>(0.2%-1.5%)    | 0.4%<br>(0.0%-1.0%)    | 0.7%<br>(0.2%-1.4%)    | -5.3%<br>(-28.1%-93.3%)   | -4.6%<br>(-17.6%-22.6%)   |
| <b>Southeast Asia</b>               | 0.9%<br>(0.3%-1.7%)    | 1.6%<br>(0.8%-2.5%)    | 0.9%<br>(0.3%-1.8%)    | 1.7%<br>(0.8%-2.6%)    | 5.0%<br>(-3.5%-26.1%)     | 3.6%<br>(-3.9%-13.0%)     |
| <b>Central Sub-Saharan Africa</b>   | 1.1%<br>(0.4%-2.0%)    | 1.8%<br>(0.9%-2.7%)    | 1.4%<br>(0.7%-2.4%)    | 2.1%<br>(1.2%-3.2%)    | 28.9%<br>(12.8%-76.8%)    | 21.4%<br>(8.3%-45.3%)     |
| <b>Eastern Sub-Saharan Africa</b>   | 1.4%<br>(0.6%-2.3%)    | 3.2%<br>(2.1%-4.5%)    | 1.5%<br>(0.7%-2.5%)    | 2.9%<br>(1.8%-4.3%)    | 4.9%<br>(-1.9%-15.4%)     | -7.0%<br>(-15.0%-0.6%)    |
| <b>Southern Sub-Saharan Africa</b>  | 0.6%<br>(0.0%-1.4%)    | 1.5%<br>(0.7%-2.4%)    | 0.8%<br>(0.2%-1.6%)    | 1.5%<br>(0.7%-2.5%)    | 33.8%<br>(13.1%-296.9%)   | -0.7%<br>(-11.9%-12.2%)   |
| <b>Western Sub-Saharan Africa</b>   | 1.2%<br>(0.5%-2.1%)    | 1.6%<br>(0.8%-2.5%)    | 1.4%<br>(0.6%-2.3%)    | 1.9%<br>(1.1%-3.0%)    | 14.8%<br>(1.4%-49.5%)     | 21.6%<br>(8.0%-50.0%)     |
| <b>Tobacco</b>                      |                        |                        |                        |                        |                           |                           |
| <b>Global</b>                       | 17.6%<br>(14.9%-20.3%) | 43.6%<br>(38.0%-48.1%) | 13.3%<br>(10.8%-15.7%) | 33.6%<br>(28.3%-37.8%) | -24.7%<br>(-32.8%--16.8%) | -23.0%<br>(-27.5%--18.5%) |
| <b>High SDI</b>                     | 27.8%<br>(23.6%-32.1%) | 44.4%<br>(38.6%-49.2%) | 21.0%<br>(17.3%-24.6%) | 31.5%<br>(26.1%-36.2%) | -24.6%<br>(-31.4%--18.3%) | -29.1%<br>(-34.7%--22.9%) |
| <b>High-middle SDI</b>              | 10.1%<br>(8.0%-12.2%)  | 49.1%<br>(42.7%-53.8%) | 10.6%<br>(8.3%-12.8%)  | 42.4%<br>(36.3%-47.2%) | 4.7%<br>(-10.1%-18.4%)    | -13.7%<br>(-17.4%--10.2%) |
| <b>Middle SDI</b>                   | 13.9%<br>(10.6%-17.2%) | 42.4%<br>(36.4%-47.3%) | 9.1%<br>(6.9%-11.3%)   | 33.8%<br>(27.3%-39.3%) | -34.9%<br>(-44.6%--25.2%) | -20.2%<br>(-27.5%--14.1%) |
| <b>Low-middle SDI</b>               | 11.1%<br>(8.1%-14.7%)  | 39.3%<br>(33.3%-44.3%) | 8.0%<br>(6.1%-10.0%)   | 32.7%<br>(26.5%-37.8%) | -28.3%<br>(-40.4%--14.6%) | -16.8%<br>(-23.8%--11.5%) |
| <b>Low SDI</b>                      | 5.5%<br>(3.9%-7.4%)    | 25.7%<br>(19.5%-31.3%) | 5.3%<br>(3.6%-7.9%)    | 20.1%<br>(15.0%-25.0%) | -4.2%<br>(-20.5%-20.1%)   | -21.8%<br>(-28.4%--14.2%) |

|                                     |                        |                        |                        |                        |                           |                           |
|-------------------------------------|------------------------|------------------------|------------------------|------------------------|---------------------------|---------------------------|
| <b>Central Asia</b>                 | 4.6%<br>(3.0%-6.5%)    | 51.8%<br>(44.2%-57.9%) | 3.7%<br>(2.6%-4.9%)    | 45.7%<br>(38.8%-50.6%) | -19.5%<br>(-37.4%-2.8%)   | -11.8%<br>(-17.9%--5.7%)  |
| <b>Central Europe</b>               | 22.2%<br>(17.8%-26.7%) | 51.2%<br>(44.0%-56.2%) | 18.9%<br>(15.1%-22.4%) | 42.2%<br>(35.1%-47.6%) | -15.1%<br>(-28.2%--2.3%)  | -17.6%<br>(-22.8%--12.8%) |
| <b>Eastern Europe</b>               | 5.7%<br>(3.8%-7.7%)    | 52.6%<br>(44.9%-58.3%) | 8.3%<br>(5.8%-10.5%)   | 54.4%<br>(46.7%-59.7%) | 46.1%<br>(14.2%-85.7%)    | 3.4%<br>(-0.7%-8.3%)      |
| <b>Australasia</b>                  | 23.6%<br>(19.7%-27.7%) | 34.6%<br>(29.4%-39.4%) | 13.4%<br>(10.7%-16.3%) | 18.0%<br>(14.4%-21.7%) | -43.0%<br>(-51.8%--32.6%) | -48.0%<br>(-54.4%--40.7%) |
| <b>High-income Asia Pacific</b>     | 14.8%<br>(11.7%-18.3%) | 56.8%<br>(51.2%-61.7%) | 9.3%<br>(6.6%-12.1%)   | 40.5%<br>(34.8%-45.7%) | -37.2%<br>(-50.4%--23.9%) | -28.6%<br>(-33.9%--23.0%) |
| <b>High-income North America</b>    | 34.5%<br>(28.6%-39.6%) | 45.0%<br>(38.2%-50.7%) | 23.9%<br>(19.2%-28.2%) | 30.4%<br>(24.4%-35.6%) | -30.8%<br>(-37.5%--24.1%) | -32.5%<br>(-39.3%--25.4%) |
| <b>Southern Latin America</b>       | 20.4%<br>(16.0%-24.6%) | 31.4%<br>(25.6%-36.5%) | 16.9%<br>(13.4%-20.5%) | 23.1%<br>(18.0%-28.1%) | -17.1%<br>(-29.9%--1.4%)  | -26.4%<br>(-34.2%--16.8%) |
| <b>Western Europe</b>               | 22.0%<br>(18.4%-25.3%) | 45.8%<br>(40.1%-50.5%) | 16.8%<br>(13.8%-20.0%) | 32.7%<br>(27.7%-37.2%) | -23.6%<br>(-33.3%--13.9%) | -28.7%<br>(-33.6%--23.3%) |
| <b>Andean Latin America</b>         | 3.0%<br>(1.9%-4.6%)    | 20.9%<br>(16.3%-25.8%) | 2.3%<br>(1.5%-3.2%)    | 13.0%<br>(9.7%-16.4%)  | -25.2%<br>(-46.4%-3.5%)   | -37.9%<br>(-48.7%--25.0%) |
| <b>Caribbean</b>                    | 15.7%<br>(11.9%-19.7%) | 39.1%<br>(33.1%-44.4%) | 14.5%<br>(10.8%-18.5%) | 33.9%<br>(27.6%-39.3%) | -8.0%<br>(-26.9%-14.4%)   | -13.3%<br>(-20.6%--4.6%)  |
| <b>Central Latin America</b>        | 15.2%<br>(11.6%-19.1%) | 36.5%<br>(31.2%-41.4%) | 7.7%<br>(5.7%-9.9%)    | 21.2%<br>(17.0%-25.2%) | -49.6%<br>(-60.0%--38.5%) | -41.9%<br>(-48.5%--35.3%) |
| <b>Tropical Latin America</b>       | 29.4%<br>(23.4%-35.4%) | 49.9%<br>(42.8%-55.3%) | 17.1%<br>(13.1%-20.9%) | 30.5%<br>(24.3%-35.6%) | -41.9%<br>(-51.2%--31.5%) | -38.8%<br>(-45.6%--31.8%) |
| <b>North Africa and Middle East</b> | 11.6%<br>(7.4%-16.5%)  | 51.9%<br>(44.7%-58.8%) | 7.6%<br>(5.5%-9.9%)    | 40.8%<br>(34.2%-46.0%) | -34.8%<br>(-51.8%--10.6%) | -21.4%<br>(-29.2%--13.1%) |
| <b>South Asia</b>                   | 7.1%<br>(5.2%-9.2%)    | 40.4%<br>(33.8%-45.9%) | 6.8%<br>(4.9%-8.7%)    | 32.1%<br>(26.2%-37.0%) | -4.5%<br>(-24.8%-18.8%)   | -20.6%<br>(-26.3%--14.8%) |

|                                    |                        |                        |                       |                        |                           |                           |
|------------------------------------|------------------------|------------------------|-----------------------|------------------------|---------------------------|---------------------------|
| <b>East Asia</b>                   | 8.7%<br>(6.0%-11.8%)   | 49.3%<br>(43.3%-55.6%) | 9.8%<br>(7.6%-11.9%)  | 49.6%<br>(44.4%-53.7%) | 12.9%<br>(-13.4%-49.0%)   | 0.5%<br>(-8.6%-8.8%)      |
| <b>Oceania</b>                     | 13.4%<br>(9.4%-18.0%)  | 33.6%<br>(26.1%-41.4%) | 11.4%<br>(8.1%-15.0%) | 26.4%<br>(19.4%-33.5%) | -15.5%<br>(-36.0%-15.8%)  | -21.6%<br>(-34.4%--7.1%)  |
| <b>Southeast Asia</b>              | 7.9%<br>(5.9%-10.2%)   | 50.8%<br>(42.9%-56.4%) | 6.5%<br>(4.8%-8.3%)   | 46.1%<br>(38.7%-51.9%) | -17.7%<br>(-31.2%--1.3%)  | -9.1%<br>(-14.0%--4.3%)   |
| <b>Central Sub-Saharan Africa</b>  | 2.3%<br>(1.4%-3.4%)    | 22.4%<br>(16.1%-28.5%) | 1.8%<br>(1.1%-2.6%)   | 18.0%<br>(12.8%-23.1%) | -22.3%<br>(-45.0%-7.8%)   | -19.8%<br>(-32.1%--5.0%)  |
| <b>Eastern Sub-Saharan Africa</b>  | 5.3%<br>(3.7%-7.0%)    | 25.8%<br>(20.2%-30.8%) | 4.7%<br>(3.2%-6.2%)   | 19.6%<br>(14.6%-24.5%) | -11.2%<br>(-25.1%-4.1%)   | -24.0%<br>(-31.1%--16.0%) |
| <b>Southern Sub-Saharan Africa</b> | 22.3%<br>(16.7%-28.0%) | 52.4%<br>(44.3%-58.3%) | 11.2%<br>(7.9%-14.7%) | 32.3%<br>(24.5%-38.9%) | -49.6%<br>(-60.4%--35.7%) | -38.4%<br>(-46.9%--31.0%) |
| <b>Western Sub-Saharan Africa</b>  | 4.9%<br>(2.8%-7.3%)    | 16.8%<br>(11.7%-21.1%) | 3.6%<br>(2.1%-5.5%)   | 14.1%<br>(9.9%-17.7%)  | -26.7%<br>(-48.6%-2.0%)   | -16.0%<br>(-24.8%--5.5%)  |

**Data in parentheses are 95% uncertainty intervals.**

**SDI, socio-demographic index; PAF, population attributable fraction.**
